# Supplementary material for: Circular RNA circATP9A promotes non-small cell lung cancer progression by interacting with HuR and by promoting extracellular vesicles-mediated macrophage M2 polarization
Source: J Exp Clin Cancer Res. 2023 Dec 5;42:330. doi: 10.1186/s13046-023-02916-6 (PMC10696866; doi:10.1186/s13046-023-02916-6)
Supplement: Supplementary file 3 — Additional file 3. [file 13046_2023_2916_MOESM3_ESM.xlsx]

## Sheet: Sheet1
RBP	geneID	geneName	geneType	clusterNum	clipExpNum	clipIDnum	HepG2(shRNA)	K562(shRNA)	HepG2(CRIPSR)	K562(CRIPSR)	pancancerNum
ELAVL1	ENSG00000168702	LRP1B	protein_coding	1297	26	6333	NA	NA	NA	NA	15
ELAVL1	ENSG00000141376	BCAS3	protein_coding	646	27	2960	NA	NA	NA	NA	21
ELAVL1	ENSG00000186153	WWOX	protein_coding	648	28	2713	NA	NA	NA	NA	20
ELAVL1	ENSG00000123066	MED13L	protein_coding	437	32	2458	NA	NA	NA	NA	23
ELAVL1	ENSG00000156110	ADK	protein_coding	498	32	2139	NA	NA	NA	NA	16
ELAVL1	ENSG00000091831	ESR1	protein_coding	511	21	2092	NA	NA	NA	NA	15
ELAVL1	ENSG00000104447	TRPS1	protein_coding	384	29	2040	NA	NA	NA	NA	14
ELAVL1	ENSG00000138814	PPP3CA	protein_coding	469	28	2032	NA	NA	NA	NA	17
ELAVL1	ENSG00000144724	PTPRG	protein_coding	501	27	2025	NA	NA	NA	NA	17
ELAVL1	ENSG00000162599	NFIA	protein_coding	348	33	1987	NA	NA	NA	NA	9
ELAVL1	ENSG00000184349	EFNA5	protein_coding	349	30	1986	NA	NA	NA	NA	15
ELAVL1	ENSG00000136492	BRIP1	protein_coding	256	31	1983	NA	NA	NA	NA	29
ELAVL1	ENSG00000140443	IGF1R	protein_coding	357	29	1964	NA	NA	NA	NA	15
ELAVL1	ENSG00000183098	GPC6	protein_coding	494	27	1846	NA	NA	NA	NA	15
ELAVL1	ENSG00000124151	NCOA3	protein_coding	256	29	1805	NA	NA	NA	NA	16
ELAVL1	ENSG00000109452	INPP4B	protein_coding	534	23	1687	NA	NA	NA	NA	16
ELAVL1	ENSG00000182185	RAD51B	protein_coding	427	31	1638	NA	NA	NA	NA	15
ELAVL1	ENSG00000156639	ZFAND3	protein_coding	354	30	1602	NA	NA	NA	NA	24
ELAVL1	ENSG00000185630	PBX1	protein_coding	343	28	1497	NA	NA	NA	NA	21
ELAVL1	ENSG00000108510	MED13	protein_coding	174	33	1467	NA	NA	NA	0.129	22
ELAVL1	ENSG00000151276	MAGI1	protein_coding	379	27	1464	NA	NA	NA	NA	17
ELAVL1	ENSG00000171723	GPHN	protein_coding	373	27	1464	NA	NA	NA	NA	20
ELAVL1	ENSG00000163697	APBB2	protein_coding	369	26	1430	NA	NA	NA	NA	13
ELAVL1	ENSG00000178568	ERBB4	protein_coding	410	27	1423	NA	NA	NA	NA	16
ELAVL1	ENSG00000155974	GRIP1	protein_coding	356	26	1400	NA	NA	NA	NA	17
ELAVL1	ENSG00000108395	TRIM37	protein_coding	186	27	1394	NA	NA	NA	NA	29
ELAVL1	ENSG00000148498	PARD3	protein_coding	455	32	1390	NA	NA	NA	NA	21
ELAVL1	ENSG00000104517	UBR5	protein_coding	206	27	1375	NA	NA	NA	NA	22
ELAVL1	ENSG00000154654	NCAM2	protein_coding	378	21	1366	NA	NA	NA	-0.557	11
ELAVL1	ENSG00000118007	STAG1	protein_coding	336	27	1364	NA	NA	NA	-0.577	26
ELAVL1	ENSG00000132549	VPS13B	protein_coding	405	26	1352	NA	NA	NA	-0.357	23
ELAVL1	ENSG00000132466	ANKRD17	protein_coding	243	32	1323	NA	NA	NA	NA	24
ELAVL1	ENSG00000171988	JMJD1C	protein_coding	365	30	1312	NA	NA	NA	NA	20
ELAVL1	ENSG00000177565	TBL1XR1	protein_coding	222	31	1300	NA	NA	NA	NA	26
ELAVL1	ENSG00000038382	TRIO	protein_coding	293	30	1283	NA	NA	NA	NA	22
ELAVL1	ENSG00000169855	ROBO1	protein_coding	439	31	1277	NA	NA	0.157	NA	16
ELAVL1	ENSG00000115760	BIRC6	protein_coding	292	34	1261	NA	NA	NA	NA	24
ELAVL1	ENSG00000169398	PTK2	protein_coding	312	31	1237	NA	NA	NA	NA	24
ELAVL1	ENSG00000197323	TRIM33	protein_coding	186	31	1237	NA	NA	NA	NA	26
ELAVL1	ENSG00000055609	KMT2C	protein_coding	337	28	1234	NA	NA	NA	NA	22
ELAVL1	ENSG00000170832	USP32	protein_coding	270	27	1215	NA	NA	NA	NA	17
ELAVL1	ENSG00000114861	FOXP1	protein_coding	325	29	1188	NA	NA	NA	-0.322	11
ELAVL1	ENSG00000153944	MSI2	protein_coding	301	33	1186	NA	NA	NA	NA	25
ELAVL1	ENSG00000185658	BRWD1	protein_coding	181	27	1172	NA	NA	NA	0.228	19
ELAVL1	ENSG00000124126	PREX1	protein_coding	274	19	1169	NA	NA	NA	NA	11
ELAVL1	ENSG00000121741	ZMYM2	protein_coding	175	31	1155	NA	NA	NA	NA	21
ELAVL1	ENSG00000145147	SLIT2	protein_coding	349	27	1150	NA	NA	NA	NA	19
ELAVL1	ENSG00000119969	HELLS	protein_coding	135	35	1145	NA	NA	NA	NA	29
ELAVL1	ENSG00000104375	STK3	protein_coding	302	24	1137	NA	NA	NA	NA	20
ELAVL1	ENSG00000285708	AC097634.4	protein_coding	341	28	1117	NA	NA	NA	NA	0
ELAVL1	ENSG00000115464	USP34	protein_coding	285	29	1098	NA	NA	NA	NA	24
ELAVL1	ENSG00000147905	ZCCHC7	protein_coding	222	28	1093	NA	NA	NA	NA	25
ELAVL1	ENSG00000081026	MAGI3	protein_coding	216	26	1086	NA	NA	NA	NA	19
ELAVL1	ENSG00000135250	SRPK2	protein_coding	274	32	1085	NA	NA	NA	NA	22
ELAVL1	ENSG00000062716	VMP1	protein_coding	172	29	1078	NA	NA	0.243	NA	13
ELAVL1	ENSG00000110075	PPP6R3	protein_coding	207	29	1076	NA	NA	NA	NA	22
ELAVL1	ENSG00000156052	GNAQ	protein_coding	250	27	1062	NA	NA	NA	-0.436	19
ELAVL1	ENSG00000198589	LRBA	protein_coding	389	30	1061	NA	NA	NA	NA	22
ELAVL1	ENSG00000075151	EIF4G3	protein_coding	286	31	1052	NA	NA	NA	NA	23
ELAVL1	ENSG00000273217	AC008695.1	protein_coding	327	31	1051	NA	NA	NA	NA	1
ELAVL1	ENSG00000124177	CHD6	protein_coding	193	25	1028	NA	NA	NA	NA	24
ELAVL1	ENSG00000138696	BMPR1B	protein_coding	311	26	1024	NA	NA	NA	NA	18
ELAVL1	ENSG00000156831	NSMCE2	protein_coding	256	28	1023	NA	NA	NA	NA	20
ELAVL1	ENSG00000033170	FUT8	protein_coding	265	26	1022	NA	NA	NA	NA	22
ELAVL1	ENSG00000085276	MECOM	protein_coding	326	29	1019	NA	NA	NA	NA	17
ELAVL1	ENSG00000055917	PUM2	protein_coding	148	31	1016	NA	NA	NA	NA	27
ELAVL1	ENSG00000107929	LARP4B	protein_coding	158	32	1013	NA	NA	NA	NA	27
ELAVL1	ENSG00000257923	CUX1	protein_coding	243	32	1010	NA	NA	NA	NA	19
ELAVL1	ENSG00000198265	HELZ	protein_coding	219	31	1008	NA	NA	-0.173	NA	23
ELAVL1	ENSG00000131149	GSE1	protein_coding	306	25	999	NA	NA	NA	-0.172	25
ELAVL1	ENSG00000166233	ARIH1	protein_coding	178	32	993	NA	NA	NA	0.137	24
ELAVL1	ENSG00000173575	CHD2	protein_coding	169	29	986	NA	NA	NA	0.346	27
ELAVL1	ENSG00000167522	ANKRD11	protein_coding	233	31	985	NA	NA	NA	NA	21
ELAVL1	ENSG00000092439	TRPM7	protein_coding	172	29	969	NA	NA	NA	NA	21
ELAVL1	ENSG00000152601	MBNL1	protein_coding	196	32	969	NA	NA	NA	-0.31	15
ELAVL1	ENSG00000189079	ARID2	protein_coding	194	28	962	NA	NA	NA	NA	25
ELAVL1	ENSG00000131374	TBC1D5	protein_coding	316	26	958	NA	NA	NA	-0.211	18
ELAVL1	ENSG00000152520	PAN3	protein_coding	201	29	958	NA	NA	NA	NA	21
ELAVL1	ENSG00000175175	PPM1E	protein_coding	213	25	954	NA	NA	NA	NA	22
ELAVL1	ENSG00000197555	SIPA1L1	protein_coding	251	26	953	NA	NA	NA	NA	18
ELAVL1	ENSG00000174891	RSRC1	protein_coding	270	32	950	NA	NA	NA	-0.434	28
ELAVL1	ENSG00000075711	DLG1	protein_coding	244	32	949	NA	NA	NA	NA	22
ELAVL1	ENSG00000143207	COP1	protein_coding	249	30	945	NA	NA	NA	NA	26
ELAVL1	ENSG00000095787	WAC	protein_coding	126	28	940	NA	NA	NA	NA	21
ELAVL1	ENSG00000140836	ZFHX3	protein_coding	231	31	936	NA	NA	NA	NA	20
ELAVL1	ENSG00000134769	DTNA	protein_coding	339	23	930	NA	NA	NA	NA	12
ELAVL1	ENSG00000142599	RERE	protein_coding	355	32	927	NA	NA	-0.184	NA	20
ELAVL1	ENSG00000101868	POLA1	protein_coding	326	26	925	NA	NA	NA	NA	29
ELAVL1	ENSG00000133424	LARGE1	protein_coding	256	28	925	NA	NA	NA	NA	16
ELAVL1	ENSG00000111596	CNOT2	protein_coding	154	30	924	NA	NA	NA	NA	21
ELAVL1	ENSG00000157540	DYRK1A	protein_coding	210	33	924	NA	NA	NA	NA	26
ELAVL1	ENSG00000075292	ZNF638	protein_coding	159	27	923	NA	NA	NA	NA	24
ELAVL1	ENSG00000151892	GFRA1	protein_coding	217	18	921	NA	NA	NA	NA	11
ELAVL1	ENSG00000078403	MLLT10	protein_coding	233	30	920	NA	NA	NA	-0.138	24
ELAVL1	ENSG00000133119	RFC3	protein_coding	191	28	915	NA	NA	NA	NA	30
ELAVL1	ENSG00000164190	NIPBL	protein_coding	229	28	915	NA	NA	NA	NA	26
ELAVL1	ENSG00000009335	UBE3C	protein_coding	170	28	909	NA	NA	NA	NA	26
ELAVL1	ENSG00000163635	ATXN7	protein_coding	175	27	908	NA	NA	NA	NA	19
ELAVL1	ENSG00000188312	CENPP	protein_coding	239	25	907	NA	NA	NA	-0.766	27
ELAVL1	ENSG00000082701	GSK3B	protein_coding	235	31	905	NA	NA	NA	NA	26
ELAVL1	ENSG00000111371	SLC38A1	protein_coding	114	30	899	NA	NA	NA	-0.16	17
ELAVL1	ENSG00000049618	ARID1B	protein_coding	269	29	897	NA	NA	NA	-0.261	24
ELAVL1	ENSG00000185104	FAF1	protein_coding	363	27	894	NA	NA	NA	NA	25
ELAVL1	ENSG00000196792	STRN3	protein_coding	161	32	893	NA	NA	0.144	0.451	21
ELAVL1	ENSG00000117523	PRRC2C	protein_coding	145	29	892	NA	NA	NA	-0.251	24
ELAVL1	ENSG00000139154	AEBP2	protein_coding	282	30	892	NA	NA	NA	NA	29
ELAVL1	ENSG00000020426	MNAT1	protein_coding	240	26	890	NA	NA	NA	NA	23
ELAVL1	ENSG00000177425	PAWR	protein_coding	158	31	889	NA	NA	NA	NA	20
ELAVL1	ENSG00000182621	PLCB1	protein_coding	290	27	885	NA	NA	NA	NA	17
ELAVL1	ENSG00000147050	KDM6A	protein_coding	272	30	884	NA	NA	NA	NA	23
ELAVL1	ENSG00000139734	DIAPH3	protein_coding	412	29	881	NA	NA	NA	NA	30
ELAVL1	ENSG00000204842	ATXN2	protein_coding	181	33	875	NA	NA	NA	NA	29
ELAVL1	ENSG00000092199	HNRNPC	protein_coding	81	30	874	NA	NA	NA	NA	31
ELAVL1	ENSG00000083307	GRHL2	protein_coding	184	22	865	NA	NA	NA	NA	16
ELAVL1	ENSG00000108443	RPS6KB1	protein_coding	83	29	855	NA	NA	NA	NA	25
ELAVL1	ENSG00000128585	MKLN1	protein_coding	221	32	855	NA	NA	NA	0.198	16
ELAVL1	ENSG00000158321	AUTS2	protein_coding	480	21	855	NA	NA	NA	NA	20
ELAVL1	ENSG00000066651	TRMT11	protein_coding	274	22	854	NA	NA	NA	0.306	25
ELAVL1	ENSG00000082805	ERC1	protein_coding	287	33	849	NA	NA	NA	NA	18
ELAVL1	ENSG00000148634	HERC4	protein_coding	172	29	846	NA	NA	NA	NA	20
ELAVL1	ENSG00000083642	PDS5B	protein_coding	219	31	845	NA	NA	NA	NA	24
ELAVL1	ENSG00000170921	TANC2	protein_coding	254	27	841	NA	NA	NA	NA	16
ELAVL1	ENSG00000162670	BRINP3	protein_coding	249	18	840	NA	NA	NA	NA	11
ELAVL1	ENSG00000196233	LCOR	protein_coding	177	28	837	NA	NA	NA	NA	24
ELAVL1	ENSG00000116539	ASH1L	protein_coding	196	28	835	NA	NA	NA	NA	23
ELAVL1	ENSG00000145808	ADAMTS19	protein_coding	214	21	834	NA	NA	NA	NA	16
ELAVL1	ENSG00000075223	SEMA3C	protein_coding	217	23	833	NA	NA	NA	NA	13
ELAVL1	ENSG00000054267	ARID4B	protein_coding	227	28	826	NA	NA	-0.342	NA	23
ELAVL1	ENSG00000102804	TSC22D1	protein_coding	159	27	826	NA	NA	NA	NA	15
ELAVL1	ENSG00000113448	PDE4D	protein_coding	458	26	823	NA	NA	NA	NA	13
ELAVL1	ENSG00000244754	N4BP2L2	protein_coding	147	30	823	NA	NA	NA	NA	15
ELAVL1	ENSG00000196712	NF1	protein_coding	228	33	822	NA	NA	NA	NA	23
ELAVL1	ENSG00000139163	ETNK1	protein_coding	79	31	820	NA	NA	-0.24	NA	27
ELAVL1	ENSG00000167081	PBX3	protein_coding	184	31	818	NA	NA	NA	NA	14
ELAVL1	ENSG00000168137	SETD5	protein_coding	115	34	818	NA	NA	NA	0.177	24
ELAVL1	ENSG00000123124	WWP1	protein_coding	175	24	812	NA	NA	NA	NA	14
ELAVL1	ENSG00000179912	R3HDM2	protein_coding	157	31	804	NA	NA	NA	NA	21
ELAVL1	ENSG00000206560	ANKRD28	protein_coding	207	30	803	NA	NA	NA	NA	21
ELAVL1	ENSG00000060237	WNK1	protein_coding	175	31	799	NA	NA	NA	NA	21
ELAVL1	ENSG00000047346	FAM214A	protein_coding	145	25	796	NA	NA	NA	NA	18
ELAVL1	ENSG00000130449	ZSWIM6	protein_coding	203	32	789	NA	NA	NA	NA	19
ELAVL1	ENSG00000146872	TLK2	protein_coding	170	25	787	NA	NA	NA	NA	28
ELAVL1	ENSG00000138430	OLA1	protein_coding	216	27	785	NA	NA	NA	NA	25
ELAVL1	ENSG00000182197	EXT1	protein_coding	248	29	782	NA	NA	NA	NA	17
ELAVL1	ENSG00000121390	PSPC1	protein_coding	131	27	779	NA	NA	0.493	NA	30
ELAVL1	ENSG00000078140	UBE2K	protein_coding	109	31	769	NA	NA	NA	NA	26
ELAVL1	ENSG00000092978	GPATCH2	protein_coding	213	26	769	NA	NA	NA	NA	27
ELAVL1	ENSG00000112249	ASCC3	protein_coding	304	26	769	NA	NA	NA	NA	27
ELAVL1	ENSG00000124788	ATXN1	protein_coding	274	31	769	NA	NA	NA	NA	16
ELAVL1	ENSG00000139746	RBM26	protein_coding	128	28	769	NA	NA	NA	NA	23
ELAVL1	ENSG00000187720	THSD4	protein_coding	229	26	764	NA	NA	NA	NA	11
ELAVL1	ENSG00000005339	CREBBP	protein_coding	163	29	759	NA	NA	NA	NA	23
ELAVL1	ENSG00000172765	TMCC1	protein_coding	196	24	751	NA	NA	-0.596	NA	18
ELAVL1	ENSG00000056097	ZFR	protein_coding	108	32	747	NA	NA	NA	NA	29
ELAVL1	ENSG00000134644	PUM1	protein_coding	179	30	745	NA	NA	-0.224	NA	26
ELAVL1	ENSG00000145495	MARCHF6	protein_coding	100	34	744	NA	NA	NA	0.162	21
ELAVL1	ENSG00000204764	RANBP17	protein_coding	232	26	743	NA	NA	NA	NA	12
ELAVL1	ENSG00000112531	QKI	protein_coding	168	30	742	NA	NA	-0.127	NA	19
ELAVL1	ENSG00000185305	ARL15	protein_coding	224	28	742	NA	NA	NA	NA	11
ELAVL1	ENSG00000062725	APPBP2	protein_coding	113	27	740	NA	NA	NA	-0.53	23
ELAVL1	ENSG00000109670	FBXW7	protein_coding	211	28	740	NA	NA	NA	NA	13
ELAVL1	ENSG00000146247	PHIP	protein_coding	159	31	740	NA	NA	NA	0.422	24
ELAVL1	ENSG00000073921	PICALM	protein_coding	156	29	739	NA	NA	NA	NA	15
ELAVL1	ENSG00000140396	NCOA2	protein_coding	219	26	739	NA	NA	NA	NA	20
ELAVL1	ENSG00000187109	NAP1L1	protein_coding	65	32	731	NA	NA	NA	NA	24
ELAVL1	ENSG00000163590	PPM1L	protein_coding	159	24	730	NA	NA	NA	NA	16
ELAVL1	ENSG00000121892	PDS5A	protein_coding	174	28	728	NA	NA	NA	NA	27
ELAVL1	ENSG00000143919	CAMKMT	protein_coding	268	28	728	NA	NA	NA	NA	21
ELAVL1	ENSG00000009307	CSDE1	protein_coding	57	32	724	NA	NA	0.084	NA	20
ELAVL1	ENSG00000082898	XPO1	protein_coding	73	31	724	NA	NA	NA	NA	29
ELAVL1	ENSG00000160551	TAOK1	protein_coding	142	33	722	NA	NA	NA	NA	24
ELAVL1	ENSG00000080802	CNOT4	protein_coding	181	29	720	NA	NA	NA	NA	22
ELAVL1	ENSG00000102908	NFAT5	protein_coding	144	32	720	NA	NA	NA	NA	20
ELAVL1	ENSG00000156802	ATAD2	protein_coding	111	30	720	NA	NA	NA	NA	29
ELAVL1	ENSG00000140262	TCF12	protein_coding	253	30	715	NA	NA	NA	-0.177	26
ELAVL1	ENSG00000171862	PTEN	protein_coding	124	31	715	NA	NA	NA	NA	15
ELAVL1	ENSG00000138095	LRPPRC	protein_coding	140	30	713	NA	NA	NA	-0.253	26
ELAVL1	ENSG00000036549	ZZZ3	protein_coding	164	29	712	NA	NA	NA	NA	23
ELAVL1	ENSG00000162434	JAK1	protein_coding	183	25	712	NA	NA	NA	NA	15
ELAVL1	ENSG00000181090	EHMT1	protein_coding	147	25	712	NA	NA	NA	NA	29
ELAVL1	ENSG00000144283	PKP4	protein_coding	198	26	711	NA	NA	NA	-0.279	26
ELAVL1	ENSG00000154229	PRKCA	protein_coding	241	28	711	NA	NA	NA	NA	12
ELAVL1	ENSG00000069275	NUCKS1	protein_coding	51	32	710	NA	NA	NA	NA	28
ELAVL1	ENSG00000280987	MATR3	protein_coding	72	34	710	NA	NA	NA	0.344	26
ELAVL1	ENSG00000131558	EXOC4	protein_coding	268	30	707	NA	NA	NA	NA	17
ELAVL1	ENSG00000135870	RC3H1	protein_coding	107	31	707	NA	NA	NA	NA	22
ELAVL1	ENSG00000112851	ERBIN	protein_coding	157	32	706	NA	NA	NA	NA	21
ELAVL1	ENSG00000083312	TNPO1	protein_coding	108	34	704	NA	NA	NA	NA	23
ELAVL1	ENSG00000117569	PTBP2	protein_coding	143	31	704	NA	NA	NA	NA	17
ELAVL1	ENSG00000090060	PAPOLA	protein_coding	77	30	701	NA	NA	NA	NA	29
ELAVL1	ENSG00000151532	VTI1A	protein_coding	280	29	700	NA	NA	NA	NA	18
ELAVL1	ENSG00000043514	TRIT1	protein_coding	57	28	698	NA	NA	NA	NA	27
ELAVL1	ENSG00000213079	SCAF8	protein_coding	142	28	698	NA	NA	NA	NA	24
ELAVL1	ENSG00000171681	ATF7IP	protein_coding	158	31	697	NA	NA	NA	0.23	24
ELAVL1	ENSG00000170836	PPM1D	protein_coding	87	23	696	NA	NA	-0.181	NA	28
ELAVL1	ENSG00000090905	TNRC6A	protein_coding	142	28	693	NA	NA	NA	NA	22
ELAVL1	ENSG00000085224	ATRX	protein_coding	223	32	691	NA	NA	NA	NA	21
ELAVL1	ENSG00000109381	ELF2	protein_coding	155	29	689	NA	NA	NA	NA	21
ELAVL1	ENSG00000082068	WDR70	protein_coding	238	23	684	NA	NA	NA	NA	23
ELAVL1	ENSG00000115419	GLS	protein_coding	103	32	683	NA	NA	NA	0.251	19
ELAVL1	ENSG00000142192	APP	protein_coding	260	27	681	NA	NA	NA	NA	17
ELAVL1	ENSG00000078114	NEBL	protein_coding	202	20	679	NA	NA	NA	NA	12
ELAVL1	ENSG00000118689	FOXO3	protein_coding	154	28	675	NA	NA	NA	NA	16
ELAVL1	ENSG00000122482	ZNF644	protein_coding	137	26	675	NA	NA	NA	NA	26
ELAVL1	ENSG00000188994	ZNF292	protein_coding	150	27	673	NA	NA	NA	NA	22
ELAVL1	ENSG00000166575	TMEM135	protein_coding	207	26	672	NA	NA	NA	0.271	17
ELAVL1	ENSG00000058272	PPP1R12A	protein_coding	183	30	669	NA	NA	NA	NA	22
ELAVL1	ENSG00000143776	CDC42BPA	protein_coding	267	30	667	NA	NA	NA	-0.147	16
ELAVL1	ENSG00000146963	LUC7L2	protein_coding	91	34	667	NA	NA	NA	NA	26
ELAVL1	ENSG00000163848	ZNF148	protein_coding	166	30	666	NA	NA	NA	NA	24
ELAVL1	ENSG00000146263	MMS22L	protein_coding	169	30	664	NA	NA	NA	NA	27
ELAVL1	ENSG00000100749	VRK1	protein_coding	180	29	663	NA	NA	NA	NA	31
ELAVL1	ENSG00000185532	PRKG1	protein_coding	388	19	662	NA	NA	NA	NA	15
ELAVL1	ENSG00000100731	PCNX1	protein_coding	173	28	661	NA	NA	NA	NA	18
ELAVL1	ENSG00000171634	BPTF	protein_coding	160	29	661	NA	NA	NA	NA	27
ELAVL1	ENSG00000163625	WDFY3	protein_coding	195	25	659	NA	NA	NA	NA	20
ELAVL1	ENSG00000100154	TTC28	protein_coding	337	24	658	NA	NA	NA	NA	19
ELAVL1	ENSG00000143190	POU2F1	protein_coding	166	28	658	NA	NA	NA	NA	27
ELAVL1	ENSG00000105983	LMBR1	protein_coding	179	30	656	NA	NA	NA	NA	27
ELAVL1	ENSG00000154380	ENAH	protein_coding	188	32	656	NA	NA	0.175	NA	19
ELAVL1	ENSG00000111880	RNGTT	protein_coding	253	28	654	NA	NA	NA	NA	27
ELAVL1	ENSG00000174106	LEMD3	protein_coding	107	25	654	NA	NA	NA	NA	23
ELAVL1	ENSG00000162961	DPY30	protein_coding	197	27	653	NA	NA	NA	0.315	21
ELAVL1	ENSG00000011454	RABGAP1	protein_coding	164	25	652	NA	NA	NA	NA	25
ELAVL1	ENSG00000009413	REV3L	protein_coding	181	26	650	NA	NA	NA	NA	20
ELAVL1	ENSG00000069020	MAST4	protein_coding	222	22	647	NA	NA	NA	NA	14
ELAVL1	ENSG00000061987	MON2	protein_coding	153	24	646	NA	NA	NA	0.382	20
ELAVL1	ENSG00000154001	PPP2R5E	protein_coding	195	29	644	NA	NA	NA	NA	22
ELAVL1	ENSG00000096063	SRPK1	protein_coding	102	31	643	NA	NA	NA	NA	27
ELAVL1	ENSG00000105176	URI1	protein_coding	100	29	641	NA	NA	NA	NA	25
ELAVL1	ENSG00000135655	USP15	protein_coding	186	26	641	NA	NA	NA	NA	18
ELAVL1	ENSG00000163527	STT3B	protein_coding	138	29	641	NA	NA	NA	NA	20
ELAVL1	ENSG00000180357	ZNF609	protein_coding	160	25	641	NA	NA	-0.281	NA	25
ELAVL1	ENSG00000044115	CTNNA1	protein_coding	158	29	640	NA	NA	NA	NA	22
ELAVL1	ENSG00000165632	TAF3	protein_coding	159	26	640	NA	NA	NA	NA	25
ELAVL1	ENSG00000135540	NHSL1	protein_coding	184	29	637	NA	NA	NA	NA	16
ELAVL1	ENSG00000168214	RBPJ	protein_coding	136	33	637	NA	NA	NA	NA	17
ELAVL1	ENSG00000182247	UBE2E2	protein_coding	226	27	637	NA	NA	NA	NA	9
ELAVL1	ENSG00000204217	BMPR2	protein_coding	134	27	637	NA	NA	NA	NA	18
ELAVL1	ENSG00000184220	CMSS1	protein_coding	245	26	636	NA	NA	NA	NA	25
ELAVL1	ENSG00000119778	ATAD2B	protein_coding	166	24	635	NA	NA	NA	NA	25
ELAVL1	ENSG00000173064	HECTD4	protein_coding	200	24	635	NA	NA	NA	NA	26
ELAVL1	ENSG00000175115	PACS1	protein_coding	152	26	633	NA	NA	NA	NA	14
ELAVL1	ENSG00000165671	NSD1	protein_coding	155	29	632	NA	NA	-3.742	NA	25
ELAVL1	ENSG00000147862	NFIB	protein_coding	193	30	631	NA	NA	NA	NA	13
ELAVL1	ENSG00000164808	SPIDR	protein_coding	192	28	631	NA	NA	NA	-0.243	22
ELAVL1	ENSG00000112701	SENP6	protein_coding	129	26	629	NA	NA	NA	NA	26
ELAVL1	ENSG00000127928	GNGT1	protein_coding	221	23	627	NA	NA	NA	NA	9
ELAVL1	ENSG00000141027	NCOR1	protein_coding	188	29	627	NA	NA	NA	-0.162	24
ELAVL1	ENSG00000148120	AOPEP	protein_coding	218	28	626	NA	NA	NA	NA	14
ELAVL1	ENSG00000106443	PHF14	protein_coding	173	26	625	NA	NA	NA	-0.353	23
ELAVL1	ENSG00000153046	CDYL	protein_coding	152	27	624	NA	NA	NA	NA	27
ELAVL1	ENSG00000106462	EZH2	protein_coding	110	24	620	NA	NA	NA	NA	28
ELAVL1	ENSG00000131051	RBM39	protein_coding	49	32	620	NA	NA	-0.165	NA	27
ELAVL1	ENSG00000230124	ACBD6	protein_coding	195	28	620	NA	NA	NA	NA	26
ELAVL1	ENSG00000136709	WDR33	protein_coding	138	31	619	NA	NA	NA	NA	28
ELAVL1	ENSG00000052126	PLEKHA5	protein_coding	186	28	617	NA	NA	NA	NA	21
ELAVL1	ENSG00000145996	CDKAL1	protein_coding	303	31	613	NA	NA	NA	NA	26
ELAVL1	ENSG00000114439	BBX	protein_coding	206	29	612	NA	NA	NA	NA	20
ELAVL1	ENSG00000144357	UBR3	protein_coding	234	29	612	NA	NA	NA	-0.3	20
ELAVL1	ENSG00000279765	AC013394.1	protein_coding	82	29	609	NA	NA	NA	NA	17
ELAVL1	ENSG00000198900	TOP1	protein_coding	130	31	608	NA	NA	NA	NA	28
ELAVL1	ENSG00000197157	SND1	protein_coding	278	29	605	NA	NA	0.138	NA	22
ELAVL1	ENSG00000143614	GATAD2B	protein_coding	99	33	604	NA	NA	NA	NA	28
ELAVL1	ENSG00000173473	SMARCC1	protein_coding	187	30	603	NA	NA	NA	-0.169	28
ELAVL1	ENSG00000134283	PPHLN1	protein_coding	161	29	602	NA	NA	NA	NA	28
ELAVL1	ENSG00000162959	MEMO1	protein_coding	175	26	602	NA	NA	NA	NA	27
ELAVL1	ENSG00000149187	CELF1	protein_coding	103	35	601	NA	NA	NA	0.154	26
ELAVL1	ENSG00000150760	DOCK1	protein_coding	177	25	599	NA	NA	NA	NA	21
ELAVL1	ENSG00000136770	DNAJC1	protein_coding	183	25	598	NA	NA	NA	NA	14
ELAVL1	ENSG00000108021	TASOR2	protein_coding	98	32	597	NA	NA	NA	NA	25
ELAVL1	ENSG00000123352	SPATS2	protein_coding	157	27	595	NA	NA	NA	NA	28
ELAVL1	ENSG00000112242	E2F3	protein_coding	106	29	594	NA	NA	NA	NA	30
ELAVL1	ENSG00000284461	AC027644.4	protein_coding	142	22	593	NA	NA	NA	NA	0
ELAVL1	ENSG00000104408	EIF3E	protein_coding	122	29	589	NA	NA	NA	NA	21
ELAVL1	ENSG00000101849	TBL1X	protein_coding	195	28	586	NA	NA	NA	-0.275	17
ELAVL1	ENSG00000111300	NAA25	protein_coding	101	30	585	NA	NA	NA	0.209	28
ELAVL1	ENSG00000182985	CADM1	protein_coding	221	25	585	NA	NA	NA	NA	13
ELAVL1	ENSG00000243927	MRPS6	protein_coding	96	31	585	NA	NA	NA	NA	18
ELAVL1	ENSG00000164329	TENT2	protein_coding	100	29	584	NA	NA	NA	NA	22
ELAVL1	ENSG00000204406	MBD5	protein_coding	226	24	581	NA	NA	NA	NA	24
ELAVL1	ENSG00000070961	ATP2B1	protein_coding	134	27	578	NA	NA	NA	NA	24
ELAVL1	ENSG00000157985	AGAP1	protein_coding	180	24	576	NA	NA	-0.162	NA	20
ELAVL1	ENSG00000170142	UBE2E1	protein_coding	100	26	576	NA	NA	NA	NA	20
ELAVL1	ENSG00000161813	LARP4	protein_coding	85	32	575	NA	NA	NA	NA	24
ELAVL1	ENSG00000177694	NAALADL2	protein_coding	260	24	575	NA	NA	NA	NA	12
ELAVL1	ENSG00000169851	PCDH7	protein_coding	282	28	574	NA	NA	NA	NA	20
ELAVL1	ENSG00000185352	HS6ST3	protein_coding	215	25	571	NA	NA	NA	NA	17
ELAVL1	ENSG00000075420	FNDC3B	protein_coding	217	30	570	NA	NA	NA	NA	16
ELAVL1	ENSG00000108854	SMURF2	protein_coding	139	24	570	NA	NA	NA	NA	24
ELAVL1	ENSG00000217128	FNIP1	protein_coding	138	30	566	NA	NA	NA	NA	18
ELAVL1	ENSG00000103194	USP10	protein_coding	102	29	565	NA	NA	NA	NA	30
ELAVL1	ENSG00000146463	ZMYM4	protein_coding	169	27	563	NA	NA	-0.219	-0.225	28
ELAVL1	ENSG00000166225	FRS2	protein_coding	119	25	563	NA	NA	NA	NA	21
ELAVL1	ENSG00000270800	RPS10-NUDT3	protein_coding	177	34	563	NA	NA	NA	NA	17
ELAVL1	ENSG00000153310	CYRIB	protein_coding	147	28	561	NA	NA	NA	NA	21
ELAVL1	ENSG00000164134	NAA15	protein_coding	145	28	561	NA	NA	NA	NA	29
ELAVL1	ENSG00000169862	CTNND2	protein_coding	193	21	560	NA	NA	NA	NA	17
ELAVL1	ENSG00000115109	EPB41L5	protein_coding	118	22	559	NA	NA	NA	NA	19
ELAVL1	ENSG00000151150	ANK3	protein_coding	191	23	559	NA	NA	NA	NA	10
ELAVL1	ENSG00000109606	DHX15	protein_coding	86	28	558	NA	NA	NA	NA	28
ELAVL1	ENSG00000141367	CLTC	protein_coding	102	31	558	NA	NA	0.104	NA	23
ELAVL1	ENSG00000106554	CHCHD3	protein_coding	250	25	557	NA	NA	NA	NA	27
ELAVL1	ENSG00000173889	PHC3	protein_coding	112	29	557	NA	NA	NA	0.314	17
ELAVL1	ENSG00000135679	MDM2	protein_coding	51	34	556	NA	NA	0.177	NA	17
ELAVL1	ENSG00000184863	RBM33	protein_coding	159	29	554	NA	NA	NA	NA	23
ELAVL1	ENSG00000086758	HUWE1	protein_coding	166	28	553	NA	NA	NA	NA	23
ELAVL1	ENSG00000113712	CSNK1A1	protein_coding	72	33	552	NA	NA	NA	NA	23
ELAVL1	ENSG00000118200	CAMSAP2	protein_coding	139	27	551	NA	NA	NA	NA	19
ELAVL1	ENSG00000167632	TRAPPC9	protein_coding	193	24	551	NA	NA	NA	NA	20
ELAVL1	ENSG00000164327	RICTOR	protein_coding	139	28	550	NA	NA	NA	0.334	15
ELAVL1	ENSG00000135525	MAP7	protein_coding	164	26	548	NA	NA	NA	NA	16
ELAVL1	ENSG00000218336	TENM3	protein_coding	326	21	544	NA	NA	NA	NA	15
ELAVL1	ENSG00000153827	TRIP12	protein_coding	174	27	543	NA	NA	0.103	NA	22
ELAVL1	ENSG00000115392	FANCL	protein_coding	105	23	542	NA	NA	-0.354	NA	28
ELAVL1	ENSG00000269955	FMC1-LUC7L2	protein_coding	89	33	542	NA	NA	NA	-0.362	9
ELAVL1	ENSG00000033800	PIAS1	protein_coding	148	27	541	NA	NA	NA	NA	17
ELAVL1	ENSG00000075413	MARK3	protein_coding	149	29	541	NA	NA	NA	0.148	20
ELAVL1	ENSG00000186187	ZNRF1	protein_coding	113	23	541	NA	NA	NA	NA	17
ELAVL1	ENSG00000198162	MAN1A2	protein_coding	123	27	541	NA	NA	NA	NA	20
ELAVL1	ENSG00000123200	ZC3H13	protein_coding	111	29	538	NA	NA	NA	-0.342	23
ELAVL1	ENSG00000061676	NCKAP1	protein_coding	152	25	537	NA	NA	NA	NA	21
ELAVL1	ENSG00000185420	SMYD3	protein_coding	211	25	537	NA	NA	NA	-0.344	14
ELAVL1	ENSG00000132849	PATJ	protein_coding	168	24	536	NA	NA	NA	NA	16
ELAVL1	ENSG00000198087	CD2AP	protein_coding	157	28	535	NA	NA	NA	-0.17	22
ELAVL1	ENSG00000015479	MATR3	protein_coding	52	33	532	NA	NA	NA	NA	20
ELAVL1	ENSG00000066084	DIP2B	protein_coding	150	23	531	NA	NA	NA	NA	22
ELAVL1	ENSG00000132953	XPO4	protein_coding	132	30	531	NA	NA	NA	NA	26
ELAVL1	ENSG00000124789	NUP153	protein_coding	122	30	530	NA	NA	NA	NA	27
ELAVL1	ENSG00000250312	ZNF718	protein_coding	88	27	529	NA	NA	NA	NA	18
ELAVL1	ENSG00000197969	VPS13A	protein_coding	180	26	528	NA	NA	NA	NA	20
ELAVL1	ENSG00000065883	CDK13	protein_coding	130	27	527	NA	NA	NA	NA	27
ELAVL1	ENSG00000198586	TLK1	protein_coding	163	31	527	NA	NA	NA	NA	25
ELAVL1	ENSG00000121101	TEX14	protein_coding	125	26	526	NA	NA	NA	NA	11
ELAVL1	ENSG00000187079	TEAD1	protein_coding	213	27	526	NA	NA	NA	NA	26
ELAVL1	ENSG00000151414	NEK7	protein_coding	148	28	525	NA	NA	NA	NA	18
ELAVL1	ENSG00000124486	USP9X	protein_coding	184	29	523	NA	NA	NA	NA	21
ELAVL1	ENSG00000145012	LPP	protein_coding	152	29	523	NA	NA	NA	NA	17
ELAVL1	ENSG00000180530	NRIP1	protein_coding	125	24	523	NA	NA	NA	NA	19
ELAVL1	ENSG00000182263	FIGN	protein_coding	134	24	523	NA	NA	NA	NA	12
ELAVL1	ENSG00000120690	ELF1	protein_coding	101	27	522	NA	NA	NA	NA	18
ELAVL1	ENSG00000141867	BRD4	protein_coding	105	36	522	NA	NA	NA	NA	29
ELAVL1	ENSG00000196914	ARHGEF12	protein_coding	145	28	521	NA	NA	NA	NA	18
ELAVL1	ENSG00000271949	AC093423.3	protein_coding	182	25	521	NA	NA	NA	NA	2
ELAVL1	ENSG00000148737	TCF7L2	protein_coding	136	27	520	NA	NA	NA	NA	15
ELAVL1	ENSG00000188580	NKAIN2	protein_coding	308	20	520	NA	NA	NA	NA	13
ELAVL1	ENSG00000146143	PRIM2	protein_coding	187	26	519	NA	NA	NA	NA	30
ELAVL1	ENSG00000172845	SP3	protein_coding	95	30	519	NA	NA	NA	NA	26
ELAVL1	ENSG00000113649	TCERG1	protein_coding	82	30	518	NA	NA	NA	0.183	29
ELAVL1	ENSG00000100354	TNRC6B	protein_coding	157	33	517	NA	NA	NA	NA	27
ELAVL1	ENSG00000125107	CNOT1	protein_coding	147	30	517	NA	NA	NA	-0.129	24
ELAVL1	ENSG00000173120	KDM2A	protein_coding	116	24	516	NA	NA	NA	NA	21
ELAVL1	ENSG00000101752	MIB1	protein_coding	136	29	514	NA	NA	NA	NA	25
ELAVL1	ENSG00000101639	CEP192	protein_coding	129	25	513	NA	NA	NA	NA	27
ELAVL1	ENSG00000166446	CDYL2	protein_coding	141	24	513	NA	NA	NA	NA	15
ELAVL1	ENSG00000126777	KTN1	protein_coding	152	26	512	NA	NA	NA	NA	23
ELAVL1	ENSG00000137501	SYTL2	protein_coding	128	16	512	NA	NA	NA	NA	12
ELAVL1	ENSG00000176102	CSTF3	protein_coding	103	32	512	NA	NA	NA	NA	31
ELAVL1	ENSG00000254996	ANKHD1-EIF4EBP3	protein_coding	166	29	512	NA	NA	-1.074	-0.714	9
ELAVL1	ENSG00000101126	ADNP	protein_coding	60	29	509	NA	NA	NA	NA	29
ELAVL1	ENSG00000141380	SS18	protein_coding	89	30	507	NA	NA	NA	NA	23
ELAVL1	ENSG00000152061	RABGAP1L	protein_coding	204	28	507	NA	NA	NA	NA	12
ELAVL1	ENSG00000163539	CLASP2	protein_coding	193	26	506	NA	NA	NA	NA	22
ELAVL1	ENSG00000253729	PRKDC	protein_coding	190	28	506	NA	NA	NA	NA	28
ELAVL1	ENSG00000184305	CCSER1	protein_coding	218	27	505	NA	NA	NA	NA	15
ELAVL1	ENSG00000258677	AC022826.2	protein_coding	150	32	504	NA	NA	NA	NA	4
ELAVL1	ENSG00000134371	CDC73	protein_coding	141	27	503	NA	NA	NA	NA	24
ELAVL1	ENSG00000197275	RAD54B	protein_coding	106	27	502	NA	NA	NA	NA	28
ELAVL1	ENSG00000153774	CFDP1	protein_coding	124	27	501	NA	NA	NA	NA	20
ELAVL1	ENSG00000072803	FBXW11	protein_coding	150	26	499	NA	NA	NA	NA	21
ELAVL1	ENSG00000131503	ANKHD1	protein_coding	158	28	498	NA	NA	NA	0.203	16
ELAVL1	ENSG00000158987	RAPGEF6	protein_coding	190	25	498	NA	NA	NA	NA	21
ELAVL1	ENSG00000163110	PDLIM5	protein_coding	143	28	498	NA	NA	NA	NA	15
ELAVL1	ENSG00000102780	DGKH	protein_coding	138	25	497	NA	NA	NA	NA	13
ELAVL1	ENSG00000115904	SOS1	protein_coding	160	25	497	NA	NA	NA	-0.255	24
ELAVL1	ENSG00000185842	DNAH14	protein_coding	200	21	497	NA	NA	NA	NA	18
ELAVL1	ENSG00000271793	AL589666.1	protein_coding	69	31	495	NA	NA	NA	-0.863	7
ELAVL1	ENSG00000106603	COA1	protein_coding	137	24	493	NA	NA	NA	NA	20
ELAVL1	ENSG00000171530	TBCA	protein_coding	127	29	493	NA	NA	NA	NA	19
ELAVL1	ENSG00000174373	RALGAPA1	protein_coding	185	21	493	NA	NA	NA	NA	20
ELAVL1	ENSG00000011566	MAP4K3	protein_coding	182	23	492	NA	NA	NA	NA	21
ELAVL1	ENSG00000075785	RAB7A	protein_coding	103	29	492	NA	NA	NA	-0.192	13
ELAVL1	ENSG00000151914	DST	protein_coding	191	30	492	NA	NA	NA	NA	14
ELAVL1	ENSG00000109685	NSD2	protein_coding	101	29	491	NA	NA	-0.292	0.197	30
ELAVL1	ENSG00000070756	PABPC1	protein_coding	53	28	489	NA	NA	0.162	NA	23
ELAVL1	ENSG00000075539	FRYL	protein_coding	163	25	488	NA	NA	NA	NA	17
ELAVL1	ENSG00000185737	NRG3	protein_coding	186	22	488	NA	NA	NA	NA	13
ELAVL1	ENSG00000285542	AC013717.1	protein_coding	107	30	487	NA	NA	NA	NA	0
ELAVL1	ENSG00000114346	ECT2	protein_coding	99	28	486	NA	NA	NA	NA	30
ELAVL1	ENSG00000134318	ROCK2	protein_coding	164	27	486	NA	NA	NA	NA	20
ELAVL1	ENSG00000122566	HNRNPA2B1	protein_coding	46	33	485	NA	NA	NA	NA	29
ELAVL1	ENSG00000106723	SPIN1	protein_coding	101	30	483	NA	NA	NA	NA	27
ELAVL1	ENSG00000140153	WDR20	protein_coding	116	23	483	NA	NA	NA	NA	19
ELAVL1	ENSG00000091039	OSBPL8	protein_coding	153	27	482	NA	NA	NA	NA	18
ELAVL1	ENSG00000163125	RPRD2	protein_coding	102	29	482	NA	NA	NA	NA	29
ELAVL1	ENSG00000125386	FAM193A	protein_coding	147	25	481	NA	NA	NA	NA	25
ELAVL1	ENSG00000172915	NBEA	protein_coding	212	26	481	NA	NA	NA	NA	21
ELAVL1	ENSG00000058673	ZC3H11A	protein_coding	76	30	480	NA	NA	NA	NA	24
ELAVL1	ENSG00000073417	PDE8A	protein_coding	128	25	480	NA	NA	NA	-0.276	14
ELAVL1	ENSG00000257315	ZBED6	protein_coding	76	30	480	NA	NA	NA	0.584	19
ELAVL1	ENSG00000160007	ARHGAP35	protein_coding	107	24	479	NA	NA	-0.132	NA	20
ELAVL1	ENSG00000204120	GIGYF2	protein_coding	176	27	477	NA	NA	NA	NA	25
ELAVL1	ENSG00000170017	ALCAM	protein_coding	136	25	475	NA	NA	NA	NA	13
ELAVL1	ENSG00000065559	MAP2K4	protein_coding	123	23	474	NA	NA	NA	NA	22
ELAVL1	ENSG00000120802	TMPO	protein_coding	37	33	474	NA	NA	NA	NA	30
ELAVL1	ENSG00000136141	LRCH1	protein_coding	163	24	472	NA	NA	NA	NA	17
ELAVL1	ENSG00000164597	COG5	protein_coding	237	21	472	NA	NA	NA	0.197	18
ELAVL1	ENSG00000143442	POGZ	protein_coding	81	28	471	NA	NA	NA	NA	24
ELAVL1	ENSG00000163714	U2SURP	protein_coding	66	30	471	NA	NA	NA	NA	28
ELAVL1	ENSG00000065243	PKN2	protein_coding	149	30	470	NA	NA	NA	NA	20
ELAVL1	ENSG00000070950	RAD18	protein_coding	158	26	470	NA	NA	NA	NA	28
ELAVL1	ENSG00000164924	YWHAZ	protein_coding	52	28	470	NA	NA	0.123	NA	22
ELAVL1	ENSG00000221914	PPP2R2A	protein_coding	98	26	470	NA	NA	NA	NA	19
ELAVL1	ENSG00000135316	SYNCRIP	protein_coding	44	33	468	NA	NA	NA	NA	29
ELAVL1	ENSG00000171735	CAMTA1	protein_coding	234	34	468	NA	NA	NA	NA	17
ELAVL1	ENSG00000108256	NUFIP2	protein_coding	43	32	467	NA	NA	NA	0.16	23
ELAVL1	ENSG00000261115	TMEM178B	protein_coding	131	24	467	NA	NA	NA	NA	10
ELAVL1	ENSG00000092140	G2E3	protein_coding	76	28	466	NA	NA	NA	NA	26
ELAVL1	ENSG00000101972	STAG2	protein_coding	183	26	466	NA	NA	NA	NA	24
ELAVL1	ENSG00000108100	CCNY	protein_coding	159	30	466	NA	NA	NA	-0.259	22
ELAVL1	ENSG00000163605	PPP4R2	protein_coding	98	32	466	NA	NA	NA	0.212	25
ELAVL1	ENSG00000163681	SLMAP	protein_coding	159	28	465	NA	NA	NA	NA	19
ELAVL1	ENSG00000196428	TSC22D2	protein_coding	90	28	465	NA	NA	NA	NA	22
ELAVL1	ENSG00000197111	PCBP2	protein_coding	33	35	464	NA	NA	NA	0.165	24
ELAVL1	ENSG00000007168	PAFAH1B1	protein_coding	105	31	463	NA	NA	NA	NA	18
ELAVL1	ENSG00000060339	CCAR1	protein_coding	90	27	463	NA	NA	NA	NA	29
ELAVL1	ENSG00000173933	RBM4	protein_coding	37	27	463	NA	NA	NA	NA	26
ELAVL1	ENSG00000254995	STX16-NPEPL1	protein_coding	42	28	463	NA	NA	-0.447	NA	15
ELAVL1	ENSG00000072364	AFF4	protein_coding	103	28	462	NA	NA	NA	NA	21
ELAVL1	ENSG00000138780	GSTCD	protein_coding	112	25	461	NA	NA	NA	NA	25
ELAVL1	ENSG00000145687	SSBP2	protein_coding	189	21	461	NA	NA	NA	NA	20
ELAVL1	ENSG00000114416	FXR1	protein_coding	83	30	459	NA	NA	NA	0.19	25
ELAVL1	ENSG00000005810	MYCBP2	protein_coding	223	21	457	NA	NA	NA	-0.26	15
ELAVL1	ENSG00000130396	AFDN	protein_coding	152	25	457	NA	NA	NA	NA	20
ELAVL1	ENSG00000272325	NUDT3	protein_coding	139	34	457	NA	NA	0.18	NA	21
ELAVL1	ENSG00000010810	FYN	protein_coding	197	14	456	NA	NA	NA	NA	12
ELAVL1	ENSG00000107779	BMPR1A	protein_coding	122	27	456	NA	NA	NA	NA	22
ELAVL1	ENSG00000116106	EPHA4	protein_coding	111	23	456	NA	NA	NA	NA	16
ELAVL1	ENSG00000138709	LARP1B	protein_coding	134	27	456	NA	NA	0.185	NA	23
ELAVL1	ENSG00000145375	SPATA5	protein_coding	201	27	456	NA	NA	NA	NA	28
ELAVL1	ENSG00000175029	CTBP2	protein_coding	128	25	456	NA	NA	NA	NA	20
ELAVL1	ENSG00000033867	SLC4A7	protein_coding	113	28	455	NA	NA	NA	NA	19
ELAVL1	ENSG00000086200	IPO11	protein_coding	193	28	455	NA	NA	NA	NA	22
ELAVL1	ENSG00000051341	POLQ	protein_coding	118	20	454	NA	NA	NA	NA	30
ELAVL1	ENSG00000080608	PUM3	protein_coding	136	29	454	NA	NA	NA	NA	27
ELAVL1	ENSG00000100852	ARHGAP5	protein_coding	90	30	454	NA	NA	NA	NA	20
ELAVL1	ENSG00000138032	PPM1B	protein_coding	89	26	454	NA	NA	NA	NA	26
ELAVL1	ENSG00000143970	ASXL2	protein_coding	125	26	454	NA	NA	NA	NA	22
ELAVL1	ENSG00000158636	EMSY	protein_coding	114	23	454	NA	NA	NA	NA	24
ELAVL1	ENSG00000276418	AC036214.3	protein_coding	141	26	454	NA	NA	NA	NA	19
ELAVL1	ENSG00000288534	AP001931.2	protein_coding	100	31	454	NA	NA	NA	NA	0
ELAVL1	ENSG00000101596	SMCHD1	protein_coding	139	26	453	NA	NA	NA	NA	22
ELAVL1	ENSG00000182095	TNRC18	protein_coding	91	23	453	NA	NA	NA	NA	25
ELAVL1	ENSG00000288643	AC114982.2	protein_coding	197	27	453	NA	NA	NA	NA	0
ELAVL1	ENSG00000108384	RAD51C	protein_coding	62	27	452	NA	NA	NA	NA	29
ELAVL1	ENSG00000157764	BRAF	protein_coding	178	26	452	NA	NA	NA	0.227	21
ELAVL1	ENSG00000119522	DENND1A	protein_coding	183	25	451	NA	NA	NA	NA	24
ELAVL1	ENSG00000153936	HS2ST1	protein_coding	149	26	451	NA	NA	0.159	NA	24
ELAVL1	ENSG00000154710	RABGEF1	protein_coding	113	21	451	NA	NA	NA	0.24	12
ELAVL1	ENSG00000171492	LRRC8D	protein_coding	145	26	451	NA	NA	NA	NA	23
ELAVL1	ENSG00000173273	TNKS	protein_coding	180	27	451	NA	NA	NA	NA	22
ELAVL1	ENSG00000197601	FAR1	protein_coding	80	30	451	NA	NA	NA	0.215	23
ELAVL1	ENSG00000082996	RNF13	protein_coding	143	27	450	NA	NA	NA	NA	15
ELAVL1	ENSG00000047849	MAP4	protein_coding	168	32	449	NA	NA	NA	NA	12
ELAVL1	ENSG00000123106	CCDC91	protein_coding	213	26	449	NA	NA	NA	-0.398	20
ELAVL1	ENSG00000144036	EXOC6B	protein_coding	196	26	449	NA	NA	NA	NA	17
ELAVL1	ENSG00000155313	USP25	protein_coding	159	22	449	NA	NA	NA	-0.208	16
ELAVL1	ENSG00000196305	IARS1	protein_coding	91	28	449	NA	NA	NA	NA	28
ELAVL1	ENSG00000163811	WDR43	protein_coding	74	30	448	NA	NA	NA	NA	28
ELAVL1	ENSG00000215421	ZNF407	protein_coding	196	23	448	NA	NA	NA	NA	23
ELAVL1	ENSG00000079246	XRCC5	protein_coding	124	28	447	NA	NA	0.169	NA	29
ELAVL1	ENSG00000112200	ZNF451	protein_coding	101	29	447	NA	NA	NA	NA	23
ELAVL1	ENSG00000172292	CERS6	protein_coding	140	26	447	NA	NA	-0.161	NA	24
ELAVL1	ENSG00000087095	NLK	protein_coding	113	29	446	NA	NA	-0.292	-0.428	24
ELAVL1	ENSG00000089902	RCOR1	protein_coding	124	27	446	NA	NA	NA	0.181	26
ELAVL1	ENSG00000153922	CHD1	protein_coding	97	27	446	NA	NA	NA	NA	23
ELAVL1	ENSG00000181555	SETD2	protein_coding	143	25	446	NA	NA	NA	NA	22
ELAVL1	ENSG00000080345	RIF1	protein_coding	113	28	444	NA	NA	NA	NA	28
ELAVL1	ENSG00000127314	RAP1B	protein_coding	77	30	444	NA	NA	NA	NA	18
ELAVL1	ENSG00000182831	C16orf72	protein_coding	36	33	444	NA	NA	NA	0.297	21
ELAVL1	ENSG00000175387	SMAD2	protein_coding	133	27	443	NA	NA	NA	NA	24
ELAVL1	ENSG00000084676	NCOA1	protein_coding	146	26	442	NA	NA	NA	NA	21
ELAVL1	ENSG00000095564	BTAF1	protein_coding	131	26	442	NA	NA	NA	NA	20
ELAVL1	ENSG00000112319	EYA4	protein_coding	238	17	441	NA	NA	NA	NA	12
ELAVL1	ENSG00000152894	PTPRK	protein_coding	142	26	441	NA	NA	NA	NA	13
ELAVL1	ENSG00000084733	RAB10	protein_coding	102	29	439	NA	NA	NA	-0.117	23
ELAVL1	ENSG00000114857	NKTR	protein_coding	55	25	439	NA	NA	NA	NA	17
ELAVL1	ENSG00000144674	GOLGA4	protein_coding	146	27	439	NA	NA	NA	NA	22
ELAVL1	ENSG00000146426	TIAM2	protein_coding	100	28	439	NA	NA	NA	NA	18
ELAVL1	ENSG00000146555	SDK1	protein_coding	201	23	438	NA	NA	NA	NA	12
ELAVL1	ENSG00000071205	ARHGAP10	protein_coding	134	22	437	NA	NA	NA	NA	11
ELAVL1	ENSG00000184903	IMMP2L	protein_coding	195	22	437	NA	NA	NA	NA	11
ELAVL1	ENSG00000048649	RSF1	protein_coding	128	26	435	NA	NA	NA	NA	25
ELAVL1	ENSG00000078304	PPP2R5C	protein_coding	118	28	435	NA	NA	NA	0.266	18
ELAVL1	ENSG00000115839	RAB3GAP1	protein_coding	129	25	435	NA	NA	NA	NA	23
ELAVL1	ENSG00000130338	TULP4	protein_coding	138	30	435	NA	NA	NA	NA	24
ELAVL1	ENSG00000157837	SPPL3	protein_coding	153	27	435	NA	NA	NA	NA	22
ELAVL1	ENSG00000088930	XRN2	protein_coding	112	29	434	NA	NA	NA	-0.18	27
ELAVL1	ENSG00000092108	SCFD1	protein_coding	122	23	434	NA	NA	NA	NA	21
ELAVL1	ENSG00000139514	SLC7A1	protein_coding	110	34	434	NA	NA	NA	NA	23
ELAVL1	ENSG00000074054	CLASP1	protein_coding	190	24	432	NA	NA	NA	NA	27
ELAVL1	ENSG00000135837	CEP350	protein_coding	163	22	432	NA	NA	NA	NA	21
ELAVL1	ENSG00000143324	XPR1	protein_coding	169	28	430	NA	NA	NA	NA	20
ELAVL1	ENSG00000171044	XKR6	protein_coding	161	21	430	NA	NA	NA	NA	15
ELAVL1	ENSG00000100201	DDX17	protein_coding	25	35	429	NA	NA	NA	NA	20
ELAVL1	ENSG00000104343	UBE2W	protein_coding	111	29	429	NA	NA	NA	NA	22
ELAVL1	ENSG00000109332	UBE2D3	protein_coding	69	31	428	NA	NA	NA	NA	21
ELAVL1	ENSG00000113569	NUP155	protein_coding	94	33	428	NA	NA	NA	NA	29
ELAVL1	ENSG00000127022	CANX	protein_coding	39	33	428	NA	NA	0.159	NA	19
ELAVL1	ENSG00000143322	ABL2	protein_coding	138	24	428	NA	NA	NA	NA	19
ELAVL1	ENSG00000153317	ASAP1	protein_coding	160	30	428	NA	NA	NA	NA	18
ELAVL1	ENSG00000101144	BMP7	protein_coding	82	21	427	NA	NA	NA	NA	11
ELAVL1	ENSG00000143376	SNX27	protein_coding	81	27	427	NA	NA	NA	NA	28
ELAVL1	ENSG00000196586	MYO6	protein_coding	125	25	427	NA	NA	0.299	NA	15
ELAVL1	ENSG00000062194	GPBP1	protein_coding	115	32	426	NA	NA	NA	NA	25
ELAVL1	ENSG00000108061	SHOC2	protein_coding	98	29	425	NA	NA	NA	NA	20
ELAVL1	ENSG00000119707	RBM25	protein_coding	82	30	424	NA	NA	NA	-0.118	25
ELAVL1	ENSG00000123636	BAZ2B	protein_coding	139	31	424	NA	NA	NA	NA	21
ELAVL1	ENSG00000124222	STX16	protein_coding	30	27	424	NA	NA	NA	NA	19
ELAVL1	ENSG00000114062	UBE3A	protein_coding	111	31	423	NA	NA	NA	NA	24
ELAVL1	ENSG00000196562	SULF2	protein_coding	106	20	423	NA	NA	NA	NA	17
ELAVL1	ENSG00000117713	ARID1A	protein_coding	90	27	422	NA	NA	NA	NA	25
ELAVL1	ENSG00000187164	SHTN1	protein_coding	105	28	422	NA	NA	NA	NA	17
ELAVL1	ENSG00000086666	ZFAND6	protein_coding	100	24	421	NA	NA	NA	NA	19
ELAVL1	ENSG00000170035	UBE2E3	protein_coding	108	21	421	NA	NA	NA	NA	23
ELAVL1	ENSG00000004866	ST7	protein_coding	170	23	420	NA	NA	NA	NA	17
ELAVL1	ENSG00000136536	MARCHF7	protein_coding	83	28	420	NA	NA	NA	NA	21
ELAVL1	ENSG00000135049	AGTPBP1	protein_coding	161	27	419	NA	NA	NA	NA	23
ELAVL1	ENSG00000163602	RYBP	protein_coding	82	26	419	NA	NA	NA	NA	21
ELAVL1	ENSG00000182670	TTC3	protein_coding	115	30	419	NA	NA	NA	NA	23
ELAVL1	ENSG00000196588	MRTFA	protein_coding	178	25	419	NA	NA	NA	NA	11
ELAVL1	ENSG00000059758	CDK17	protein_coding	121	25	418	NA	NA	NA	NA	22
ELAVL1	ENSG00000106771	TMEM245	protein_coding	105	30	418	NA	NA	NA	NA	19
ELAVL1	ENSG00000111605	CPSF6	protein_coding	38	30	418	NA	NA	NA	NA	30
ELAVL1	ENSG00000164199	ADGRV1	protein_coding	193	21	418	NA	NA	NA	NA	13
ELAVL1	ENSG00000094916	CBX5	protein_coding	47	32	416	NA	NA	NA	NA	31
ELAVL1	ENSG00000119685	TTLL5	protein_coding	172	26	416	NA	NA	NA	NA	26
ELAVL1	ENSG00000125676	THOC2	protein_coding	141	28	415	NA	NA	NA	NA	26
ELAVL1	ENSG00000135317	SNX14	protein_coding	89	26	415	NA	NA	NA	NA	20
ELAVL1	ENSG00000163349	HIPK1	protein_coding	63	26	415	NA	NA	NA	NA	25
ELAVL1	ENSG00000196208	GREB1	protein_coding	111	21	415	NA	NA	NA	NA	11
ELAVL1	ENSG00000198879	SFMBT2	protein_coding	192	17	414	NA	NA	NA	NA	14
ELAVL1	ENSG00000039123	MTREX	protein_coding	128	22	413	NA	NA	NA	NA	23
ELAVL1	ENSG00000100614	PPM1A	protein_coding	74	27	413	NA	NA	NA	0.286	18
ELAVL1	ENSG00000008294	SPAG9	protein_coding	153	30	412	NA	NA	NA	0.28	19
ELAVL1	ENSG00000108506	INTS2	protein_coding	79	25	412	NA	NA	NA	NA	29
ELAVL1	ENSG00000143164	DCAF6	protein_coding	149	26	412	NA	NA	NA	NA	20
ELAVL1	ENSG00000165185	KIAA1958	protein_coding	108	27	412	NA	NA	NA	NA	22
ELAVL1	ENSG00000090863	GLG1	protein_coding	113	27	411	NA	NA	0.129	NA	19
ELAVL1	ENSG00000101333	PLCB4	protein_coding	137	19	411	NA	NA	NA	NA	13
ELAVL1	ENSG00000146918	NCAPG2	protein_coding	86	30	410	NA	NA	NA	0.211	29
ELAVL1	ENSG00000118482	PHF3	protein_coding	148	28	409	NA	NA	NA	NA	23
ELAVL1	ENSG00000258539	AC068896.1	protein_coding	107	29	409	NA	NA	NA	NA	12
ELAVL1	ENSG00000155561	NUP205	protein_coding	111	27	408	NA	NA	NA	NA	29
ELAVL1	ENSG00000171843	MLLT3	protein_coding	175	27	407	NA	NA	NA	NA	16
ELAVL1	ENSG00000062650	WAPL	protein_coding	115	30	406	NA	NA	NA	NA	25
ELAVL1	ENSG00000198743	SLC5A3	protein_coding	52	30	406	NA	NA	NA	0.539	21
ELAVL1	ENSG00000088448	ANKRD10	protein_coding	49	29	405	NA	NA	NA	NA	16
ELAVL1	ENSG00000113384	GOLPH3	protein_coding	68	32	405	NA	NA	NA	NA	26
ELAVL1	ENSG00000189091	SF3B3	protein_coding	70	30	405	NA	NA	NA	NA	28
ELAVL1	ENSG00000248643	RBM14-RBM4	protein_coding	35	29	404	NA	NA	NA	NA	22
ELAVL1	ENSG00000028203	VEZT	protein_coding	108	27	403	NA	NA	NA	NA	22
ELAVL1	ENSG00000078747	ITCH	protein_coding	161	28	403	NA	NA	NA	NA	23
ELAVL1	ENSG00000104218	CSPP1	protein_coding	136	22	403	NA	NA	NA	-0.287	27
ELAVL1	ENSG00000151338	MIPOL1	protein_coding	182	20	403	NA	NA	NA	NA	15
ELAVL1	ENSG00000198408	OGA	protein_coding	42	30	403	NA	NA	NA	NA	16
ELAVL1	ENSG00000010017	RANBP9	protein_coding	106	24	402	NA	NA	NA	NA	26
ELAVL1	ENSG00000100629	CEP128	protein_coding	179	24	402	NA	NA	NA	NA	27
ELAVL1	ENSG00000123908	AGO2	protein_coding	69	29	402	NA	NA	NA	NA	25
ELAVL1	ENSG00000165209	STRBP	protein_coding	136	26	402	NA	NA	NA	NA	29
ELAVL1	ENSG00000112699	GMDS	protein_coding	207	25	401	NA	NA	NA	NA	14
ELAVL1	ENSG00000116750	UCHL5	protein_coding	67	29	401	NA	NA	NA	NA	28
ELAVL1	ENSG00000119314	PTBP3	protein_coding	99	32	401	NA	NA	NA	NA	24
ELAVL1	ENSG00000132388	UBE2G1	protein_coding	108	29	401	NA	NA	NA	-0.204	27
ELAVL1	ENSG00000138594	TMOD3	protein_coding	84	32	401	NA	NA	NA	NA	18
ELAVL1	ENSG00000162105	SHANK2	protein_coding	121	24	401	NA	NA	NA	NA	12
ELAVL1	ENSG00000180228	PRKRA	protein_coding	21	15	401	NA	NA	NA	NA	27
ELAVL1	ENSG00000076554	TPD52	protein_coding	124	24	400	NA	NA	NA	NA	20
ELAVL1	ENSG00000162613	FUBP1	protein_coding	44	32	400	NA	NA	NA	NA	25
ELAVL1	ENSG00000163629	PTPN13	protein_coding	181	20	400	NA	NA	NA	NA	15
ELAVL1	ENSG00000063978	RNF4	protein_coding	127	25	399	NA	NA	NA	NA	26
ELAVL1	ENSG00000125944	HNRNPR	protein_coding	52	32	399	NA	NA	NA	NA	31
ELAVL1	ENSG00000156650	KAT6B	protein_coding	136	29	399	NA	NA	NA	-0.242	25
ELAVL1	ENSG00000172954	LCLAT1	protein_coding	144	30	399	NA	NA	NA	-0.24	27
ELAVL1	ENSG00000186591	UBE2H	protein_coding	126	28	399	NA	NA	NA	0.414	23
ELAVL1	ENSG00000196284	SUPT3H	protein_coding	190	24	398	NA	NA	NA	NA	20
ELAVL1	ENSG00000163785	RYK	protein_coding	130	28	397	NA	NA	NA	NA	20
ELAVL1	ENSG00000120594	PLXDC2	protein_coding	108	25	396	NA	NA	NA	NA	18
ELAVL1	ENSG00000198625	MDM4	protein_coding	47	29	396	NA	NA	0.34	NA	21
ELAVL1	ENSG00000068784	SRBD1	protein_coding	145	25	394	NA	NA	NA	-0.317	25
ELAVL1	ENSG00000116191	RALGPS2	protein_coding	106	26	394	NA	NA	NA	NA	17
ELAVL1	ENSG00000133858	ZFC3H1	protein_coding	73	25	394	NA	NA	NA	NA	20
ELAVL1	ENSG00000141298	SSH2	protein_coding	154	25	394	NA	NA	NA	NA	18
ELAVL1	ENSG00000171316	CHD7	protein_coding	145	25	394	NA	NA	NA	NA	22
ELAVL1	ENSG00000048991	R3HDM1	protein_coding	143	27	393	NA	NA	NA	-0.493	29
ELAVL1	ENSG00000063046	EIF4B	protein_coding	53	29	393	NA	NA	NA	-0.086	22
ELAVL1	ENSG00000145907	G3BP1	protein_coding	47	32	393	NA	NA	0.106	NA	28
ELAVL1	ENSG00000175216	CKAP5	protein_coding	108	26	393	NA	NA	NA	0.14	29
ELAVL1	ENSG00000117461	PIK3R3	protein_coding	79	23	392	NA	NA	NA	NA	15
ELAVL1	ENSG00000039068	CDH1	protein_coding	105	20	391	NA	NA	NA	NA	13
ELAVL1	ENSG00000283761	AC118553.2	protein_coding	126	30	391	NA	NA	NA	NA	0
ELAVL1	ENSG00000157106	SMG1	protein_coding	94	27	389	NA	NA	NA	NA	23
ELAVL1	ENSG00000198363	ASPH	protein_coding	125	28	389	NA	NA	0.385	NA	14
ELAVL1	ENSG00000005889	ZFX	protein_coding	73	30	388	NA	NA	NA	NA	23
ELAVL1	ENSG00000133302	SLF1	protein_coding	123	26	388	NA	NA	NA	NA	28
ELAVL1	ENSG00000180776	ZDHHC20	protein_coding	79	25	388	NA	NA	NA	NA	23
ELAVL1	ENSG00000005483	KMT2E	protein_coding	125	27	387	NA	NA	NA	-0.254	23
ELAVL1	ENSG00000036257	CUL3	protein_coding	117	22	387	NA	NA	NA	NA	27
ELAVL1	ENSG00000120254	MTHFD1L	protein_coding	155	30	387	NA	NA	NA	NA	22
ELAVL1	ENSG00000154217	PITPNC1	protein_coding	137	21	387	NA	NA	NA	NA	11
ELAVL1	ENSG00000067208	EVI5	protein_coding	184	30	386	NA	NA	NA	NA	16
ELAVL1	ENSG00000106415	GLCCI1	protein_coding	137	26	386	NA	NA	NA	NA	17
ELAVL1	ENSG00000150093	ITGB1	protein_coding	87	29	386	NA	NA	0.217	NA	20
ELAVL1	ENSG00000067900	ROCK1	protein_coding	152	28	385	NA	NA	NA	-0.184	23
ELAVL1	ENSG00000110497	AMBRA1	protein_coding	139	25	385	NA	NA	NA	NA	23
ELAVL1	ENSG00000124207	CSE1L	protein_coding	70	27	385	NA	NA	0.102	NA	30
ELAVL1	ENSG00000166747	AP1G1	protein_coding	92	28	385	NA	NA	NA	NA	19
ELAVL1	ENSG00000198561	CTNND1	protein_coding	67	30	384	NA	NA	NA	NA	20
ELAVL1	ENSG00000155506	LARP1	protein_coding	81	38	383	NA	NA	NA	NA	26
ELAVL1	ENSG00000100320	RBFOX2	protein_coding	162	26	382	NA	NA	NA	NA	23
ELAVL1	ENSG00000147677	EIF3H	protein_coding	126	26	382	NA	NA	0.159	0.144	21
ELAVL1	ENSG00000077147	TM9SF3	protein_coding	85	33	381	NA	NA	NA	NA	20
ELAVL1	ENSG00000111530	CAND1	protein_coding	72	27	381	NA	NA	NA	NA	28
ELAVL1	ENSG00000110367	DDX6	protein_coding	54	32	380	NA	NA	NA	NA	23
ELAVL1	ENSG00000151491	EPS8	protein_coding	135	20	380	NA	NA	0.197	NA	16
ELAVL1	ENSG00000178691	SUZ12	protein_coding	79	29	380	NA	NA	NA	NA	28
ELAVL1	ENSG00000273398	AC017083.3	protein_coding	116	32	380	NA	NA	NA	NA	11
ELAVL1	ENSG00000020577	SAMD4A	protein_coding	115	19	379	NA	NA	NA	0.328	16
ELAVL1	ENSG00000148200	NR6A1	protein_coding	158	23	379	NA	NA	NA	-0.335	17
ELAVL1	ENSG00000151012	SLC7A11	protein_coding	96	26	379	NA	NA	0.362	0.407	12
ELAVL1	ENSG00000151718	WWC2	protein_coding	126	30	379	NA	NA	NA	NA	18
ELAVL1	ENSG00000169905	TOR1AIP2	protein_coding	45	33	379	NA	NA	NA	NA	21
ELAVL1	ENSG00000127483	HP1BP3	protein_coding	52	32	378	NA	NA	0.361	0.822	26
ELAVL1	ENSG00000174485	DENND4A	protein_coding	116	28	378	NA	NA	NA	NA	12
ELAVL1	ENSG00000104413	ESRP1	protein_coding	82	19	377	NA	NA	NA	NA	15
ELAVL1	ENSG00000115310	RTN4	protein_coding	96	28	377	NA	NA	0.178	NA	15
ELAVL1	ENSG00000015171	ZMYND11	protein_coding	74	24	376	NA	NA	NA	NA	16
ELAVL1	ENSG00000107643	MAPK8	protein_coding	98	26	376	NA	NA	NA	NA	22
ELAVL1	ENSG00000145833	DDX46	protein_coding	105	27	376	NA	NA	NA	NA	23
ELAVL1	ENSG00000162695	SLC30A7	protein_coding	96	29	376	NA	NA	NA	NA	19
ELAVL1	ENSG00000168300	PCMTD1	protein_coding	86	27	376	NA	NA	NA	0.293	12
ELAVL1	ENSG00000083535	PIBF1	protein_coding	224	19	375	NA	NA	NA	NA	23
ELAVL1	ENSG00000119318	RAD23B	protein_coding	71	27	375	NA	NA	NA	NA	29
ELAVL1	ENSG00000145743	FBXL17	protein_coding	143	28	375	NA	NA	NA	NA	13
ELAVL1	ENSG00000180957	PITPNB	protein_coding	89	32	375	NA	NA	NA	NA	24
ELAVL1	ENSG00000122042	UBL3	protein_coding	91	24	374	NA	NA	NA	NA	17
ELAVL1	ENSG00000144893	MED12L	protein_coding	135	24	374	NA	NA	NA	NA	15
ELAVL1	ENSG00000164180	TMEM161B	protein_coding	97	24	373	NA	NA	NA	NA	21
ELAVL1	ENSG00000178764	ZHX2	protein_coding	99	20	373	NA	NA	NA	NA	21
ELAVL1	ENSG00000166167	BTRC	protein_coding	161	22	372	NA	NA	NA	NA	20
ELAVL1	ENSG00000186432	KPNA4	protein_coding	71	30	372	NA	NA	NA	NA	26
ELAVL1	ENSG00000113300	CNOT6	protein_coding	99	30	371	NA	NA	NA	NA	28
ELAVL1	ENSG00000116698	SMG7	protein_coding	105	29	371	NA	NA	NA	NA	29
ELAVL1	ENSG00000118217	ATF6	protein_coding	169	28	371	NA	NA	NA	NA	16
ELAVL1	ENSG00000138018	SELENOI	protein_coding	63	26	371	NA	NA	NA	NA	27
ELAVL1	ENSG00000156642	NPTN	protein_coding	97	24	371	NA	NA	NA	NA	20
ELAVL1	ENSG00000066279	ASPM	protein_coding	78	23	370	NA	NA	NA	NA	29
ELAVL1	ENSG00000126653	NSRP1	protein_coding	79	26	370	NA	NA	NA	-0.343	23
ELAVL1	ENSG00000131323	TRAF3	protein_coding	92	24	370	NA	NA	NA	NA	16
ELAVL1	ENSG00000132570	PCBD2	protein_coding	65	28	370	NA	NA	NA	NA	16
ELAVL1	ENSG00000170776	AKAP13	protein_coding	173	26	370	NA	NA	NA	NA	18
ELAVL1	ENSG00000101557	USP14	protein_coding	74	29	369	NA	NA	NA	NA	29
ELAVL1	ENSG00000115947	ORC4	protein_coding	101	21	369	NA	NA	NA	NA	25
ELAVL1	ENSG00000119787	ATL2	protein_coding	93	31	369	NA	NA	NA	NA	22
ELAVL1	ENSG00000138777	PPA2	protein_coding	101	23	369	NA	NA	NA	NA	16
ELAVL1	ENSG00000286192	AC069288.1	protein_coding	133	28	369	NA	NA	NA	NA	0
ELAVL1	ENSG00000140374	ETFA	protein_coding	105	22	368	NA	NA	NA	0.216	23
ELAVL1	ENSG00000196781	TLE1	protein_coding	114	21	368	NA	NA	NA	NA	16
ELAVL1	ENSG00000104723	TUSC3	protein_coding	167	28	367	NA	NA	NA	NA	18
ELAVL1	ENSG00000126070	AGO3	protein_coding	132	29	367	NA	NA	NA	NA	22
ELAVL1	ENSG00000184445	KNTC1	protein_coding	104	25	367	NA	NA	NA	NA	29
ELAVL1	ENSG00000198604	BAZ1A	protein_coding	107	29	367	NA	NA	NA	NA	24
ELAVL1	ENSG00000112159	MDN1	protein_coding	144	29	366	NA	NA	NA	NA	25
ELAVL1	ENSG00000118058	KMT2A	protein_coding	84	27	366	NA	NA	NA	NA	22
ELAVL1	ENSG00000133030	MPRIP	protein_coding	109	31	366	NA	NA	NA	NA	19
ELAVL1	ENSG00000181450	ZNF678	protein_coding	116	20	366	NA	NA	NA	NA	23
ELAVL1	ENSG00000182903	ZNF721	protein_coding	72	27	366	NA	NA	NA	NA	22
ELAVL1	ENSG00000285920	AC087721.2	protein_coding	85	30	366	NA	NA	NA	NA	0
ELAVL1	ENSG00000054965	FAM168A	protein_coding	133	27	365	NA	NA	NA	NA	19
ELAVL1	ENSG00000102189	EEA1	protein_coding	97	26	365	NA	NA	NA	NA	16
ELAVL1	ENSG00000147649	MTDH	protein_coding	91	28	365	NA	NA	NA	NA	20
ELAVL1	ENSG00000288635	AC106873.8	protein_coding	129	22	365	NA	NA	NA	NA	0
ELAVL1	ENSG00000078674	PCM1	protein_coding	129	27	364	NA	NA	NA	-0.266	19
ELAVL1	ENSG00000100030	MAPK1	protein_coding	121	25	364	NA	NA	NA	NA	19
ELAVL1	ENSG00000111731	C2CD5	protein_coding	94	23	364	NA	NA	NA	NA	25
ELAVL1	ENSG00000124164	VAPB	protein_coding	84	28	364	NA	NA	NA	NA	23
ELAVL1	ENSG00000134444	RELCH	protein_coding	147	19	364	NA	NA	NA	NA	20
ELAVL1	ENSG00000139496	NUP58	protein_coding	62	27	364	NA	NA	NA	NA	27
ELAVL1	ENSG00000198815	FOXJ3	protein_coding	133	26	364	NA	NA	NA	NA	26
ELAVL1	ENSG00000060749	QSER1	protein_coding	96	30	363	NA	NA	NA	NA	29
ELAVL1	ENSG00000133657	ATP13A3	protein_coding	90	27	363	NA	NA	NA	NA	25
ELAVL1	ENSG00000259316	AC087632.2	protein_coding	132	26	363	NA	NA	NA	NA	13
ELAVL1	ENSG00000029363	BCLAF1	protein_coding	45	30	362	NA	NA	NA	NA	28
ELAVL1	ENSG00000137693	YAP1	protein_coding	110	27	362	NA	NA	0.162	NA	17
ELAVL1	ENSG00000276644	DACH1	protein_coding	231	16	362	NA	NA	NA	NA	15
ELAVL1	ENSG00000006831	ADIPOR2	protein_coding	85	26	361	NA	NA	NA	NA	22
ELAVL1	ENSG00000116754	SRSF11	protein_coding	58	31	361	NA	NA	NA	NA	26
ELAVL1	ENSG00000119596	YLPM1	protein_coding	115	23	361	NA	NA	NA	-0.291	25
ELAVL1	ENSG00000133706	LARS1	protein_coding	90	30	360	NA	NA	NA	NA	26
ELAVL1	ENSG00000135749	PCNX2	protein_coding	172	17	360	NA	NA	NA	NA	14
ELAVL1	ENSG00000181827	RFX7	protein_coding	108	26	360	NA	NA	NA	NA	27
ELAVL1	ENSG00000010244	ZNF207	protein_coding	32	30	359	NA	NA	NA	NA	29
ELAVL1	ENSG00000121988	ZRANB3	protein_coding	121	25	359	NA	NA	NA	NA	29
ELAVL1	ENSG00000140718	FTO	protein_coding	201	27	359	NA	NA	NA	-0.418	25
ELAVL1	ENSG00000183576	SETD3	protein_coding	103	27	359	NA	NA	NA	NA	17
ELAVL1	ENSG00000085832	EPS15	protein_coding	108	28	358	NA	NA	NA	NA	18
ELAVL1	ENSG00000196504	PRPF40A	protein_coding	85	26	358	NA	NA	NA	NA	30
ELAVL1	ENSG00000068305	MEF2A	protein_coding	150	22	357	NA	NA	NA	NA	20
ELAVL1	ENSG00000092148	HECTD1	protein_coding	106	25	357	NA	NA	-0.12	NA	23
ELAVL1	ENSG00000114030	KPNA1	protein_coding	104	26	357	NA	NA	NA	NA	24
ELAVL1	ENSG00000118420	UBE3D	protein_coding	145	24	356	NA	NA	NA	NA	20
ELAVL1	ENSG00000130119	GNL3L	protein_coding	69	30	356	NA	NA	NA	NA	23
ELAVL1	ENSG00000157869	RAB28	protein_coding	91	23	356	NA	NA	NA	NA	22
ELAVL1	ENSG00000179832	MROH1	protein_coding	68	21	356	NA	NA	NA	NA	14
ELAVL1	ENSG00000004534	RBM6	protein_coding	118	27	355	NA	NA	NA	NA	13
ELAVL1	ENSG00000089916	GPATCH2L	protein_coding	81	27	355	NA	NA	NA	NA	22
ELAVL1	ENSG00000117859	OSBPL9	protein_coding	168	25	355	NA	NA	0.186	NA	18
ELAVL1	ENSG00000131504	DIAPH1	protein_coding	100	27	355	NA	NA	NA	NA	19
ELAVL1	ENSG00000113391	FAM172A	protein_coding	147	32	354	NA	NA	NA	NA	22
ELAVL1	ENSG00000266086	AC015813.2	protein_coding	22	34	354	NA	NA	NA	0.721	11
ELAVL1	ENSG00000275740	AC091959.1	protein_coding	120	30	354	NA	NA	NA	-0.592	12
ELAVL1	ENSG00000012983	MAP4K5	protein_coding	131	23	353	NA	NA	NA	NA	23
ELAVL1	ENSG00000054654	SYNE2	protein_coding	119	23	353	NA	NA	NA	NA	16
ELAVL1	ENSG00000077097	TOP2B	protein_coding	85	25	353	NA	NA	NA	NA	26
ELAVL1	ENSG00000115966	ATF2	protein_coding	119	30	353	NA	NA	NA	NA	22
ELAVL1	ENSG00000075391	RASAL2	protein_coding	179	25	352	NA	NA	NA	NA	15
ELAVL1	ENSG00000113810	SMC4	protein_coding	43	27	352	NA	NA	-0.26	NA	27
ELAVL1	ENSG00000139218	SCAF11	protein_coding	83	28	352	NA	NA	NA	NA	24
ELAVL1	ENSG00000143398	PIP5K1A	protein_coding	55	24	352	NA	NA	NA	NA	28
ELAVL1	ENSG00000162923	WDR26	protein_coding	75	28	352	NA	NA	NA	NA	24
ELAVL1	ENSG00000206527	HACD2	protein_coding	96	28	352	NA	NA	NA	NA	21
ELAVL1	ENSG00000117139	KDM5B	protein_coding	98	26	351	NA	NA	NA	NA	22
ELAVL1	ENSG00000135341	MAP3K7	protein_coding	78	26	351	NA	NA	NA	NA	23
ELAVL1	ENSG00000172264	MACROD2	protein_coding	207	24	351	NA	NA	NA	NA	13
ELAVL1	ENSG00000124795	DEK	protein_coding	51	30	350	NA	NA	NA	NA	28
ELAVL1	ENSG00000149177	PTPRJ	protein_coding	82	23	350	NA	NA	NA	NA	14
ELAVL1	ENSG00000153914	SREK1	protein_coding	52	33	350	NA	NA	-0.302	NA	24
ELAVL1	ENSG00000177200	CHD9	protein_coding	171	23	350	NA	NA	NA	NA	22
ELAVL1	ENSG00000278139	P3R3URF-PIK3R3	protein_coding	76	21	350	NA	NA	NA	NA	0
ELAVL1	ENSG00000099250	NRP1	protein_coding	92	23	349	NA	NA	NA	NA	15
ELAVL1	ENSG00000163946	TASOR	protein_coding	81	28	349	NA	NA	NA	NA	24
ELAVL1	ENSG00000048405	ZNF800	protein_coding	65	27	348	NA	NA	NA	NA	20
ELAVL1	ENSG00000072736	NFATC3	protein_coding	132	20	348	NA	NA	NA	NA	23
ELAVL1	ENSG00000078369	GNB1	protein_coding	97	26	348	NA	NA	NA	NA	21
ELAVL1	ENSG00000136754	ABI1	protein_coding	114	27	348	NA	NA	NA	NA	16
ELAVL1	ENSG00000197563	PIGN	protein_coding	132	22	348	NA	NA	NA	NA	22
ELAVL1	ENSG00000008083	JARID2	protein_coding	118	25	347	NA	NA	NA	NA	20
ELAVL1	ENSG00000011258	MBTD1	protein_coding	90	28	347	NA	NA	NA	NA	27
ELAVL1	ENSG00000139971	ARMH4	protein_coding	84	27	347	NA	NA	NA	NA	18
ELAVL1	ENSG00000146282	RARS2	protein_coding	98	24	347	NA	NA	NA	NA	20
ELAVL1	ENSG00000150867	PIP4K2A	protein_coding	116	26	347	NA	NA	NA	-0.387	15
ELAVL1	ENSG00000205659	LIN52	protein_coding	97	25	347	NA	NA	NA	NA	26
ELAVL1	ENSG00000270647	TAF15	protein_coding	88	32	347	NA	NA	0.127	NA	29
ELAVL1	ENSG00000048828	FAM120A	protein_coding	110	28	346	NA	NA	NA	-0.149	23
ELAVL1	ENSG00000133318	RTN3	protein_coding	78	29	346	NA	NA	NA	NA	22
ELAVL1	ENSG00000186566	GPATCH8	protein_coding	122	28	346	NA	NA	NA	NA	25
ELAVL1	ENSG00000102763	VWA8	protein_coding	155	22	345	NA	NA	NA	-0.448	22
ELAVL1	ENSG00000114120	SLC25A36	protein_coding	52	30	345	NA	NA	NA	NA	24
ELAVL1	ENSG00000115084	SLC35F5	protein_coding	71	29	345	NA	NA	NA	0.294	20
ELAVL1	ENSG00000156026	MCU	protein_coding	135	24	345	NA	NA	NA	NA	20
ELAVL1	ENSG00000181666	ZNF875	protein_coding	70	25	345	NA	NA	NA	NA	19
ELAVL1	ENSG00000283515	AC020915.4	protein_coding	82	28	345	NA	NA	NA	NA	0
ELAVL1	ENSG00000012048	BRCA1	protein_coding	93	18	344	NA	NA	NA	-0.263	29
ELAVL1	ENSG00000153339	TRAPPC8	protein_coding	135	19	344	NA	NA	NA	NA	22
ELAVL1	ENSG00000131873	CHSY1	protein_coding	84	25	343	NA	NA	NA	NA	21
ELAVL1	ENSG00000133121	STARD13	protein_coding	104	23	343	NA	NA	NA	NA	8
ELAVL1	ENSG00000138443	ABI2	protein_coding	127	26	343	NA	NA	NA	NA	26
ELAVL1	ENSG00000179295	PTPN11	protein_coding	86	32	343	NA	NA	NA	NA	28
ELAVL1	ENSG00000156299	TIAM1	protein_coding	159	29	342	NA	NA	NA	NA	13
ELAVL1	ENSG00000025796	SEC63	protein_coding	107	31	341	NA	NA	NA	NA	23
ELAVL1	ENSG00000064651	SLC12A2	protein_coding	82	29	340	NA	NA	NA	NA	23
ELAVL1	ENSG00000173744	AGFG1	protein_coding	97	27	340	NA	NA	NA	0.255	21
ELAVL1	ENSG00000197548	ATG7	protein_coding	144	23	340	NA	NA	NA	NA	15
ELAVL1	ENSG00000009954	BAZ1B	protein_coding	90	30	339	NA	NA	NA	-0.235	30
ELAVL1	ENSG00000112541	PDE10A	protein_coding	249	17	339	NA	NA	NA	NA	17
ELAVL1	ENSG00000119042	SATB2	protein_coding	138	24	339	NA	NA	NA	NA	23
ELAVL1	ENSG00000137770	CTDSPL2	protein_coding	93	30	339	NA	NA	NA	NA	23
ELAVL1	ENSG00000198160	MIER1	protein_coding	74	26	339	NA	NA	NA	NA	20
ELAVL1	ENSG00000101558	VAPA	protein_coding	61	27	338	NA	NA	NA	NA	19
ELAVL1	ENSG00000163694	RBM47	protein_coding	99	23	338	NA	NA	NA	-0.445	14
ELAVL1	ENSG00000112339	HBS1L	protein_coding	133	26	337	NA	NA	NA	0.285	22
ELAVL1	ENSG00000129351	ILF3	protein_coding	52	31	337	NA	NA	NA	NA	31
ELAVL1	ENSG00000138138	ATAD1	protein_coding	90	28	337	NA	NA	NA	NA	19
ELAVL1	ENSG00000186908	ZDHHC17	protein_coding	78	26	337	NA	NA	NA	0.243	20
ELAVL1	ENSG00000006576	PHTF2	protein_coding	105	24	336	NA	NA	NA	NA	21
ELAVL1	ENSG00000151923	TIAL1	protein_coding	33	31	336	NA	NA	NA	0.223	24
ELAVL1	ENSG00000261609	GAN	protein_coding	47	28	336	NA	NA	NA	NA	20
ELAVL1	ENSG00000148110	MFSD14B	protein_coding	85	24	335	NA	NA	NA	NA	26
ELAVL1	ENSG00000163655	GMPS	protein_coding	82	27	335	NA	NA	NA	NA	28
ELAVL1	ENSG00000177885	GRB2	protein_coding	81	30	335	NA	NA	NA	0.193	22
ELAVL1	ENSG00000080371	RAB21	protein_coding	55	29	334	NA	NA	NA	NA	21
ELAVL1	ENSG00000100393	EP300	protein_coding	100	28	334	NA	NA	NA	NA	24
ELAVL1	ENSG00000128989	ARPP19	protein_coding	31	34	334	NA	NA	NA	NA	21
ELAVL1	ENSG00000121579	NAA50	protein_coding	49	29	333	NA	NA	NA	NA	27
ELAVL1	ENSG00000125779	PANK2	protein_coding	47	30	333	NA	NA	NA	NA	23
ELAVL1	ENSG00000166266	CUL5	protein_coding	104	26	333	NA	NA	NA	NA	21
ELAVL1	ENSG00000133812	SBF2	protein_coding	175	28	332	NA	NA	NA	NA	22
ELAVL1	ENSG00000182628	SKA2	protein_coding	55	23	332	NA	NA	NA	NA	30
ELAVL1	ENSG00000184575	XPOT	protein_coding	63	29	332	NA	NA	NA	NA	27
ELAVL1	ENSG00000186260	MRTFB	protein_coding	110	23	332	NA	NA	NA	NA	22
ELAVL1	ENSG00000227345	PARG	protein_coding	128	24	332	NA	NA	NA	NA	29
ELAVL1	ENSG00000107862	GBF1	protein_coding	117	26	331	NA	NA	NA	0.159	23
ELAVL1	ENSG00000108599	AKAP10	protein_coding	89	30	331	NA	NA	NA	NA	19
ELAVL1	ENSG00000108848	LUC7L3	protein_coding	51	29	331	NA	NA	-0.208	NA	23
ELAVL1	ENSG00000115504	EHBP1	protein_coding	164	25	331	NA	NA	NA	NA	20
ELAVL1	ENSG00000176407	KCMF1	protein_coding	83	25	331	NA	NA	NA	NA	23
ELAVL1	ENSG00000198382	UVRAG	protein_coding	181	25	331	NA	NA	NA	NA	21
ELAVL1	ENSG00000147586	MRPS28	protein_coding	106	22	330	NA	NA	NA	NA	22
ELAVL1	ENSG00000057663	ATG5	protein_coding	134	21	329	NA	NA	NA	NA	20
ELAVL1	ENSG00000068878	PSME4	protein_coding	114	27	329	NA	NA	0.212	NA	24
ELAVL1	ENSG00000109756	RAPGEF2	protein_coding	147	23	329	NA	NA	NA	NA	19
ELAVL1	ENSG00000133961	NUMB	protein_coding	117	20	329	NA	NA	NA	NA	13
ELAVL1	ENSG00000178974	FBXO34	protein_coding	75	25	329	NA	NA	NA	NA	19
ELAVL1	ENSG00000115233	PSMD14	protein_coding	128	20	328	NA	NA	NA	NA	29
ELAVL1	ENSG00000135829	DHX9	protein_coding	68	26	328	NA	NA	NA	-0.431	30
ELAVL1	ENSG00000151240	DIP2C	protein_coding	105	26	328	NA	NA	NA	NA	16
ELAVL1	ENSG00000153187	HNRNPU	protein_coding	22	38	328	NA	NA	NA	NA	31
ELAVL1	ENSG00000169933	FRMPD4	protein_coding	201	14	328	NA	NA	NA	NA	13
ELAVL1	ENSG00000091009	RBM27	protein_coding	97	30	327	NA	NA	NA	NA	28
ELAVL1	ENSG00000144560	VGLL4	protein_coding	94	24	327	NA	NA	NA	NA	26
ELAVL1	ENSG00000169118	CSNK1G1	protein_coding	117	27	327	NA	NA	NA	NA	26
ELAVL1	ENSG00000275052	PPP4R3B	protein_coding	85	28	327	NA	NA	-0.147	-0.184	25
ELAVL1	ENSG00000002822	MAD1L1	protein_coding	121	26	326	NA	NA	NA	NA	14
ELAVL1	ENSG00000004897	CDC27	protein_coding	84	30	326	NA	NA	NA	NA	26
ELAVL1	ENSG00000011405	PIK3C2A	protein_coding	110	23	326	NA	NA	NA	NA	21
ELAVL1	ENSG00000064999	ANKS1A	protein_coding	133	24	326	NA	NA	NA	NA	23
ELAVL1	ENSG00000116560	SFPQ	protein_coding	19	39	326	NA	NA	0.123	NA	30
ELAVL1	ENSG00000169967	MAP3K2	protein_coding	74	26	326	NA	NA	NA	0.355	20
ELAVL1	ENSG00000064419	TNPO3	protein_coding	88	28	325	NA	NA	NA	NA	27
ELAVL1	ENSG00000088179	PTPN4	protein_coding	145	26	325	NA	NA	NA	NA	23
ELAVL1	ENSG00000112062	MAPK14	protein_coding	97	25	325	NA	NA	NA	NA	18
ELAVL1	ENSG00000116117	PARD3B	protein_coding	166	23	325	NA	NA	NA	NA	17
ELAVL1	ENSG00000143569	UBAP2L	protein_coding	62	28	325	NA	NA	NA	NA	30
ELAVL1	ENSG00000158528	PPP1R9A	protein_coding	126	25	325	NA	NA	NA	NA	16
ELAVL1	ENSG00000167635	ZNF146	protein_coding	33	24	325	NA	NA	NA	NA	30
ELAVL1	ENSG00000070366	SMG6	protein_coding	125	22	324	NA	NA	NA	NA	26
ELAVL1	ENSG00000076685	NT5C2	protein_coding	113	24	324	NA	NA	NA	NA	19
ELAVL1	ENSG00000100697	DICER1	protein_coding	75	30	323	NA	NA	NA	NA	24
ELAVL1	ENSG00000137710	RDX	protein_coding	108	35	323	NA	NA	NA	NA	16
ELAVL1	ENSG00000173230	GOLGB1	protein_coding	89	26	323	NA	NA	0.13	NA	19
ELAVL1	ENSG00000175455	CCDC14	protein_coding	67	27	323	NA	NA	NA	NA	26
ELAVL1	ENSG00000177463	NR2C2	protein_coding	88	25	323	NA	NA	NA	NA	22
ELAVL1	ENSG00000273269	AC073283.3	protein_coding	71	32	323	NA	NA	NA	NA	5
ELAVL1	ENSG00000087206	UIMC1	protein_coding	123	24	322	NA	NA	NA	NA	21
ELAVL1	ENSG00000110713	NUP98	protein_coding	134	24	322	NA	NA	NA	NA	30
ELAVL1	ENSG00000139116	KIF21A	protein_coding	108	27	322	NA	NA	NA	NA	22
ELAVL1	ENSG00000107854	TNKS2	protein_coding	75	32	321	NA	NA	NA	NA	19
ELAVL1	ENSG00000113441	LNPEP	protein_coding	68	29	321	NA	NA	NA	NA	15
ELAVL1	ENSG00000116473	RAP1A	protein_coding	107	27	321	NA	NA	NA	NA	17
ELAVL1	ENSG00000141425	RPRD1A	protein_coding	95	26	321	NA	NA	NA	NA	25
ELAVL1	ENSG00000164916	FOXK1	protein_coding	54	30	321	NA	NA	NA	NA	22
ELAVL1	ENSG00000164983	TMEM65	protein_coding	77	31	321	NA	NA	NA	NA	16
ELAVL1	ENSG00000187257	RSBN1L	protein_coding	96	25	321	NA	NA	NA	NA	21
ELAVL1	ENSG00000055208	TAB2	protein_coding	102	28	320	NA	NA	NA	NA	19
ELAVL1	ENSG00000100592	DAAM1	protein_coding	110	26	320	NA	NA	NA	NA	17
ELAVL1	ENSG00000119487	MAPKAP1	protein_coding	165	26	320	NA	NA	NA	-0.392	28
ELAVL1	ENSG00000151461	UPF2	protein_coding	117	27	320	NA	NA	NA	NA	23
ELAVL1	ENSG00000165650	PDZD8	protein_coding	104	30	320	NA	NA	NA	NA	22
ELAVL1	ENSG00000023287	RB1CC1	protein_coding	105	26	319	NA	NA	NA	NA	20
ELAVL1	ENSG00000101413	RPRD1B	protein_coding	85	25	319	NA	NA	NA	NA	26
ELAVL1	ENSG00000139132	FGD4	protein_coding	92	23	319	NA	NA	NA	NA	16
ELAVL1	ENSG00000141449	GREB1L	protein_coding	131	22	319	NA	NA	NA	NA	17
ELAVL1	ENSG00000151893	CACUL1	protein_coding	89	31	319	NA	NA	NA	NA	18
ELAVL1	ENSG00000174437	ATP2A2	protein_coding	77	32	319	NA	NA	NA	0.192	24
ELAVL1	ENSG00000197321	SVIL	protein_coding	100	29	319	NA	NA	0.273	NA	19
ELAVL1	ENSG00000108424	KPNB1	protein_coding	44	32	318	NA	NA	NA	NA	30
ELAVL1	ENSG00000114933	INO80D	protein_coding	61	27	318	NA	NA	NA	NA	24
ELAVL1	ENSG00000138376	BARD1	protein_coding	85	27	318	NA	NA	NA	NA	30
ELAVL1	ENSG00000160584	SIK3	protein_coding	168	21	318	NA	NA	NA	NA	18
ELAVL1	ENSG00000168172	HOOK3	protein_coding	79	29	318	NA	NA	NA	NA	17
ELAVL1	ENSG00000189283	FHIT	protein_coding	205	23	318	NA	NA	NA	NA	12
ELAVL1	ENSG00000054118	THRAP3	protein_coding	80	31	317	NA	NA	NA	NA	27
ELAVL1	ENSG00000069849	ATP1B3	protein_coding	60	27	317	NA	NA	NA	0.26	20
ELAVL1	ENSG00000083168	KAT6A	protein_coding	114	30	317	NA	NA	NA	NA	20
ELAVL1	ENSG00000119509	INVS	protein_coding	131	24	317	NA	NA	NA	NA	20
ELAVL1	ENSG00000145349	CAMK2D	protein_coding	154	25	317	NA	NA	NA	NA	17
ELAVL1	ENSG00000151131	C12orf45	protein_coding	81	26	317	NA	NA	NA	NA	14
ELAVL1	ENSG00000180370	PAK2	protein_coding	47	30	317	NA	NA	NA	NA	28
ELAVL1	ENSG00000071794	HLTF	protein_coding	77	28	316	NA	NA	NA	NA	22
ELAVL1	ENSG00000103342	GSPT1	protein_coding	61	30	316	NA	NA	NA	NA	24
ELAVL1	ENSG00000138190	EXOC6	protein_coding	136	26	316	NA	NA	NA	NA	20
ELAVL1	ENSG00000156170	NDUFAF6	protein_coding	134	21	316	NA	NA	NA	NA	19
ELAVL1	ENSG00000158711	ELK4	protein_coding	37	31	316	NA	NA	NA	0.447	18
ELAVL1	ENSG00000187605	TET3	protein_coding	64	27	316	NA	NA	NA	NA	24
ELAVL1	ENSG00000116747	RO60	protein_coding	34	32	315	NA	NA	NA	NA	24
ELAVL1	ENSG00000117114	ADGRL2	protein_coding	178	15	315	NA	NA	NA	NA	15
ELAVL1	ENSG00000123219	CENPK	protein_coding	58	26	315	NA	NA	NA	NA	28
ELAVL1	ENSG00000147548	NSD3	protein_coding	104	30	315	NA	NA	NA	0.226	26
ELAVL1	ENSG00000152332	UHMK1	protein_coding	28	32	315	NA	NA	NA	NA	17
ELAVL1	ENSG00000221823	PPP3R1	protein_coding	85	31	315	NA	NA	NA	NA	28
ELAVL1	ENSG00000057608	GDI2	protein_coding	53	28	314	NA	NA	NA	NA	22
ELAVL1	ENSG00000134851	TMEM165	protein_coding	68	26	314	NA	NA	NA	NA	18
ELAVL1	ENSG00000162641	AKNAD1	protein_coding	73	23	314	NA	NA	NA	NA	13
ELAVL1	ENSG00000184640	SEPTIN9	protein_coding	81	24	314	NA	NA	NA	NA	19
ELAVL1	ENSG00000185760	KCNQ5	protein_coding	174	13	314	NA	NA	NA	NA	15
ELAVL1	ENSG00000001629	ANKIB1	protein_coding	119	28	313	NA	NA	NA	NA	20
ELAVL1	ENSG00000021645	NRXN3	protein_coding	189	19	313	NA	NA	NA	NA	12
ELAVL1	ENSG00000138758	SEPTIN11	protein_coding	75	30	313	NA	NA	NA	-0.232	21
ELAVL1	ENSG00000151292	CSNK1G3	protein_coding	100	25	313	NA	NA	NA	NA	20
ELAVL1	ENSG00000170248	PDCD6IP	protein_coding	70	24	313	NA	NA	NA	NA	18
ELAVL1	ENSG00000024048	UBR2	protein_coding	118	25	312	NA	NA	NA	0.303	17
ELAVL1	ENSG00000135999	EPC2	protein_coding	114	22	312	NA	NA	NA	0.189	23
ELAVL1	ENSG00000102531	FNDC3A	protein_coding	137	29	311	NA	NA	NA	NA	16
ELAVL1	ENSG00000133026	MYH10	protein_coding	136	25	311	NA	NA	NA	NA	23
ELAVL1	ENSG00000168807	SNTB2	protein_coding	56	26	311	NA	NA	NA	NA	18
ELAVL1	ENSG00000173214	MFSD4B	protein_coding	60	30	311	NA	NA	NA	NA	18
ELAVL1	ENSG00000106052	TAX1BP1	protein_coding	94	24	310	NA	NA	NA	NA	20
ELAVL1	ENSG00000108091	CCDC6	protein_coding	102	28	310	NA	NA	NA	NA	18
ELAVL1	ENSG00000148429	USP6NL	protein_coding	121	23	310	NA	NA	NA	-0.341	26
ELAVL1	ENSG00000173715	C11orf80	protein_coding	80	20	310	NA	NA	NA	NA	11
ELAVL1	ENSG00000265817	FSBP	protein_coding	56	23	310	NA	NA	NA	NA	5
ELAVL1	ENSG00000031003	FAM13B	protein_coding	95	28	309	NA	NA	NA	NA	20
ELAVL1	ENSG00000132842	AP3B1	protein_coding	150	27	309	NA	NA	NA	NA	23
ELAVL1	ENSG00000157741	UBN2	protein_coding	92	27	309	NA	NA	NA	NA	23
ELAVL1	ENSG00000254732	AP001931.1	protein_coding	64	22	309	NA	NA	NA	NA	14
ELAVL1	ENSG00000257103	LSM14A	protein_coding	70	31	309	NA	NA	NA	NA	28
ELAVL1	ENSG00000054523	KIF1B	protein_coding	149	27	308	NA	NA	NA	NA	20
ELAVL1	ENSG00000115091	ACTR3	protein_coding	79	27	308	NA	NA	NA	NA	24
ELAVL1	ENSG00000140525	FANCI	protein_coding	83	28	308	NA	NA	NA	NA	31
ELAVL1	ENSG00000164830	OXR1	protein_coding	94	27	308	NA	NA	NA	NA	17
ELAVL1	ENSG00000169180	XPO6	protein_coding	108	26	308	NA	NA	NA	NA	24
ELAVL1	ENSG00000181163	NPM1	protein_coding	36	29	308	NA	NA	NA	NA	25
ELAVL1	ENSG00000188342	GTF2F2	protein_coding	130	22	308	NA	NA	NA	NA	26
ELAVL1	ENSG00000196935	SRGAP1	protein_coding	121	22	308	NA	NA	NA	NA	21
ELAVL1	ENSG00000102595	UGGT2	protein_coding	134	28	307	NA	NA	NA	NA	17
ELAVL1	ENSG00000135387	CAPRIN1	protein_coding	72	28	307	NA	NA	NA	NA	28
ELAVL1	ENSG00000168743	NPNT	protein_coding	78	20	307	NA	NA	NA	NA	13
ELAVL1	ENSG00000069667	RORA	protein_coding	188	18	306	NA	NA	NA	NA	15
ELAVL1	ENSG00000073614	KDM5A	protein_coding	87	27	306	NA	NA	NA	0.171	24
ELAVL1	ENSG00000142230	SAE1	protein_coding	102	25	306	NA	NA	NA	-0.092	28
ELAVL1	ENSG00000183291	SELENOF	protein_coding	65	25	306	NA	NA	NA	NA	22
ELAVL1	ENSG00000187741	FANCA	protein_coding	69	26	306	NA	NA	NA	0.279	25
ELAVL1	ENSG00000127603	MACF1	protein_coding	147	27	305	NA	NA	NA	NA	17
ELAVL1	ENSG00000128512	DOCK4	protein_coding	191	16	305	NA	NA	NA	NA	10
ELAVL1	ENSG00000128654	MTX2	protein_coding	75	22	305	NA	NA	NA	NA	26
ELAVL1	ENSG00000131626	PPFIA1	protein_coding	75	24	305	NA	NA	NA	NA	23
ELAVL1	ENSG00000138592	USP8	protein_coding	91	24	305	NA	NA	NA	NA	17
ELAVL1	ENSG00000055130	CUL1	protein_coding	113	26	304	NA	NA	NA	NA	26
ELAVL1	ENSG00000071189	SNX13	protein_coding	128	25	304	NA	NA	NA	NA	20
ELAVL1	ENSG00000101745	ANKRD12	protein_coding	100	22	304	NA	NA	NA	NA	17
ELAVL1	ENSG00000162402	USP24	protein_coding	154	20	304	NA	NA	NA	NA	24
ELAVL1	ENSG00000198015	MRPL42	protein_coding	48	30	304	NA	NA	NA	-0.129	28
ELAVL1	ENSG00000114331	ACAP2	protein_coding	106	27	303	NA	NA	NA	NA	19
ELAVL1	ENSG00000139324	TMTC3	protein_coding	60	31	303	NA	NA	NA	NA	23
ELAVL1	ENSG00000143493	INTS7	protein_coding	112	20	303	NA	NA	NA	NA	30
ELAVL1	ENSG00000162601	MYSM1	protein_coding	68	23	303	NA	NA	0.195	0.231	20
ELAVL1	ENSG00000175582	RAB6A	protein_coding	81	32	303	NA	NA	NA	NA	20
ELAVL1	ENSG00000250349	AF241726.1	protein_coding	169	26	303	NA	NA	NA	NA	0
ELAVL1	ENSG00000065526	SPEN	protein_coding	104	26	302	NA	NA	NA	-0.106	23
ELAVL1	ENSG00000105778	AVL9	protein_coding	76	23	302	NA	NA	NA	NA	24
ELAVL1	ENSG00000128573	FOXP2	protein_coding	187	14	302	NA	NA	NA	NA	9
ELAVL1	ENSG00000169251	NMD3	protein_coding	59	24	302	NA	NA	NA	NA	19
ELAVL1	ENSG00000174197	MGA	protein_coding	121	28	302	NA	NA	NA	NA	23
ELAVL1	ENSG00000285901	AC008012.1	protein_coding	56	27	302	NA	NA	NA	NA	0
ELAVL1	ENSG00000101266	CSNK2A1	protein_coding	74	30	301	NA	NA	NA	NA	29
ELAVL1	ENSG00000040341	STAU2	protein_coding	118	24	299	NA	NA	NA	NA	24
ELAVL1	ENSG00000047188	YTHDC2	protein_coding	84	25	299	NA	NA	NA	NA	24
ELAVL1	ENSG00000153207	AHCTF1	protein_coding	100	25	299	NA	NA	NA	NA	28
ELAVL1	ENSG00000167258	CDK12	protein_coding	91	27	299	NA	NA	NA	NA	25
ELAVL1	ENSG00000104388	RAB2A	protein_coding	102	26	298	NA	NA	NA	NA	15
ELAVL1	ENSG00000138160	KIF11	protein_coding	96	26	298	NA	NA	NA	NA	31
ELAVL1	ENSG00000285547	AL133500.1	protein_coding	168	20	298	NA	NA	NA	NA	0
ELAVL1	ENSG00000066933	MYO9A	protein_coding	124	24	297	NA	NA	NA	NA	18
ELAVL1	ENSG00000106299	WASL	protein_coding	75	28	297	NA	NA	NA	NA	16
ELAVL1	ENSG00000124782	RREB1	protein_coding	93	28	297	NA	NA	-0.164	-0.23	20
ELAVL1	ENSG00000147099	HDAC8	protein_coding	167	20	297	NA	NA	NA	NA	25
ELAVL1	ENSG00000198887	SMC5	protein_coding	98	26	297	NA	NA	NA	NA	23
ELAVL1	ENSG00000115239	ASB3	protein_coding	144	25	296	NA	NA	NA	NA	16
ELAVL1	ENSG00000134744	TUT4	protein_coding	144	17	296	NA	NA	NA	NA	25
ELAVL1	ENSG00000136381	IREB2	protein_coding	73	29	296	NA	NA	NA	NA	23
ELAVL1	ENSG00000151458	ANKRD50	protein_coding	56	25	296	NA	NA	NA	NA	22
ELAVL1	ENSG00000123983	ACSL3	protein_coding	85	29	295	NA	NA	NA	NA	18
ELAVL1	ENSG00000135090	TAOK3	protein_coding	103	24	295	NA	NA	NA	NA	15
ELAVL1	ENSG00000120137	PANK3	protein_coding	31	29	294	NA	NA	NA	0.309	23
ELAVL1	ENSG00000147044	CASK	protein_coding	147	27	294	NA	NA	NA	NA	25
ELAVL1	ENSG00000172493	AFF1	protein_coding	116	27	294	NA	NA	NA	NA	21
ELAVL1	ENSG00000176853	FAM91A1	protein_coding	61	22	294	NA	NA	NA	0.186	23
ELAVL1	ENSG00000184787	UBE2G2	protein_coding	48	29	294	NA	NA	NA	NA	21
ELAVL1	ENSG00000197381	ADARB1	protein_coding	104	21	294	NA	NA	NA	NA	11
ELAVL1	ENSG00000213096	ZNF254	protein_coding	82	26	294	NA	NA	NA	NA	24
ELAVL1	ENSG00000100644	HIF1A	protein_coding	64	27	293	NA	NA	NA	NA	19
ELAVL1	ENSG00000143420	ENSA	protein_coding	41	27	293	NA	NA	NA	NA	17
ELAVL1	ENSG00000169519	METTL15	protein_coding	161	19	293	NA	NA	NA	NA	20
ELAVL1	ENSG00000124171	PARD6B	protein_coding	35	24	292	NA	NA	NA	NA	17
ELAVL1	ENSG00000143924	EML4	protein_coding	127	27	292	NA	NA	NA	NA	25
ELAVL1	ENSG00000011295	TTC19	protein_coding	60	25	291	NA	NA	NA	NA	24
ELAVL1	ENSG00000033178	UBA6	protein_coding	111	27	291	NA	NA	NA	NA	25
ELAVL1	ENSG00000107581	EIF3A	protein_coding	62	27	291	NA	NA	NA	NA	25
ELAVL1	ENSG00000112893	MAN2A1	protein_coding	124	28	291	NA	NA	NA	NA	14
ELAVL1	ENSG00000113580	NR3C1	protein_coding	94	29	291	NA	NA	NA	NA	15
ELAVL1	ENSG00000136143	SUCLA2	protein_coding	136	28	291	NA	NA	NA	NA	20
ELAVL1	ENSG00000138668	HNRNPD	protein_coding	31	28	291	NA	NA	NA	NA	29
ELAVL1	ENSG00000144228	SPOPL	protein_coding	67	25	291	NA	NA	NA	0.404	23
ELAVL1	ENSG00000165392	WRN	protein_coding	115	18	291	NA	NA	NA	NA	21
ELAVL1	ENSG00000285953	AC000120.3	protein_coding	84	24	291	NA	NA	2.172	NA	0
ELAVL1	ENSG00000107669	ATE1	protein_coding	113	23	290	NA	NA	NA	NA	21
ELAVL1	ENSG00000113163	CERT1	protein_coding	128	23	290	NA	NA	NA	NA	19
ELAVL1	ENSG00000136527	TRA2B	protein_coding	36	31	290	NA	NA	NA	NA	29
ELAVL1	ENSG00000175198	PCCA	protein_coding	135	22	290	NA	NA	NA	NA	16
ELAVL1	ENSG00000258790	AL121594.1	protein_coding	116	23	290	NA	NA	-0.582	NA	11
ELAVL1	ENSG00000011426	ANLN	protein_coding	78	24	289	NA	NA	NA	NA	29
ELAVL1	ENSG00000118816	CCNI	protein_coding	27	33	289	NA	NA	NA	0.229	19
ELAVL1	ENSG00000124783	SSR1	protein_coding	43	30	289	NA	NA	NA	NA	26
ELAVL1	ENSG00000138600	SPPL2A	protein_coding	56	26	289	NA	NA	NA	NA	20
ELAVL1	ENSG00000257390	AC023055.1	protein_coding	82	23	289	NA	NA	NA	NA	19
ELAVL1	ENSG00000072501	SMC1A	protein_coding	60	28	288	NA	NA	NA	NA	27
ELAVL1	ENSG00000196865	NHLRC2	protein_coding	56	31	288	NA	NA	NA	NA	25
ELAVL1	ENSG00000204130	RUFY2	protein_coding	70	26	288	NA	NA	NA	NA	20
ELAVL1	ENSG00000080815	PSEN1	protein_coding	88	27	287	NA	NA	NA	NA	17
ELAVL1	ENSG00000103657	HERC1	protein_coding	136	25	287	NA	NA	NA	NA	18
ELAVL1	ENSG00000113282	CLINT1	protein_coding	80	30	287	NA	NA	NA	NA	22
ELAVL1	ENSG00000124422	USP22	protein_coding	56	29	287	NA	NA	NA	-0.164	27
ELAVL1	ENSG00000140332	TLE3	protein_coding	56	30	287	NA	NA	NA	NA	12
ELAVL1	ENSG00000157933	SKI	protein_coding	74	32	287	NA	NA	NA	-0.223	20
ELAVL1	ENSG00000159140	SON	protein_coding	49	30	287	NA	NA	NA	NA	21
ELAVL1	ENSG00000178177	LCORL	protein_coding	118	26	287	NA	NA	NA	NA	24
ELAVL1	ENSG00000081019	RSBN1	protein_coding	57	24	286	NA	NA	NA	NA	23
ELAVL1	ENSG00000102786	INTS6	protein_coding	90	24	286	NA	NA	NA	NA	20
ELAVL1	ENSG00000186020	ZNF529	protein_coding	60	24	286	NA	NA	NA	0.394	20
ELAVL1	ENSG00000012660	ELOVL5	protein_coding	80	28	285	NA	NA	NA	NA	22
ELAVL1	ENSG00000066777	ARFGEF1	protein_coding	105	24	285	NA	NA	NA	NA	20
ELAVL1	ENSG00000132155	RAF1	protein_coding	81	22	285	NA	NA	NA	NA	24
ELAVL1	ENSG00000137942	FNBP1L	protein_coding	108	26	285	NA	NA	NA	NA	23
ELAVL1	ENSG00000157110	RBPMS	protein_coding	103	16	285	NA	NA	NA	NA	12
ELAVL1	ENSG00000163683	SMIM14	protein_coding	76	24	285	NA	NA	NA	NA	22
ELAVL1	ENSG00000213064	SFT2D2	protein_coding	24	33	285	NA	NA	NA	NA	23
ELAVL1	ENSG00000101109	STK4	protein_coding	96	30	284	NA	NA	NA	NA	22
ELAVL1	ENSG00000126214	KLC1	protein_coding	81	29	284	NA	NA	NA	NA	14
ELAVL1	ENSG00000155111	CDK19	protein_coding	137	24	284	NA	NA	NA	NA	24
ELAVL1	ENSG00000164548	TRA2A	protein_coding	33	31	284	NA	NA	NA	NA	21
ELAVL1	ENSG00000174579	MSL2	protein_coding	68	23	284	NA	NA	NA	NA	26
ELAVL1	ENSG00000184007	PTP4A2	protein_coding	40	35	284	NA	NA	NA	NA	15
ELAVL1	ENSG00000185480	PARPBP	protein_coding	79	24	284	NA	NA	NA	NA	31
ELAVL1	ENSG00000198431	TXNRD1	protein_coding	80	31	284	NA	NA	NA	NA	21
ELAVL1	ENSG00000073792	IGF2BP2	protein_coding	141	14	283	NA	NA	NA	NA	16
ELAVL1	ENSG00000127922	SEM1	protein_coding	130	22	283	NA	NA	NA	NA	13
ELAVL1	ENSG00000136051	WASHC4	protein_coding	70	23	283	NA	NA	NA	NA	15
ELAVL1	ENSG00000140526	ABHD2	protein_coding	83	24	283	NA	NA	NA	NA	17
ELAVL1	ENSG00000141627	DYM	protein_coding	151	20	283	NA	NA	NA	NA	21
ELAVL1	ENSG00000183495	EP400	protein_coding	85	27	283	NA	NA	NA	NA	26
ELAVL1	ENSG00000187790	FANCM	protein_coding	83	21	283	NA	NA	NA	NA	28
ELAVL1	ENSG00000006125	AP2B1	protein_coding	126	30	282	NA	NA	NA	NA	25
ELAVL1	ENSG00000051382	PIK3CB	protein_coding	94	26	282	NA	NA	NA	NA	19
ELAVL1	ENSG00000100330	MTMR3	protein_coding	109	23	282	NA	NA	NA	NA	16
ELAVL1	ENSG00000133983	COX16	protein_coding	83	25	282	NA	NA	NA	NA	22
ELAVL1	ENSG00000143179	UCK2	protein_coding	75	27	282	NA	NA	NA	-0.139	28
ELAVL1	ENSG00000165219	GAPVD1	protein_coding	95	24	282	NA	NA	NA	0.126	23
ELAVL1	ENSG00000187742	SECISBP2	protein_coding	54	18	282	NA	NA	NA	NA	19
ELAVL1	ENSG00000251201	TMED7-TICAM2	protein_coding	47	31	282	NA	NA	NA	NA	18
ELAVL1	ENSG00000255872	AL138752.2	protein_coding	111	30	282	NA	NA	NA	NA	12
ELAVL1	ENSG00000285827	AP001267.5	protein_coding	72	29	282	NA	NA	NA	NA	0
ELAVL1	ENSG00000069956	MAPK6	protein_coding	66	25	281	NA	NA	NA	NA	20
ELAVL1	ENSG00000081803	CADPS2	protein_coding	129	24	281	NA	NA	NA	NA	10
ELAVL1	ENSG00000112419	PHACTR2	protein_coding	83	28	281	NA	NA	NA	NA	14
ELAVL1	ENSG00000113368	LMNB1	protein_coding	72	28	281	NA	NA	NA	NA	30
ELAVL1	ENSG00000134108	ARL8B	protein_coding	72	27	281	NA	NA	NA	NA	16
ELAVL1	ENSG00000136231	IGF2BP3	protein_coding	125	20	281	NA	NA	NA	-0.114	19
ELAVL1	ENSG00000116127	ALMS1	protein_coding	108	25	280	NA	NA	NA	NA	28
ELAVL1	ENSG00000143748	NVL	protein_coding	118	20	280	NA	NA	NA	-0.196	30
ELAVL1	ENSG00000173692	PSMD1	protein_coding	119	21	280	NA	NA	NA	NA	27
ELAVL1	ENSG00000174010	KLHL15	protein_coding	45	24	280	NA	NA	NA	NA	25
ELAVL1	ENSG00000198740	ZNF652	protein_coding	54	29	280	NA	NA	NA	NA	24
ELAVL1	ENSG00000145715	RASA1	protein_coding	109	22	279	NA	NA	NA	NA	21
ELAVL1	ENSG00000151247	EIF4E	protein_coding	58	29	279	NA	NA	NA	NA	23
ELAVL1	ENSG00000082438	COBLL1	protein_coding	94	21	278	NA	NA	NA	NA	8
ELAVL1	ENSG00000100784	RPS6KA5	protein_coding	123	22	278	NA	NA	NA	NA	17
ELAVL1	ENSG00000116350	SRSF4	protein_coding	48	28	278	NA	NA	NA	NA	29
ELAVL1	ENSG00000128487	SPECC1	protein_coding	93	27	278	NA	NA	NA	NA	14
ELAVL1	ENSG00000134278	SPIRE1	protein_coding	108	22	278	NA	NA	NA	NA	16
ELAVL1	ENSG00000254673	AC110275.1	protein_coding	48	30	278	NA	NA	NA	NA	2
ELAVL1	ENSG00000101191	DIDO1	protein_coding	61	27	277	NA	NA	-0.167	-0.128	24
ELAVL1	ENSG00000130402	ACTN4	protein_coding	74	28	277	NA	NA	NA	NA	16
ELAVL1	ENSG00000136021	SCYL2	protein_coding	82	24	277	NA	NA	NA	NA	27
ELAVL1	ENSG00000140455	USP3	protein_coding	83	27	277	NA	NA	NA	NA	21
ELAVL1	ENSG00000154265	ABCA5	protein_coding	68	21	277	NA	NA	NA	NA	13
ELAVL1	ENSG00000172766	NAA16	protein_coding	74	24	277	NA	NA	NA	NA	23
ELAVL1	ENSG00000172869	DMXL1	protein_coding	124	24	277	NA	NA	NA	NA	18
ELAVL1	ENSG00000173517	PEAK1	protein_coding	145	22	277	NA	NA	NA	NA	16
ELAVL1	ENSG00000182446	NPLOC4	protein_coding	78	28	277	NA	NA	NA	0.187	19
ELAVL1	ENSG00000185900	POMK	protein_coding	29	31	277	NA	NA	NA	NA	21
ELAVL1	ENSG00000203791	EEF1AKMT2	protein_coding	50	26	277	NA	NA	NA	NA	22
ELAVL1	ENSG00000107890	ANKRD26	protein_coding	112	25	276	NA	NA	NA	NA	21
ELAVL1	ENSG00000116731	PRDM2	protein_coding	84	26	276	NA	NA	NA	-0.194	21
ELAVL1	ENSG00000116984	MTR	protein_coding	124	25	276	NA	NA	NA	NA	24
ELAVL1	ENSG00000155903	RASA2	protein_coding	100	21	276	NA	NA	NA	NA	17
ELAVL1	ENSG00000179104	TMTC2	protein_coding	110	26	276	NA	NA	NA	NA	15
ELAVL1	ENSG00000214078	CPNE1	protein_coding	51	29	276	NA	NA	NA	NA	13
ELAVL1	ENSG00000070831	CDC42	protein_coding	61	32	275	NA	NA	0.244	NA	18
ELAVL1	ENSG00000081853	PCDHGA2	protein_coding	65	26	275	NA	NA	NA	NA	13
ELAVL1	ENSG00000089006	SNX5	protein_coding	33	30	275	NA	NA	0.133	NA	25
ELAVL1	ENSG00000118873	RAB3GAP2	protein_coding	138	22	275	NA	NA	NA	0.192	20
ELAVL1	ENSG00000122545	SEPTIN7	protein_coding	96	30	275	NA	NA	NA	-0.159	20
ELAVL1	ENSG00000126261	UBA2	protein_coding	55	28	275	NA	NA	NA	NA	27
ELAVL1	ENSG00000135164	DMTF1	protein_coding	58	21	275	NA	NA	NA	NA	21
ELAVL1	ENSG00000137073	UBAP2	protein_coding	109	21	275	NA	NA	NA	NA	23
ELAVL1	ENSG00000138398	PPIG	protein_coding	70	28	275	NA	NA	NA	NA	26
ELAVL1	ENSG00000141564	RPTOR	protein_coding	154	26	275	NA	NA	NA	NA	25
ELAVL1	ENSG00000164941	INTS8	protein_coding	70	20	275	NA	NA	NA	NA	24
ELAVL1	ENSG00000165476	REEP3	protein_coding	71	27	275	NA	NA	NA	NA	18
ELAVL1	ENSG00000180198	RCC1	protein_coding	36	30	275	NA	NA	NA	NA	25
ELAVL1	ENSG00000198677	TTC37	protein_coding	92	22	275	NA	NA	NA	NA	21
ELAVL1	ENSG00000204956	PCDHGA1	protein_coding	65	26	275	NA	NA	NA	NA	14
ELAVL1	ENSG00000101901	ALG13	protein_coding	95	22	274	NA	NA	NA	NA	16
ELAVL1	ENSG00000115998	C2orf42	protein_coding	65	26	274	NA	NA	NA	NA	21
ELAVL1	ENSG00000120093	HOXB3	protein_coding	72	18	274	NA	NA	NA	NA	17
ELAVL1	ENSG00000175054	ATR	protein_coding	116	24	274	NA	NA	NA	NA	24
ELAVL1	ENSG00000114098	ARMC8	protein_coding	114	27	273	NA	NA	NA	NA	22
ELAVL1	ENSG00000114127	XRN1	protein_coding	110	23	273	NA	NA	NA	NA	16
ELAVL1	ENSG00000118260	CREB1	protein_coding	78	25	273	NA	NA	NA	NA	24
ELAVL1	ENSG00000129521	EGLN3	protein_coding	83	28	273	NA	NA	-0.487	NA	15
ELAVL1	ENSG00000134759	ELP2	protein_coding	65	26	273	NA	NA	NA	NA	22
ELAVL1	ENSG00000150527	MIA2	protein_coding	90	22	273	NA	NA	NA	NA	10
ELAVL1	ENSG00000003989	SLC7A2	protein_coding	60	25	272	NA	NA	-0.171	NA	14
ELAVL1	ENSG00000134909	ARHGAP32	protein_coding	120	19	272	NA	NA	NA	NA	15
ELAVL1	ENSG00000136068	FLNB	protein_coding	92	22	272	NA	NA	NA	NA	11
ELAVL1	ENSG00000138448	ITGAV	protein_coding	57	27	272	NA	NA	0.407	NA	14
ELAVL1	ENSG00000162521	RBBP4	protein_coding	53	29	272	NA	NA	NA	NA	29
ELAVL1	ENSG00000095951	HIVEP1	protein_coding	87	22	271	NA	NA	NA	NA	20
ELAVL1	ENSG00000124208	PEDS1-UBE2V1	protein_coding	58	29	271	NA	NA	NA	NA	12
ELAVL1	ENSG00000176788	BASP1	protein_coding	91	32	271	NA	NA	NA	NA	16
ELAVL1	ENSG00000196776	CD47	protein_coding	46	24	271	NA	NA	NA	NA	17
ELAVL1	ENSG00000095015	MAP3K1	protein_coding	65	25	270	NA	NA	NA	NA	15
ELAVL1	ENSG00000157657	ZNF618	protein_coding	70	26	270	NA	NA	NA	NA	26
ELAVL1	ENSG00000171456	ASXL1	protein_coding	107	27	270	NA	NA	NA	NA	21
ELAVL1	ENSG00000182149	IST1	protein_coding	70	24	270	NA	NA	NA	0.232	21
ELAVL1	ENSG00000186001	LRCH3	protein_coding	105	23	270	NA	NA	NA	NA	23
ELAVL1	ENSG00000282278	AC058822.1	protein_coding	121	26	270	NA	NA	NA	NA	0
ELAVL1	ENSG00000067955	CBFB	protein_coding	62	30	269	NA	NA	NA	NA	26
ELAVL1	ENSG00000109184	DCUN1D4	protein_coding	78	31	269	NA	NA	NA	NA	19
ELAVL1	ENSG00000117335	CD46	protein_coding	55	27	269	NA	NA	NA	0.377	19
ELAVL1	ENSG00000121621	KIF18A	protein_coding	96	19	269	NA	NA	NA	NA	30
ELAVL1	ENSG00000129292	PHF20L1	protein_coding	82	23	269	NA	NA	NA	NA	22
ELAVL1	ENSG00000133103	COG6	protein_coding	94	25	269	NA	NA	NA	NA	24
ELAVL1	ENSG00000138182	KIF20B	protein_coding	88	24	269	NA	NA	NA	NA	29
ELAVL1	ENSG00000141568	FOXK2	protein_coding	82	25	269	NA	NA	NA	NA	30
ELAVL1	ENSG00000196715	VKORC1L1	protein_coding	69	24	269	NA	NA	NA	NA	26
ELAVL1	ENSG00000198836	OPA1	protein_coding	93	25	269	NA	NA	NA	NA	28
ELAVL1	ENSG00000102710	SUPT20H	protein_coding	58	24	268	NA	NA	NA	NA	25
ELAVL1	ENSG00000109133	TMEM33	protein_coding	34	32	268	NA	NA	NA	NA	23
ELAVL1	ENSG00000139865	TTC6	protein_coding	104	20	268	NA	NA	NA	NA	12
ELAVL1	ENSG00000158169	FANCC	protein_coding	80	23	268	NA	NA	NA	NA	30
ELAVL1	ENSG00000158985	CDC42SE2	protein_coding	75	28	268	NA	NA	NA	NA	17
ELAVL1	ENSG00000173588	CEP83	protein_coding	89	24	268	NA	NA	NA	NA	27
ELAVL1	ENSG00000264545	AL359922.1	protein_coding	96	26	268	NA	NA	NA	NA	3
ELAVL1	ENSG00000018510	AGPS	protein_coding	134	15	267	NA	NA	NA	NA	24
ELAVL1	ENSG00000130779	CLIP1	protein_coding	76	26	267	NA	NA	NA	NA	16
ELAVL1	ENSG00000135333	EPHA7	protein_coding	131	12	267	NA	NA	NA	NA	16
ELAVL1	ENSG00000135597	REPS1	protein_coding	106	17	267	NA	NA	NA	-0.481	24
ELAVL1	ENSG00000156958	GALK2	protein_coding	107	25	267	NA	NA	NA	NA	17
ELAVL1	ENSG00000168411	RFWD3	protein_coding	65	26	267	NA	NA	NA	-0.23	30
ELAVL1	ENSG00000075568	TMEM131	protein_coding	109	23	266	NA	NA	NA	NA	25
ELAVL1	ENSG00000112739	PRPF4B	protein_coding	50	27	266	NA	NA	NA	NA	27
ELAVL1	ENSG00000136603	SKIL	protein_coding	46	29	266	NA	NA	NA	NA	15
ELAVL1	ENSG00000138802	SEC24B	protein_coding	99	21	266	NA	NA	NA	NA	20
ELAVL1	ENSG00000153179	RASSF3	protein_coding	57	26	266	NA	NA	NA	NA	19
ELAVL1	ENSG00000153956	CACNA2D1	protein_coding	162	16	266	NA	NA	NA	NA	13
ELAVL1	ENSG00000182944	EWSR1	protein_coding	40	29	266	NA	NA	0.188	NA	27
ELAVL1	ENSG00000213639	PPP1CB	protein_coding	48	33	266	NA	NA	NA	0.215	20
ELAVL1	ENSG00000254245	PCDHGA3	protein_coding	63	26	266	NA	NA	NA	NA	14
ELAVL1	ENSG00000117620	SLC35A3	protein_coding	76	29	265	NA	NA	NA	NA	20
ELAVL1	ENSG00000139697	SBNO1	protein_coding	72	28	265	NA	NA	NA	NA	30
ELAVL1	ENSG00000141979	AC008764.1	protein_coding	73	26	265	NA	NA	NA	NA	4
ELAVL1	ENSG00000151466	SCLT1	protein_coding	101	23	265	NA	NA	NA	-0.274	26
ELAVL1	ENSG00000163781	TOPBP1	protein_coding	80	21	265	NA	NA	NA	-0.147	27
ELAVL1	ENSG00000165322	ARHGAP12	protein_coding	89	23	265	NA	NA	NA	NA	16
ELAVL1	ENSG00000167491	GATAD2A	protein_coding	63	32	265	NA	NA	NA	NA	30
ELAVL1	ENSG00000182150	ERCC6L2	protein_coding	88	25	265	NA	NA	NA	NA	21
ELAVL1	ENSG00000186660	ZFP91	protein_coding	54	29	265	NA	NA	NA	NA	27
ELAVL1	ENSG00000255073	ZFP91-CNTF	protein_coding	54	29	265	NA	NA	NA	NA	14
ELAVL1	ENSG00000259305	ZHX1-C8orf76	protein_coding	63	28	265	NA	NA	NA	NA	11
ELAVL1	ENSG00000137845	ADAM10	protein_coding	89	28	264	NA	NA	NA	NA	20
ELAVL1	ENSG00000145439	CBR4	protein_coding	78	24	264	NA	NA	NA	-0.654	20
ELAVL1	ENSG00000163104	SMARCAD1	protein_coding	89	21	264	NA	NA	NA	-0.268	27
ELAVL1	ENSG00000168385	SEPTIN2	protein_coding	40	29	264	NA	NA	NA	NA	23
ELAVL1	ENSG00000170242	USP47	protein_coding	114	22	264	NA	NA	NA	NA	20
ELAVL1	ENSG00000187239	FNBP1	protein_coding	81	28	264	NA	NA	NA	NA	19
ELAVL1	ENSG00000254221	PCDHGB1	protein_coding	62	26	264	NA	NA	NA	NA	12
ELAVL1	ENSG00000111011	RSRC2	protein_coding	30	27	263	NA	NA	NA	NA	27
ELAVL1	ENSG00000136861	CDK5RAP2	protein_coding	130	21	263	NA	NA	NA	NA	26
ELAVL1	ENSG00000138081	FBXO11	protein_coding	82	24	263	NA	NA	NA	0.162	24
ELAVL1	ENSG00000139644	TMBIM6	protein_coding	28	32	263	NA	NA	NA	NA	17
ELAVL1	ENSG00000145781	COMMD10	protein_coding	94	25	263	NA	NA	NA	NA	21
ELAVL1	ENSG00000166016	ABTB2	protein_coding	76	21	263	NA	NA	NA	NA	16
ELAVL1	ENSG00000198911	SREBF2	protein_coding	54	27	263	NA	NA	NA	NA	20
ELAVL1	ENSG00000205133	TRIQK	protein_coding	77	20	263	NA	NA	NA	NA	18
ELAVL1	ENSG00000090686	USP48	protein_coding	94	23	262	NA	NA	NA	NA	19
ELAVL1	ENSG00000106459	NRF1	protein_coding	102	24	262	NA	NA	NA	NA	29
ELAVL1	ENSG00000107341	UBE2R2	protein_coding	81	28	262	NA	NA	NA	NA	24
ELAVL1	ENSG00000113360	DROSHA	protein_coding	124	25	262	NA	NA	NA	NA	28
ELAVL1	ENSG00000130741	EIF2S3	protein_coding	25	35	262	NA	NA	NA	0.14	24
ELAVL1	ENSG00000139793	MBNL2	protein_coding	125	29	262	NA	NA	NA	0.271	17
ELAVL1	ENSG00000151304	SRFBP1	protein_coding	88	28	262	NA	NA	NA	NA	24
ELAVL1	ENSG00000168036	CTNNB1	protein_coding	60	32	262	NA	NA	0.21	0.303	17
ELAVL1	ENSG00000171940	ZNF217	protein_coding	48	21	262	NA	NA	NA	NA	20
ELAVL1	ENSG00000185736	ADARB2	protein_coding	198	9	262	NA	NA	NA	NA	15
ELAVL1	ENSG00000205339	IPO7	protein_coding	70	26	262	NA	NA	NA	NA	24
ELAVL1	ENSG00000056586	RC3H2	protein_coding	58	31	261	NA	NA	NA	NA	21
ELAVL1	ENSG00000134255	CEPT1	protein_coding	60	28	261	NA	NA	NA	0.207	19
ELAVL1	ENSG00000173611	SCAI	protein_coding	115	23	261	NA	NA	NA	NA	27
ELAVL1	ENSG00000281593	AC006978.2	protein_coding	48	24	261	NA	NA	NA	NA	7
ELAVL1	ENSG00000118454	ANKRD13C	protein_coding	104	24	260	NA	NA	NA	NA	22
ELAVL1	ENSG00000177889	UBE2N	protein_coding	50	32	260	NA	NA	NA	NA	29
ELAVL1	ENSG00000205323	SARNP	protein_coding	80	21	260	NA	NA	NA	NA	17
ELAVL1	ENSG00000010818	HIVEP2	protein_coding	108	23	259	NA	NA	-0.332	NA	15
ELAVL1	ENSG00000070018	LRP6	protein_coding	97	25	259	NA	NA	NA	NA	21
ELAVL1	ENSG00000114354	TFG	protein_coding	55	23	259	NA	NA	NA	0.177	24
ELAVL1	ENSG00000136379	ABHD17C	protein_coding	55	25	259	NA	NA	NA	NA	16
ELAVL1	ENSG00000179051	RCC2	protein_coding	50	34	259	NA	NA	NA	NA	31
ELAVL1	ENSG00000105968	H2AZ2	protein_coding	20	31	258	NA	NA	NA	NA	28
ELAVL1	ENSG00000115163	CENPA	protein_coding	27	30	258	NA	NA	-0.631	NA	30
ELAVL1	ENSG00000133818	RRAS2	protein_coding	90	21	258	NA	NA	NA	NA	18
ELAVL1	ENSG00000152409	JMY	protein_coding	70	27	258	NA	NA	NA	NA	20
ELAVL1	ENSG00000156876	SASS6	protein_coding	63	23	258	NA	NA	NA	NA	29
ELAVL1	ENSG00000248710	AC079594.1	protein_coding	130	23	258	NA	NA	NA	NA	6
ELAVL1	ENSG00000014824	SLC30A9	protein_coding	85	26	257	NA	NA	NA	NA	23
ELAVL1	ENSG00000093144	ECHDC1	protein_coding	60	26	257	NA	NA	NA	NA	15
ELAVL1	ENSG00000152484	USP12	protein_coding	82	23	257	NA	NA	NA	NA	13
ELAVL1	ENSG00000164506	STXBP5	protein_coding	101	24	257	NA	NA	NA	NA	18
ELAVL1	ENSG00000166503	HDGFL3	protein_coding	83	27	257	NA	NA	NA	NA	25
ELAVL1	ENSG00000077157	PPP1R12B	protein_coding	133	22	256	NA	NA	NA	NA	18
ELAVL1	ENSG00000086015	MAST2	protein_coding	122	17	256	NA	NA	NA	NA	17
ELAVL1	ENSG00000173041	ZNF680	protein_coding	47	23	256	NA	NA	NA	NA	18
ELAVL1	ENSG00000176225	RTTN	protein_coding	110	16	256	NA	NA	NA	NA	26
ELAVL1	ENSG00000178882	RFLNA	protein_coding	68	30	256	NA	NA	NA	NA	10
ELAVL1	ENSG00000267318	AC005702.1	protein_coding	39	20	256	NA	NA	NA	NA	1
ELAVL1	ENSG00000015676	NUDCD3	protein_coding	96	26	255	NA	NA	NA	NA	17
ELAVL1	ENSG00000058063	ATP11B	protein_coding	82	26	255	NA	NA	NA	NA	21
ELAVL1	ENSG00000140350	ANP32A	protein_coding	53	30	255	NA	NA	NA	NA	30
ELAVL1	ENSG00000144366	GULP1	protein_coding	104	24	255	NA	NA	NA	NA	18
ELAVL1	ENSG00000148481	MINDY3	protein_coding	100	19	255	NA	NA	NA	NA	19
ELAVL1	ENSG00000156273	BACH1	protein_coding	124	20	255	NA	NA	NA	0.392	20
ELAVL1	ENSG00000172795	DCP2	protein_coding	47	30	255	NA	NA	NA	NA	24
ELAVL1	ENSG00000182463	TSHZ2	protein_coding	165	16	255	NA	NA	NA	NA	14
ELAVL1	ENSG00000184226	PCDH9	protein_coding	120	24	255	NA	NA	NA	NA	15
ELAVL1	ENSG00000196247	ZNF107	protein_coding	63	23	255	NA	NA	NA	-0.308	26
ELAVL1	ENSG00000264522	OTUD7B	protein_coding	54	24	255	NA	NA	NA	NA	18
ELAVL1	ENSG00000272897	AL109827.1	protein_coding	45	29	255	NA	NA	NA	NA	1
ELAVL1	ENSG00000085719	CPNE3	protein_coding	48	24	254	NA	NA	NA	NA	21
ELAVL1	ENSG00000131023	LATS1	protein_coding	58	26	254	NA	NA	NA	NA	23
ELAVL1	ENSG00000138674	SEC31A	protein_coding	78	26	254	NA	NA	0.217	0.355	23
ELAVL1	ENSG00000143033	MTF2	protein_coding	72	24	254	NA	NA	NA	NA	29
ELAVL1	ENSG00000173848	NET1	protein_coding	64	24	254	NA	NA	-0.305	NA	18
ELAVL1	ENSG00000196510	ANAPC7	protein_coding	42	26	254	NA	NA	NA	NA	28
ELAVL1	ENSG00000025800	KPNA6	protein_coding	56	31	253	NA	NA	NA	0.244	25
ELAVL1	ENSG00000111142	METAP2	protein_coding	52	27	253	NA	NA	NA	NA	27
ELAVL1	ENSG00000132964	CDK8	protein_coding	87	23	253	NA	NA	NA	NA	28
ELAVL1	ENSG00000198718	TOGARAM1	protein_coding	80	20	253	NA	NA	NA	NA	19
ELAVL1	ENSG00000263001	GTF2I	protein_coding	71	21	253	NA	NA	NA	NA	25
ELAVL1	ENSG00000107771	CCSER2	protein_coding	84	26	252	NA	NA	NA	NA	14
ELAVL1	ENSG00000122966	CIT	protein_coding	99	25	252	NA	NA	NA	NA	29
ELAVL1	ENSG00000132424	PNISR	protein_coding	39	26	252	NA	NA	NA	NA	19
ELAVL1	ENSG00000137478	FCHSD2	protein_coding	92	27	252	NA	NA	NA	NA	17
ELAVL1	ENSG00000152952	PLOD2	protein_coding	54	26	252	NA	NA	NA	NA	13
ELAVL1	ENSG00000272772	AC104109.3	protein_coding	68	31	252	NA	NA	NA	NA	14
ELAVL1	ENSG00000285733	AL031315.1	protein_coding	91	24	252	NA	NA	NA	NA	0
ELAVL1	ENSG00000047410	TPR	protein_coding	92	18	251	NA	NA	NA	NA	25
ELAVL1	ENSG00000126883	NUP214	protein_coding	95	22	251	NA	NA	NA	NA	26
ELAVL1	ENSG00000184465	WDR27	protein_coding	90	24	251	NA	NA	NA	NA	15
ELAVL1	ENSG00000198799	LRIG2	protein_coding	77	22	251	NA	NA	NA	0.339	22
ELAVL1	ENSG00000219545	UMAD1	protein_coding	119	23	251	NA	NA	NA	NA	16
ELAVL1	ENSG00000043093	DCUN1D1	protein_coding	45	32	250	NA	NA	NA	NA	23
ELAVL1	ENSG00000100888	CHD8	protein_coding	69	23	250	NA	NA	NA	NA	23
ELAVL1	ENSG00000128595	CALU	protein_coding	38	30	250	NA	NA	NA	NA	20
ELAVL1	ENSG00000139687	RB1	protein_coding	107	25	250	NA	NA	NA	NA	23
ELAVL1	ENSG00000148516	ZEB1	protein_coding	139	15	250	NA	NA	NA	NA	18
ELAVL1	ENSG00000163960	UBXN7	protein_coding	65	32	250	NA	NA	-0.204	NA	26
ELAVL1	ENSG00000029725	RABEP1	protein_coding	89	24	249	NA	NA	NA	NA	22
ELAVL1	ENSG00000102753	KPNA3	protein_coding	79	26	249	NA	NA	NA	NA	22
ELAVL1	ENSG00000104331	BPNT2	protein_coding	33	28	249	NA	NA	NA	NA	25
ELAVL1	ENSG00000124214	STAU1	protein_coding	69	29	249	NA	NA	NA	NA	27
ELAVL1	ENSG00000131263	RLIM	protein_coding	37	33	249	NA	NA	NA	NA	24
ELAVL1	ENSG00000156011	PSD3	protein_coding	149	24	249	NA	NA	NA	NA	19
ELAVL1	ENSG00000169375	SIN3A	protein_coding	73	25	249	NA	NA	NA	NA	27
ELAVL1	ENSG00000170266	GLB1	protein_coding	31	29	249	NA	NA	NA	NA	19
ELAVL1	ENSG00000075624	ACTB	protein_coding	5	39	248	NA	NA	0.223	NA	16
ELAVL1	ENSG00000100485	SOS2	protein_coding	103	20	248	NA	NA	NA	NA	19
ELAVL1	ENSG00000115364	MRPL19	protein_coding	36	34	248	NA	NA	NA	NA	28
ELAVL1	ENSG00000134308	YWHAQ	protein_coding	49	27	248	NA	NA	NA	NA	25
ELAVL1	ENSG00000141646	SMAD4	protein_coding	66	27	248	NA	NA	NA	0.208	20
ELAVL1	ENSG00000147459	DOCK5	protein_coding	78	29	248	NA	NA	NA	NA	12
ELAVL1	ENSG00000151779	NBAS	protein_coding	123	24	248	NA	NA	NA	NA	20
ELAVL1	ENSG00000153815	CMIP	protein_coding	83	26	248	NA	NA	NA	-0.14	15
ELAVL1	ENSG00000196405	EVL	protein_coding	86	24	248	NA	NA	NA	NA	9
ELAVL1	ENSG00000198742	SMURF1	protein_coding	73	26	248	NA	NA	NA	NA	15
ELAVL1	ENSG00000102974	CTCF	protein_coding	63	26	247	NA	NA	NA	-0.174	30
ELAVL1	ENSG00000121749	TBC1D15	protein_coding	93	21	247	NA	NA	NA	0.42	19
ELAVL1	ENSG00000135018	UBQLN1	protein_coding	54	29	247	NA	NA	NA	NA	28
ELAVL1	ENSG00000136813	ECPAS	protein_coding	89	25	247	NA	NA	0.128	NA	19
ELAVL1	ENSG00000152102	FAM168B	protein_coding	48	29	247	NA	NA	NA	NA	27
ELAVL1	ENSG00000164300	SERINC5	protein_coding	66	19	247	NA	NA	NA	NA	24
ELAVL1	ENSG00000185728	YTHDF3	protein_coding	53	29	247	NA	NA	NA	NA	19
ELAVL1	ENSG00000258644	SYNJ2BP-COX16	protein_coding	80	22	247	NA	NA	NA	NA	18
ELAVL1	ENSG00000055044	NOP58	protein_coding	48	24	246	NA	NA	NA	-0.597	31
ELAVL1	ENSG00000101040	ZMYND8	protein_coding	91	25	246	NA	NA	NA	NA	22
ELAVL1	ENSG00000105738	SIPA1L3	protein_coding	74	26	246	NA	NA	NA	NA	24
ELAVL1	ENSG00000105993	DNAJB6	protein_coding	70	27	246	NA	NA	NA	NA	20
ELAVL1	ENSG00000110321	EIF4G2	protein_coding	13	30	246	NA	NA	NA	NA	27
ELAVL1	ENSG00000136758	YME1L1	protein_coding	60	25	246	NA	NA	0.14	NA	25
ELAVL1	ENSG00000138604	GLCE	protein_coding	82	26	246	NA	NA	NA	NA	14
ELAVL1	ENSG00000142864	SERBP1	protein_coding	28	31	246	NA	NA	NA	NA	27
ELAVL1	ENSG00000167978	SRRM2	protein_coding	24	33	246	NA	NA	NA	NA	22
ELAVL1	ENSG00000234444	ZNF736	protein_coding	49	22	246	NA	NA	NA	NA	20
ELAVL1	ENSG00000243156	MICAL3	protein_coding	81	23	246	NA	NA	NA	NA	17
ELAVL1	ENSG00000051825	MPHOSPH9	protein_coding	87	22	245	NA	NA	NA	NA	27
ELAVL1	ENSG00000085491	SLC25A24	protein_coding	59	26	245	NA	NA	NA	NA	19
ELAVL1	ENSG00000085733	CTTN	protein_coding	37	23	245	NA	NA	NA	0.136	12
ELAVL1	ENSG00000113658	SMAD5	protein_coding	49	29	245	NA	NA	NA	NA	25
ELAVL1	ENSG00000117505	DR1	protein_coding	29	33	245	NA	NA	NA	NA	22
ELAVL1	ENSG00000109180	OCIAD1	protein_coding	40	28	244	NA	NA	NA	NA	21
ELAVL1	ENSG00000122257	RBBP6	protein_coding	40	26	244	NA	NA	NA	NA	26
ELAVL1	ENSG00000127947	PTPN12	protein_coding	86	24	244	NA	NA	NA	NA	21
ELAVL1	ENSG00000128641	MYO1B	protein_coding	82	25	244	NA	NA	NA	NA	19
ELAVL1	ENSG00000158467	AHCYL2	protein_coding	120	27	244	NA	NA	NA	NA	17
ELAVL1	ENSG00000183066	WBP2NL	protein_coding	27	12	244	NA	NA	NA	NA	6
ELAVL1	ENSG00000111110	PPM1H	protein_coding	77	27	243	NA	NA	NA	NA	21
ELAVL1	ENSG00000114686	MRPL3	protein_coding	53	18	243	NA	NA	NA	NA	28
ELAVL1	ENSG00000115970	THADA	protein_coding	116	18	243	NA	NA	NA	NA	23
ELAVL1	ENSG00000116001	TIA1	protein_coding	45	26	243	NA	NA	NA	NA	26
ELAVL1	ENSG00000121940	CLCC1	protein_coding	42	23	243	NA	NA	NA	NA	20
ELAVL1	ENSG00000152242	C18orf25	protein_coding	73	31	243	NA	NA	NA	0.509	23
ELAVL1	ENSG00000163634	THOC7	protein_coding	46	18	243	NA	NA	NA	NA	18
ELAVL1	ENSG00000164535	DAGLB	protein_coding	41	31	243	NA	NA	NA	NA	12
ELAVL1	ENSG00000166025	AMOTL1	protein_coding	84	27	243	NA	NA	NA	-0.258	20
ELAVL1	ENSG00000183826	BTBD9	protein_coding	144	19	243	NA	NA	NA	NA	18
ELAVL1	ENSG00000197961	ZNF121	protein_coding	24	33	243	NA	NA	NA	NA	31
ELAVL1	ENSG00000054793	ATP9A	protein_coding	75	28	242	NA	NA	NA	NA	17
ELAVL1	ENSG00000067533	RRP15	protein_coding	54	27	242	NA	NA	NA	NA	29
ELAVL1	ENSG00000079332	SAR1A	protein_coding	26	31	242	NA	NA	NA	0.261	15
ELAVL1	ENSG00000108423	TUBD1	protein_coding	43	22	242	NA	NA	NA	NA	28
ELAVL1	ENSG00000110958	PTGES3	protein_coding	33	31	242	NA	NA	NA	NA	29
ELAVL1	ENSG00000113194	FAF2	protein_coding	61	27	242	NA	NA	NA	NA	25
ELAVL1	ENSG00000114770	ABCC5	protein_coding	51	24	242	NA	NA	NA	NA	17
ELAVL1	ENSG00000116830	TTF2	protein_coding	45	20	242	NA	NA	NA	-0.314	29
ELAVL1	ENSG00000136636	KCTD3	protein_coding	76	20	242	NA	NA	NA	NA	22
ELAVL1	ENSG00000169760	NLGN1	protein_coding	163	14	242	NA	NA	NA	NA	12
ELAVL1	ENSG00000001631	KRIT1	protein_coding	61	24	241	NA	NA	NA	NA	22
ELAVL1	ENSG00000087460	GNAS	protein_coding	37	24	241	NA	NA	NA	NA	23
ELAVL1	ENSG00000114978	MOB1A	protein_coding	21	30	241	NA	NA	NA	0.209	28
ELAVL1	ENSG00000127527	EPS15L1	protein_coding	68	18	241	NA	NA	NA	NA	28
ELAVL1	ENSG00000164151	ICE1	protein_coding	87	25	241	NA	NA	NA	NA	26
ELAVL1	ENSG00000100811	YY1	protein_coding	56	30	240	NA	NA	NA	NA	30
ELAVL1	ENSG00000103404	USP31	protein_coding	65	26	240	NA	NA	NA	NA	19
ELAVL1	ENSG00000106829	TLE4	protein_coding	150	18	240	NA	NA	NA	NA	18
ELAVL1	ENSG00000118412	CASP8AP2	protein_coding	59	25	240	NA	NA	NA	NA	27
ELAVL1	ENSG00000148950	IMMP1L	protein_coding	86	18	240	NA	NA	NA	NA	21
ELAVL1	ENSG00000156304	SCAF4	protein_coding	84	23	240	NA	NA	NA	NA	31
ELAVL1	ENSG00000176208	ATAD5	protein_coding	67	22	240	NA	NA	NA	0.224	29
ELAVL1	ENSG00000215301	DDX3X	protein_coding	33	27	240	NA	NA	NA	NA	21
ELAVL1	ENSG00000064042	LIMCH1	protein_coding	142	23	239	NA	NA	NA	NA	16
ELAVL1	ENSG00000078043	PIAS2	protein_coding	85	27	239	NA	NA	NA	NA	22
ELAVL1	ENSG00000100813	ACIN1	protein_coding	32	31	239	NA	NA	-0.105	NA	26
ELAVL1	ENSG00000153560	UBP1	protein_coding	59	25	239	NA	NA	NA	NA	26
ELAVL1	ENSG00000155744	FAM126B	protein_coding	90	22	239	NA	NA	NA	NA	17
ELAVL1	ENSG00000166439	RNF169	protein_coding	57	31	239	NA	NA	NA	NA	21
ELAVL1	ENSG00000177479	ARIH2	protein_coding	64	27	239	NA	NA	NA	NA	23
ELAVL1	ENSG00000185716	MOSMO	protein_coding	73	29	239	NA	NA	NA	NA	19
ELAVL1	ENSG00000105887	MTPN	protein_coding	53	31	238	NA	NA	NA	NA	18
ELAVL1	ENSG00000108306	FBXL20	protein_coding	92	29	238	NA	NA	NA	NA	23
ELAVL1	ENSG00000160216	AGPAT3	protein_coding	60	30	238	NA	NA	NA	NA	21
ELAVL1	ENSG00000203995	ZYG11A	protein_coding	55	28	238	NA	NA	NA	NA	14
ELAVL1	ENSG00000039319	ZFYVE16	protein_coding	61	25	237	NA	NA	NA	NA	17
ELAVL1	ENSG00000070214	SLC44A1	protein_coding	78	25	237	NA	NA	NA	NA	17
ELAVL1	ENSG00000082258	CCNT2	protein_coding	62	25	237	NA	NA	NA	NA	21
ELAVL1	ENSG00000107758	PPP3CB	protein_coding	71	25	237	NA	NA	NA	NA	17
ELAVL1	ENSG00000135269	TES	protein_coding	59	32	237	NA	NA	NA	NA	11
ELAVL1	ENSG00000148154	UGCG	protein_coding	54	27	237	NA	NA	NA	NA	18
ELAVL1	ENSG00000159592	GPBP1L1	protein_coding	55	30	237	NA	NA	NA	NA	20
ELAVL1	ENSG00000204138	PHACTR4	protein_coding	86	25	237	NA	NA	NA	NA	28
ELAVL1	ENSG00000259024	TVP23C-CDRT4	protein_coding	86	26	237	NA	NA	NA	NA	20
ELAVL1	ENSG00000270106	TSNAX-DISC1	protein_coding	82	26	237	NA	NA	NA	NA	7
ELAVL1	ENSG00000005801	ZNF195	protein_coding	33	29	236	NA	NA	NA	NA	24
ELAVL1	ENSG00000089123	TASP1	protein_coding	113	19	236	NA	NA	NA	NA	20
ELAVL1	ENSG00000108953	YWHAE	protein_coding	45	28	236	NA	NA	NA	NA	28
ELAVL1	ENSG00000150893	FREM2	protein_coding	68	22	236	NA	NA	NA	NA	17
ELAVL1	ENSG00000164031	DNAJB14	protein_coding	60	27	236	NA	NA	NA	NA	19
ELAVL1	ENSG00000197912	SPG7	protein_coding	48	25	236	NA	NA	NA	0.2	14
ELAVL1	ENSG00000213047	DENND1B	protein_coding	104	20	236	NA	NA	NA	NA	11
ELAVL1	ENSG00000106105	GARS1	protein_coding	60	21	235	NA	NA	NA	-0.412	23
ELAVL1	ENSG00000106615	RHEB	protein_coding	69	20	235	NA	NA	NA	NA	21
ELAVL1	ENSG00000117868	ESYT2	protein_coding	71	26	235	NA	NA	NA	NA	14
ELAVL1	ENSG00000122483	CCDC18	protein_coding	94	23	235	NA	NA	NA	-0.232	28
ELAVL1	ENSG00000128833	MYO5C	protein_coding	60	21	235	NA	NA	NA	NA	22
ELAVL1	ENSG00000131508	UBE2D2	protein_coding	77	25	235	NA	NA	NA	NA	25
ELAVL1	ENSG00000133703	KRAS	protein_coding	49	29	235	NA	NA	NA	NA	23
ELAVL1	ENSG00000134480	CCNH	protein_coding	105	17	235	NA	NA	NA	-0.299	18
ELAVL1	ENSG00000145675	PIK3R1	protein_coding	55	23	235	NA	NA	NA	-0.395	16
ELAVL1	ENSG00000147162	OGT	protein_coding	48	26	235	NA	NA	-0.227	NA	15
ELAVL1	ENSG00000152683	SLC30A6	protein_coding	62	27	235	NA	NA	NA	NA	27
ELAVL1	ENSG00000177853	ZNF518A	protein_coding	70	23	235	NA	NA	NA	NA	21
ELAVL1	ENSG00000053254	FOXN3	protein_coding	86	30	234	NA	NA	NA	NA	14
ELAVL1	ENSG00000023516	AKAP11	protein_coding	49	24	233	NA	NA	NA	NA	18
ELAVL1	ENSG00000135541	AHI1	protein_coding	115	24	233	NA	NA	NA	NA	20
ELAVL1	ENSG00000165304	MELK	protein_coding	91	28	233	NA	NA	NA	NA	30
ELAVL1	ENSG00000169756	LIMS1	protein_coding	80	26	233	NA	NA	NA	NA	17
ELAVL1	ENSG00000187118	CMC1	protein_coding	73	21	233	NA	NA	NA	NA	18
ELAVL1	ENSG00000196628	TCF4	protein_coding	117	17	233	NA	NA	NA	NA	14
ELAVL1	ENSG00000066739	ATG2B	protein_coding	76	22	232	NA	NA	NA	NA	21
ELAVL1	ENSG00000135365	PHF21A	protein_coding	96	29	232	NA	NA	NA	NA	25
ELAVL1	ENSG00000185591	SP1	protein_coding	27	32	232	NA	NA	NA	NA	22
ELAVL1	ENSG00000197170	PSMD12	protein_coding	34	29	232	NA	NA	0.2	NA	30
ELAVL1	ENSG00000262576	PCDHGA4	protein_coding	59	26	232	NA	NA	NA	NA	14
ELAVL1	ENSG00000074201	CLNS1A	protein_coding	63	26	231	NA	NA	NA	NA	24
ELAVL1	ENSG00000104093	DMXL2	protein_coding	76	20	231	NA	NA	NA	NA	15
ELAVL1	ENSG00000163806	SPDYA	protein_coding	49	33	231	NA	NA	NA	NA	19
ELAVL1	ENSG00000169057	MECP2	protein_coding	67	26	231	NA	NA	NA	NA	18
ELAVL1	ENSG00000188529	SRSF10	protein_coding	14	26	231	NA	NA	NA	NA	29
ELAVL1	ENSG00000288645	AC084756.2	protein_coding	49	19	231	NA	NA	NA	NA	0
ELAVL1	ENSG00000065135	GNAI3	protein_coding	62	28	230	NA	NA	0.157	NA	22
ELAVL1	ENSG00000100578	KIAA0586	protein_coding	71	20	230	NA	NA	NA	-0.375	25
ELAVL1	ENSG00000145730	PAM	protein_coding	108	23	230	NA	NA	0.48	NA	15
ELAVL1	ENSG00000147421	HMBOX1	protein_coding	132	24	230	NA	NA	NA	NA	15
ELAVL1	ENSG00000149084	HSD17B12	protein_coding	104	20	230	NA	NA	0.224	NA	21
ELAVL1	ENSG00000166263	STXBP4	protein_coding	130	21	230	NA	NA	NA	NA	23
ELAVL1	ENSG00000166326	TRIM44	protein_coding	72	27	230	NA	NA	NA	NA	20
ELAVL1	ENSG00000172380	GNG12	protein_coding	61	30	230	NA	NA	NA	NA	18
ELAVL1	ENSG00000177119	ANO6	protein_coding	90	27	230	NA	NA	NA	NA	15
ELAVL1	ENSG00000104064	GABPB1	protein_coding	59	24	229	NA	NA	NA	0.205	29
ELAVL1	ENSG00000112186	CAP2	protein_coding	87	19	229	NA	NA	NA	NA	18
ELAVL1	ENSG00000112245	PTP4A1	protein_coding	15	32	229	NA	NA	0.147	NA	20
ELAVL1	ENSG00000134215	VAV3	protein_coding	91	18	229	NA	NA	NA	NA	11
ELAVL1	ENSG00000145390	USP53	protein_coding	73	23	229	NA	NA	NA	NA	14
ELAVL1	ENSG00000146592	CREB5	protein_coding	134	17	229	NA	NA	NA	NA	13
ELAVL1	ENSG00000148842	CNNM2	protein_coding	88	24	229	NA	NA	NA	NA	19
ELAVL1	ENSG00000165669	FAM204A	protein_coding	60	27	229	NA	NA	NA	NA	24
ELAVL1	ENSG00000267561	AC093155.3	protein_coding	82	25	229	NA	NA	NA	NA	8
ELAVL1	ENSG00000288640	AC005192.1	protein_coding	54	28	229	NA	NA	NA	NA	0
ELAVL1	ENSG00000078142	PIK3C3	protein_coding	113	15	228	NA	NA	NA	NA	19
ELAVL1	ENSG00000088538	DOCK3	protein_coding	143	18	228	NA	NA	NA	NA	13
ELAVL1	ENSG00000095002	MSH2	protein_coding	93	26	228	NA	NA	NA	NA	30
ELAVL1	ENSG00000150907	FOXO1	protein_coding	93	25	228	NA	NA	NA	NA	13
ELAVL1	ENSG00000163006	CCDC138	protein_coding	91	20	228	NA	NA	NA	NA	30
ELAVL1	ENSG00000170027	YWHAG	protein_coding	23	30	228	NA	NA	NA	NA	29
ELAVL1	ENSG00000017260	ATP2C1	protein_coding	89	25	227	NA	NA	NA	NA	26
ELAVL1	ENSG00000108239	TBC1D12	protein_coding	108	21	227	NA	NA	NA	NA	20
ELAVL1	ENSG00000157181	ODR4	protein_coding	56	23	227	NA	NA	NA	-0.323	18
ELAVL1	ENSG00000163320	CGGBP1	protein_coding	56	26	227	NA	NA	NA	NA	18
ELAVL1	ENSG00000167232	ZNF91	protein_coding	51	24	227	NA	NA	NA	NA	22
ELAVL1	ENSG00000168769	TET2	protein_coding	98	21	227	NA	NA	NA	NA	21
ELAVL1	ENSG00000253910	PCDHGB2	protein_coding	58	26	227	NA	NA	NA	NA	16
ELAVL1	ENSG00000006715	VPS41	protein_coding	122	24	226	NA	NA	NA	-0.288	16
ELAVL1	ENSG00000090054	SPTLC1	protein_coding	81	25	226	NA	NA	NA	NA	24
ELAVL1	ENSG00000120265	PCMT1	protein_coding	73	21	226	NA	NA	NA	NA	21
ELAVL1	ENSG00000130939	UBE4B	protein_coding	91	26	226	NA	NA	NA	-0.346	22
ELAVL1	ENSG00000159086	PAXBP1	protein_coding	43	26	226	NA	NA	NA	0.177	26
ELAVL1	ENSG00000164828	SUN1	protein_coding	49	22	226	NA	NA	NA	NA	23
ELAVL1	ENSG00000169047	IRS1	protein_coding	66	20	226	NA	NA	NA	NA	15
ELAVL1	ENSG00000196505	GDAP2	protein_coding	75	23	226	NA	NA	NA	NA	23
ELAVL1	ENSG00000198380	GFPT1	protein_coding	73	28	226	NA	NA	NA	NA	20
ELAVL1	ENSG00000286221	AC009070.1	protein_coding	66	23	226	NA	NA	NA	NA	0
ELAVL1	ENSG00000058804	NDC1	protein_coding	78	26	225	NA	NA	NA	NA	29
ELAVL1	ENSG00000113048	MRPS27	protein_coding	80	31	225	NA	NA	0.221	NA	25
ELAVL1	ENSG00000114126	TFDP2	protein_coding	130	21	225	NA	NA	NA	NA	25
ELAVL1	ENSG00000118564	FBXL5	protein_coding	76	22	225	NA	NA	NA	NA	18
ELAVL1	ENSG00000135040	NAA35	protein_coding	73	23	225	NA	NA	NA	NA	27
ELAVL1	ENSG00000165105	RASEF	protein_coding	51	25	225	NA	NA	NA	NA	15
ELAVL1	ENSG00000168813	ZNF507	protein_coding	49	28	225	NA	NA	NA	NA	27
ELAVL1	ENSG00000285976	AL135905.2	protein_coding	13	32	225	NA	NA	0.145	NA	0
ELAVL1	ENSG00000032219	ARID4A	protein_coding	74	25	224	NA	NA	NA	NA	19
ELAVL1	ENSG00000035687	ADSS2	protein_coding	44	29	224	NA	NA	NA	NA	28
ELAVL1	ENSG00000049323	LTBP1	protein_coding	80	23	224	NA	NA	NA	NA	14
ELAVL1	ENSG00000064313	TAF2	protein_coding	82	23	224	NA	NA	NA	NA	26
ELAVL1	ENSG00000083097	DOP1A	protein_coding	82	16	224	NA	NA	NA	NA	18
ELAVL1	ENSG00000105426	PTPRS	protein_coding	41	30	224	NA	NA	NA	NA	22
ELAVL1	ENSG00000116489	CAPZA1	protein_coding	53	25	224	NA	NA	NA	NA	23
ELAVL1	ENSG00000159216	RUNX1	protein_coding	62	26	224	NA	NA	NA	NA	16
ELAVL1	ENSG00000182158	CREB3L2	protein_coding	83	28	224	NA	NA	NA	-0.175	15
ELAVL1	ENSG00000184014	DENND5A	protein_coding	105	27	224	NA	NA	NA	NA	24
ELAVL1	ENSG00000099246	RAB18	protein_coding	46	27	223	NA	NA	NA	0.265	15
ELAVL1	ENSG00000115677	HDLBP	protein_coding	78	27	223	NA	NA	NA	0.123	16
ELAVL1	ENSG00000124243	BCAS4	protein_coding	35	18	223	NA	NA	NA	NA	13
ELAVL1	ENSG00000137074	APTX	protein_coding	73	24	223	NA	NA	NA	NA	23
ELAVL1	ENSG00000145362	ANK2	protein_coding	138	15	223	NA	NA	NA	NA	14
ELAVL1	ENSG00000145982	FARS2	protein_coding	130	23	223	NA	NA	NA	NA	18
ELAVL1	ENSG00000154727	GABPA	protein_coding	47	28	223	NA	NA	NA	NA	24
ELAVL1	ENSG00000170653	ATF7	protein_coding	65	25	223	NA	NA	NA	NA	25
ELAVL1	ENSG00000183530	PRR14L	protein_coding	57	29	223	NA	NA	NA	NA	24
ELAVL1	ENSG00000189308	LIN54	protein_coding	92	26	223	NA	NA	NA	NA	25
ELAVL1	ENSG00000267281	ATF7-NPFF	protein_coding	65	25	223	NA	NA	NA	NA	11
ELAVL1	ENSG00000284512	AC092718.7	protein_coding	34	21	223	NA	NA	NA	NA	0
ELAVL1	ENSG00000285943	AC112128.1	protein_coding	71	21	223	NA	NA	NA	NA	0
ELAVL1	ENSG00000087502	ERGIC2	protein_coding	46	29	222	NA	NA	NA	NA	19
ELAVL1	ENSG00000109920	FNBP4	protein_coding	58	25	222	NA	NA	0.149	0.38	22
ELAVL1	ENSG00000116044	NFE2L2	protein_coding	72	25	222	NA	NA	NA	NA	21
ELAVL1	ENSG00000117625	RCOR3	protein_coding	66	24	222	NA	NA	NA	NA	22
ELAVL1	ENSG00000122484	RPAP2	protein_coding	89	19	222	NA	NA	NA	NA	25
ELAVL1	ENSG00000132485	ZRANB2	protein_coding	21	31	222	NA	NA	NA	NA	22
ELAVL1	ENSG00000151746	BICD1	protein_coding	95	27	222	NA	NA	NA	NA	25
ELAVL1	ENSG00000165494	PCF11	protein_coding	42	27	222	NA	NA	NA	NA	20
ELAVL1	ENSG00000171444	MCC	protein_coding	111	22	222	NA	NA	NA	NA	13
ELAVL1	ENSG00000176105	YES1	protein_coding	61	29	222	NA	NA	NA	0.157	23
ELAVL1	ENSG00000179454	KLHL28	protein_coding	45	23	222	NA	NA	NA	NA	22
ELAVL1	ENSG00000187772	LIN28B	protein_coding	97	12	222	NA	NA	NA	NA	12
ELAVL1	ENSG00000253485	PCDHGA5	protein_coding	56	26	222	NA	NA	NA	NA	13
ELAVL1	ENSG00000011275	RNF216	protein_coding	93	20	221	NA	NA	NA	NA	25
ELAVL1	ENSG00000080298	RFX3	protein_coding	87	23	221	NA	NA	NA	NA	21
ELAVL1	ENSG00000109436	TBC1D9	protein_coding	75	22	221	NA	NA	NA	NA	15
ELAVL1	ENSG00000117697	NSL1	protein_coding	73	23	221	NA	NA	NA	NA	25
ELAVL1	ENSG00000142856	ITGB3BP	protein_coding	87	14	221	NA	NA	NA	NA	25
ELAVL1	ENSG00000149554	CHEK1	protein_coding	54	24	221	NA	NA	NA	NA	23
ELAVL1	ENSG00000160218	TRAPPC10	protein_coding	68	25	221	NA	NA	NA	NA	20
ELAVL1	ENSG00000187240	DYNC2H1	protein_coding	148	15	221	NA	NA	NA	-1.509	16
ELAVL1	ENSG00000084234	APLP2	protein_coding	69	32	220	NA	NA	NA	NA	13
ELAVL1	ENSG00000116406	EDEM3	protein_coding	56	27	220	NA	NA	NA	NA	21
ELAVL1	ENSG00000117174	ZNHIT6	protein_coding	73	26	220	NA	NA	NA	NA	27
ELAVL1	ENSG00000117724	CENPF	protein_coding	80	22	220	NA	NA	-0.315	-0.332	31
ELAVL1	ENSG00000122779	TRIM24	protein_coding	92	21	220	NA	NA	NA	NA	27
ELAVL1	ENSG00000135069	PSAT1	protein_coding	44	16	220	NA	NA	NA	NA	21
ELAVL1	ENSG00000136643	RPS6KC1	protein_coding	117	23	220	NA	NA	NA	NA	22
ELAVL1	ENSG00000138346	DNA2	protein_coding	68	20	220	NA	NA	NA	NA	29
ELAVL1	ENSG00000149346	SLX4IP	protein_coding	93	21	220	NA	NA	NA	NA	24
ELAVL1	ENSG00000064393	HIPK2	protein_coding	69	24	219	NA	NA	NA	-0.223	17
ELAVL1	ENSG00000108587	GOSR1	protein_coding	57	27	219	NA	NA	NA	NA	28
ELAVL1	ENSG00000115761	NOL10	protein_coding	97	17	219	NA	NA	NA	NA	28
ELAVL1	ENSG00000121644	DESI2	protein_coding	67	23	219	NA	NA	NA	NA	28
ELAVL1	ENSG00000128607	KLHDC10	protein_coding	64	27	219	NA	NA	NA	NA	27
ELAVL1	ENSG00000143549	TPM3	protein_coding	35	30	219	NA	NA	NA	NA	26
ELAVL1	ENSG00000164754	RAD21	protein_coding	44	27	219	NA	NA	NA	NA	29
ELAVL1	ENSG00000168175	MAPK1IP1L	protein_coding	26	30	219	NA	NA	NA	NA	27
ELAVL1	ENSG00000175322	ZNF519	protein_coding	57	23	219	NA	NA	NA	NA	28
ELAVL1	ENSG00000178105	DDX10	protein_coding	140	20	219	NA	NA	NA	NA	26
ELAVL1	ENSG00000104824	HNRNPL	protein_coding	23	34	218	NA	NA	NA	NA	31
ELAVL1	ENSG00000130227	XPO7	protein_coding	81	27	218	NA	NA	NA	NA	25
ELAVL1	ENSG00000144320	LNPK	protein_coding	54	27	218	NA	NA	NA	NA	21
ELAVL1	ENSG00000173065	FAM222B	protein_coding	66	21	218	NA	NA	NA	NA	22
ELAVL1	ENSG00000198252	STYX	protein_coding	49	26	218	NA	NA	NA	NA	16
ELAVL1	ENSG00000205531	NAP1L4	protein_coding	66	27	218	NA	NA	NA	NA	28
ELAVL1	ENSG00000015153	YAF2	protein_coding	58	24	217	NA	NA	NA	NA	24
ELAVL1	ENSG00000090615	GOLGA3	protein_coding	50	27	217	NA	NA	NA	0.636	23
ELAVL1	ENSG00000101019	UQCC1	protein_coding	89	19	217	NA	NA	NA	NA	21
ELAVL1	ENSG00000107164	FUBP3	protein_coding	57	29	217	NA	NA	NA	NA	30
ELAVL1	ENSG00000110435	PDHX	protein_coding	84	23	217	NA	NA	NA	NA	26
ELAVL1	ENSG00000134294	SLC38A2	protein_coding	14	29	217	NA	NA	NA	NA	18
ELAVL1	ENSG00000137692	DCUN1D5	protein_coding	64	22	217	NA	NA	NA	NA	21
ELAVL1	ENSG00000145555	MYO10	protein_coding	95	24	217	NA	NA	NA	NA	13
ELAVL1	ENSG00000158966	CACHD1	protein_coding	129	13	217	NA	NA	NA	NA	16
ELAVL1	ENSG00000162104	ADCY9	protein_coding	72	23	217	NA	NA	NA	NA	13
ELAVL1	ENSG00000169946	ZFPM2	protein_coding	154	15	217	NA	NA	NA	-0.72	15
ELAVL1	ENSG00000170606	HSPA4	protein_coding	67	24	217	NA	NA	NA	NA	25
ELAVL1	ENSG00000179195	ZNF664	protein_coding	41	30	217	NA	NA	NA	NA	27
ELAVL1	ENSG00000205302	SNX2	protein_coding	71	20	217	NA	NA	NA	0.193	18
ELAVL1	ENSG00000029364	SLC39A9	protein_coding	51	28	216	NA	NA	NA	NA	22
ELAVL1	ENSG00000064933	PMS1	protein_coding	78	22	216	NA	NA	NA	NA	29
ELAVL1	ENSG00000101003	GINS1	protein_coding	44	33	216	NA	NA	NA	NA	31
ELAVL1	ENSG00000101773	RBBP8	protein_coding	97	17	216	NA	NA	NA	NA	27
ELAVL1	ENSG00000115306	SPTBN1	protein_coding	80	27	216	NA	NA	0.157	NA	19
ELAVL1	ENSG00000164494	PDSS2	protein_coding	117	23	216	NA	NA	NA	NA	21
ELAVL1	ENSG00000168710	AHCYL1	protein_coding	47	29	216	NA	NA	NA	NA	18
ELAVL1	ENSG00000169139	UBE2V2	protein_coding	57	27	216	NA	NA	NA	NA	27
ELAVL1	ENSG00000172667	ZMAT3	protein_coding	45	24	216	NA	NA	NA	-0.369	16
ELAVL1	ENSG00000262209	PCDHGB3	protein_coding	53	26	216	NA	NA	NA	NA	16
ELAVL1	ENSG00000079819	EPB41L2	protein_coding	110	29	215	NA	NA	NA	NA	16
ELAVL1	ENSG00000092531	SNAP23	protein_coding	41	26	215	NA	NA	NA	NA	18
ELAVL1	ENSG00000115183	TANC1	protein_coding	100	23	215	NA	NA	0.658	NA	19
ELAVL1	ENSG00000116095	PLEKHA3	protein_coding	32	25	215	NA	NA	NA	NA	24
ELAVL1	ENSG00000129636	ITFG1	protein_coding	96	22	215	NA	NA	NA	NA	19
ELAVL1	ENSG00000131711	MAP1B	protein_coding	53	17	215	NA	NA	NA	NA	18
ELAVL1	ENSG00000133226	SRRM1	protein_coding	44	33	215	NA	NA	NA	0.601	24
ELAVL1	ENSG00000134717	BTF3L4	protein_coding	35	30	215	NA	NA	NA	NA	26
ELAVL1	ENSG00000135932	CAB39	protein_coding	65	24	215	NA	NA	NA	NA	18
ELAVL1	ENSG00000143933	CALM2	protein_coding	26	30	215	NA	NA	NA	NA	21
ELAVL1	ENSG00000148730	EIF4EBP2	protein_coding	24	29	215	NA	NA	NA	NA	15
ELAVL1	ENSG00000158161	EYA3	protein_coding	115	25	215	NA	NA	NA	NA	28
ELAVL1	ENSG00000164182	NDUFAF2	protein_coding	116	22	215	NA	NA	NA	NA	10
ELAVL1	ENSG00000174953	DHX36	protein_coding	67	23	215	NA	NA	NA	NA	26
ELAVL1	ENSG00000179399	GPC5	protein_coding	178	15	215	NA	NA	NA	NA	13
ELAVL1	ENSG00000185046	ANKS1B	protein_coding	100	30	215	NA	NA	NA	NA	16
ELAVL1	ENSG00000258653	AC005520.1	protein_coding	65	22	215	NA	NA	NA	NA	11
ELAVL1	ENSG00000265491	RNF115	protein_coding	71	18	215	NA	NA	NA	NA	22
ELAVL1	ENSG00000285713	AC098588.2	protein_coding	125	22	215	NA	NA	NA	NA	0
ELAVL1	ENSG00000023318	ERP44	protein_coding	84	25	214	NA	NA	NA	NA	16
ELAVL1	ENSG00000114423	CBLB	protein_coding	87	22	214	NA	NA	NA	NA	16
ELAVL1	ENSG00000134352	IL6ST	protein_coding	42	26	214	NA	NA	NA	NA	16
ELAVL1	ENSG00000138069	RAB1A	protein_coding	62	26	214	NA	NA	0.164	NA	18
ELAVL1	ENSG00000144455	SUMF1	protein_coding	102	23	214	NA	NA	NA	NA	13
ELAVL1	ENSG00000151694	ADAM17	protein_coding	66	25	214	NA	NA	NA	NA	24
ELAVL1	ENSG00000165389	SPTSSA	protein_coding	46	26	214	NA	NA	NA	NA	14
ELAVL1	ENSG00000166471	TMEM41B	protein_coding	32	27	214	NA	NA	NA	0.578	18
ELAVL1	ENSG00000196705	ZNF431	protein_coding	65	26	214	NA	NA	NA	NA	26
ELAVL1	ENSG00000198898	CAPZA2	protein_coding	63	32	214	NA	NA	NA	NA	17
ELAVL1	ENSG00000198964	SGMS1	protein_coding	116	23	214	NA	NA	-0.457	NA	15
ELAVL1	ENSG00000005700	IBTK	protein_coding	68	25	213	NA	NA	NA	NA	20
ELAVL1	ENSG00000108671	PSMD11	protein_coding	44	31	213	NA	NA	NA	NA	29
ELAVL1	ENSG00000115524	SF3B1	protein_coding	54	29	213	NA	NA	NA	NA	25
ELAVL1	ENSG00000133704	IPO8	protein_coding	71	29	213	NA	NA	NA	NA	23
ELAVL1	ENSG00000136240	KDELR2	protein_coding	25	31	213	NA	NA	NA	0.38	16
ELAVL1	ENSG00000163507	CIP2A	protein_coding	54	26	213	NA	NA	NA	NA	29
ELAVL1	ENSG00000272822	AC073610.1	protein_coding	37	28	213	NA	NA	NA	NA	11
ELAVL1	ENSG00000096746	HNRNPH3	protein_coding	12	30	212	NA	NA	NA	NA	29
ELAVL1	ENSG00000101966	XIAP	protein_coding	48	27	212	NA	NA	NA	NA	20
ELAVL1	ENSG00000114520	SNX4	protein_coding	64	20	212	NA	NA	NA	NA	22
ELAVL1	ENSG00000115808	STRN	protein_coding	84	26	212	NA	NA	NA	NA	23
ELAVL1	ENSG00000129128	SPCS3	protein_coding	13	33	212	NA	NA	NA	0.188	19
ELAVL1	ENSG00000135720	DYNC1LI2	protein_coding	28	31	212	NA	NA	0.134	NA	20
ELAVL1	ENSG00000150672	DLG2	protein_coding	132	24	212	NA	NA	NA	NA	14
ELAVL1	ENSG00000158019	BABAM2	protein_coding	138	20	212	NA	NA	NA	NA	14
ELAVL1	ENSG00000158092	NCK1	protein_coding	60	23	212	NA	NA	NA	NA	20
ELAVL1	ENSG00000185246	PRPF39	protein_coding	40	27	212	NA	NA	NA	-0.293	22
ELAVL1	ENSG00000260914	AC026464.4	protein_coding	16	26	212	NA	NA	NA	NA	14
ELAVL1	ENSG00000006451	RALA	protein_coding	74	22	211	NA	NA	NA	NA	23
ELAVL1	ENSG00000034677	RNF19A	protein_coding	54	24	211	NA	NA	NA	0.345	18
ELAVL1	ENSG00000071054	MAP4K4	protein_coding	75	26	211	NA	NA	NA	-0.195	19
ELAVL1	ENSG00000099942	CRKL	protein_coding	29	29	211	NA	NA	-0.229	NA	29
ELAVL1	ENSG00000100084	HIRA	protein_coding	92	22	211	NA	NA	NA	NA	24
ELAVL1	ENSG00000105926	MPP6	protein_coding	93	23	211	NA	NA	NA	NA	19
ELAVL1	ENSG00000112941	TENT4A	protein_coding	44	29	211	NA	NA	NA	NA	24
ELAVL1	ENSG00000113387	SUB1	protein_coding	36	31	211	NA	NA	0.25	NA	22
ELAVL1	ENSG00000119402	FBXW2	protein_coding	39	26	211	NA	NA	NA	NA	26
ELAVL1	ENSG00000124209	RAB22A	protein_coding	38	24	211	NA	NA	NA	NA	22
ELAVL1	ENSG00000132716	DCAF8	protein_coding	46	25	211	NA	NA	NA	0.109	13
ELAVL1	ENSG00000152818	UTRN	protein_coding	111	26	211	NA	NA	NA	-0.764	14
ELAVL1	ENSG00000164466	SFXN1	protein_coding	52	28	211	NA	NA	NA	0.21	25
ELAVL1	ENSG00000165934	CPSF2	protein_coding	52	27	211	NA	NA	NA	NA	25
ELAVL1	ENSG00000081913	PHLPP1	protein_coding	106	23	210	NA	NA	NA	NA	22
ELAVL1	ENSG00000082269	FAM135A	protein_coding	112	15	210	NA	NA	NA	NA	20
ELAVL1	ENSG00000086598	TMED2	protein_coding	12	34	210	NA	NA	0.147	NA	23
ELAVL1	ENSG00000104177	MYEF2	protein_coding	40	28	210	NA	NA	NA	NA	21
ELAVL1	ENSG00000108946	PRKAR1A	protein_coding	35	32	210	NA	NA	NA	NA	20
ELAVL1	ENSG00000112308	C6orf62	protein_coding	18	32	210	NA	NA	NA	NA	19
ELAVL1	ENSG00000113648	MACROH2A1	protein_coding	66	29	210	NA	NA	NA	-0.199	25
ELAVL1	ENSG00000117528	ABCD3	protein_coding	81	29	210	NA	NA	NA	NA	20
ELAVL1	ENSG00000134250	NOTCH2	protein_coding	58	26	210	NA	NA	NA	NA	18
ELAVL1	ENSG00000134882	UBAC2	protein_coding	84	28	210	NA	NA	NA	NA	17
ELAVL1	ENSG00000145216	FIP1L1	protein_coding	81	20	210	NA	NA	NA	NA	26
ELAVL1	ENSG00000160352	ZNF714	protein_coding	52	24	210	NA	NA	NA	NA	25
ELAVL1	ENSG00000163399	ATP1A1	protein_coding	43	21	210	NA	NA	0.17	NA	10
ELAVL1	ENSG00000163428	LRRC58	protein_coding	28	27	210	NA	NA	NA	NA	28
ELAVL1	ENSG00000166224	SGPL1	protein_coding	54	29	210	NA	NA	NA	NA	19
ELAVL1	ENSG00000166949	SMAD3	protein_coding	62	23	210	NA	NA	NA	NA	18
ELAVL1	ENSG00000253731	PCDHGA6	protein_coding	52	26	210	NA	NA	NA	NA	11
ELAVL1	ENSG00000018408	WWTR1	protein_coding	73	30	209	NA	NA	NA	NA	14
ELAVL1	ENSG00000111581	NUP107	protein_coding	66	22	209	NA	NA	NA	NA	29
ELAVL1	ENSG00000164144	ARFIP1	protein_coding	78	25	209	NA	NA	NA	NA	24
ELAVL1	ENSG00000166348	USP54	protein_coding	98	24	209	NA	NA	NA	NA	18
ELAVL1	ENSG00000258555	SPECC1L-ADORA2A	protein_coding	89	23	209	NA	NA	NA	NA	12
ELAVL1	ENSG00000272305	AC096887.1	protein_coding	88	25	209	NA	NA	NA	NA	10
ELAVL1	ENSG00000285053	TBCE	protein_coding	97	24	209	NA	NA	NA	NA	0
ELAVL1	ENSG00000020922	MRE11	protein_coding	67	28	208	NA	NA	NA	NA	26
ELAVL1	ENSG00000103365	GGA2	protein_coding	59	23	208	NA	NA	NA	NA	22
ELAVL1	ENSG00000121274	TENT4B	protein_coding	77	25	208	NA	NA	NA	NA	19
ELAVL1	ENSG00000135913	USP37	protein_coding	93	24	208	NA	NA	NA	NA	23
ELAVL1	ENSG00000139842	CUL4A	protein_coding	65	28	208	NA	NA	NA	NA	28
ELAVL1	ENSG00000141446	ESCO1	protein_coding	61	20	208	NA	NA	NA	NA	27
ELAVL1	ENSG00000143476	DTL	protein_coding	82	22	208	NA	NA	NA	NA	31
ELAVL1	ENSG00000143641	GALNT2	protein_coding	114	25	208	NA	NA	NA	-0.246	19
ELAVL1	ENSG00000144645	OSBPL10	protein_coding	76	26	208	NA	NA	NA	NA	14
ELAVL1	ENSG00000153015	CWC27	protein_coding	123	17	208	NA	NA	NA	-0.18	26
ELAVL1	ENSG00000161800	RACGAP1	protein_coding	60	24	208	NA	NA	NA	NA	29
ELAVL1	ENSG00000003436	TFPI	protein_coding	36	24	207	NA	NA	0.201	NA	15
ELAVL1	ENSG00000059728	MXD1	protein_coding	44	24	207	NA	NA	NA	0.329	18
ELAVL1	ENSG00000067141	NEO1	protein_coding	99	25	207	NA	NA	NA	NA	16
ELAVL1	ENSG00000068796	KIF2A	protein_coding	87	24	207	NA	NA	NA	NA	23
ELAVL1	ENSG00000071626	DAZAP1	protein_coding	37	33	207	NA	NA	NA	-0.366	28
ELAVL1	ENSG00000103018	CYB5B	protein_coding	53	29	207	NA	NA	NA	NA	23
ELAVL1	ENSG00000107290	SETX	protein_coding	81	25	207	NA	NA	NA	NA	19
ELAVL1	ENSG00000111707	SUDS3	protein_coding	42	30	207	NA	NA	NA	-0.209	31
ELAVL1	ENSG00000113013	HSPA9	protein_coding	24	29	207	NA	NA	NA	NA	22
ELAVL1	ENSG00000120063	GNA13	protein_coding	38	26	207	NA	NA	NA	0.218	20
ELAVL1	ENSG00000120616	EPC1	protein_coding	85	18	207	NA	NA	NA	NA	21
ELAVL1	ENSG00000143815	LBR	protein_coding	29	30	207	NA	NA	NA	NA	28
ELAVL1	ENSG00000157450	RNF111	protein_coding	99	21	207	NA	NA	NA	NA	21
ELAVL1	ENSG00000163939	PBRM1	protein_coding	73	25	207	NA	NA	NA	NA	24
ELAVL1	ENSG00000168092	PAFAH1B2	protein_coding	23	32	207	NA	NA	NA	NA	22
ELAVL1	ENSG00000171848	RRM2	protein_coding	63	29	207	NA	NA	NA	NA	27
ELAVL1	ENSG00000198554	WDHD1	protein_coding	85	26	207	NA	NA	NA	NA	29
ELAVL1	ENSG00000237515	SHISA9	protein_coding	72	18	207	NA	NA	NA	NA	12
ELAVL1	ENSG00000070367	EXOC5	protein_coding	57	25	206	NA	NA	NA	NA	21
ELAVL1	ENSG00000078699	CBFA2T2	protein_coding	90	23	206	NA	NA	NA	NA	24
ELAVL1	ENSG00000093167	LRRFIP2	protein_coding	98	25	206	NA	NA	NA	NA	16
ELAVL1	ENSG00000099194	SCD	protein_coding	15	32	206	NA	NA	NA	0.234	20
ELAVL1	ENSG00000118242	MREG	protein_coding	62	16	206	NA	NA	NA	NA	16
ELAVL1	ENSG00000123684	LPGAT1	protein_coding	75	25	206	NA	NA	NA	NA	17
ELAVL1	ENSG00000129315	CCNT1	protein_coding	32	29	206	NA	NA	-0.396	-0.133	26
ELAVL1	ENSG00000134982	APC	protein_coding	109	20	206	NA	NA	NA	NA	23
ELAVL1	ENSG00000134987	WDR36	protein_coding	54	30	206	NA	NA	NA	NA	25
ELAVL1	ENSG00000138071	ACTR2	protein_coding	43	29	206	NA	NA	0.137	NA	23
ELAVL1	ENSG00000138778	CENPE	protein_coding	83	21	206	NA	NA	NA	NA	30
ELAVL1	ENSG00000167766	ZNF83	protein_coding	49	24	206	NA	NA	NA	NA	9
ELAVL1	ENSG00000072274	TFRC	protein_coding	44	29	205	NA	NA	NA	NA	22
ELAVL1	ENSG00000103257	SLC7A5	protein_coding	41	29	205	NA	NA	0.176	NA	22
ELAVL1	ENSG00000104231	ZFAND1	protein_coding	37	31	205	NA	NA	NA	NA	23
ELAVL1	ENSG00000104320	NBN	protein_coding	48	28	205	NA	NA	NA	NA	23
ELAVL1	ENSG00000160299	PCNT	protein_coding	68	23	205	NA	NA	NA	-0.219	29
ELAVL1	ENSG00000163558	PRKCI	protein_coding	63	23	205	NA	NA	NA	NA	23
ELAVL1	ENSG00000164930	FZD6	protein_coding	39	23	205	NA	NA	NA	NA	19
ELAVL1	ENSG00000168575	SLC20A2	protein_coding	63	26	205	NA	NA	NA	NA	6
ELAVL1	ENSG00000188352	FOCAD	protein_coding	121	24	205	NA	NA	NA	NA	21
ELAVL1	ENSG00000196591	HDAC2	protein_coding	56	32	205	NA	NA	NA	-0.27	32
ELAVL1	ENSG00000213967	ZNF726	protein_coding	35	22	205	NA	NA	NA	NA	17
ELAVL1	ENSG00000097007	ABL1	protein_coding	72	29	204	NA	NA	NA	NA	28
ELAVL1	ENSG00000107485	GATA3	protein_coding	46	21	204	NA	NA	NA	NA	16
ELAVL1	ENSG00000109572	CLCN3	protein_coding	73	26	204	NA	NA	NA	NA	20
ELAVL1	ENSG00000134758	RNF138	protein_coding	47	23	204	NA	NA	NA	NA	27
ELAVL1	ENSG00000143384	MCL1	protein_coding	21	24	204	NA	NA	NA	NA	12
ELAVL1	ENSG00000158417	EIF5B	protein_coding	68	20	204	NA	NA	NA	NA	18
ELAVL1	ENSG00000162885	B3GALNT2	protein_coding	51	26	204	NA	NA	NA	NA	24
ELAVL1	ENSG00000164035	EMCN	protein_coding	71	19	204	NA	NA	NA	NA	14
ELAVL1	ENSG00000253352	TUG1	protein_coding	10	25	204	NA	NA	NA	-0.078	23
ELAVL1	ENSG00000288622	PDCD6-AHRR	protein_coding	66	21	204	NA	NA	NA	NA	0
ELAVL1	ENSG00000102580	DNAJC3	protein_coding	66	27	203	NA	NA	0.187	NA	15
ELAVL1	ENSG00000105810	CDK6	protein_coding	87	23	203	NA	NA	NA	NA	13
ELAVL1	ENSG00000116793	PHTF1	protein_coding	66	22	203	NA	NA	NA	NA	22
ELAVL1	ENSG00000134900	TPP2	protein_coding	79	27	203	NA	NA	NA	NA	26
ELAVL1	ENSG00000137145	DENND4C	protein_coding	86	21	203	NA	NA	NA	NA	15
ELAVL1	ENSG00000138246	DNAJC13	protein_coding	73	23	203	NA	NA	NA	NA	19
ELAVL1	ENSG00000148700	ADD3	protein_coding	106	13	203	NA	NA	NA	NA	12
ELAVL1	ENSG00000149179	C11orf49	protein_coding	100	19	203	NA	NA	NA	NA	24
ELAVL1	ENSG00000154743	TSEN2	protein_coding	65	15	203	NA	NA	NA	-0.413	25
ELAVL1	ENSG00000160710	ADAR	protein_coding	44	27	203	NA	NA	NA	0.193	24
ELAVL1	ENSG00000162604	TM2D1	protein_coding	56	26	203	NA	NA	NA	NA	18
ELAVL1	ENSG00000169045	HNRNPH1	protein_coding	19	30	203	NA	NA	0.069	NA	28
ELAVL1	ENSG00000183579	ZNRF3	protein_coding	69	24	203	NA	NA	NA	NA	18
ELAVL1	ENSG00000253537	PCDHGA7	protein_coding	48	26	203	NA	NA	NA	NA	16
ELAVL1	ENSG00000253767	PCDHGA8	protein_coding	48	26	203	NA	NA	NA	NA	13
ELAVL1	ENSG00000253953	PCDHGB4	protein_coding	48	26	203	NA	NA	NA	NA	12
ELAVL1	ENSG00000074266	EED	protein_coding	43	21	202	NA	NA	NA	NA	26
ELAVL1	ENSG00000111885	MAN1A1	protein_coding	65	26	202	NA	NA	NA	0.296	15
ELAVL1	ENSG00000136261	BZW2	protein_coding	66	25	202	NA	NA	NA	NA	23
ELAVL1	ENSG00000138688	KIAA1109	protein_coding	98	28	202	NA	NA	NA	NA	18
ELAVL1	ENSG00000164715	LMTK2	protein_coding	72	24	202	NA	NA	NA	NA	21
ELAVL1	ENSG00000168818	STX18	protein_coding	104	14	202	NA	NA	NA	NA	21
ELAVL1	ENSG00000175895	PLEKHF2	protein_coding	31	21	202	NA	NA	NA	NA	15
ELAVL1	ENSG00000197299	BLM	protein_coding	88	18	202	NA	NA	NA	NA	28
ELAVL1	ENSG00000198929	NOS1AP	protein_coding	74	21	202	NA	NA	NA	NA	12
ELAVL1	ENSG00000241484	ARHGAP8	protein_coding	50	18	202	NA	NA	NA	NA	12
ELAVL1	ENSG00000248405	PRR5-ARHGAP8	protein_coding	50	18	202	NA	NA	NA	NA	7
ELAVL1	ENSG00000088325	TPX2	protein_coding	77	24	201	NA	NA	-0.135	NA	30
ELAVL1	ENSG00000103335	PIEZO1	protein_coding	65	20	201	NA	NA	NA	NA	16
ELAVL1	ENSG00000112697	TMEM30A	protein_coding	34	27	201	NA	NA	NA	NA	14
ELAVL1	ENSG00000122643	NT5C3A	protein_coding	55	25	201	NA	NA	NA	NA	20
ELAVL1	ENSG00000130816	DNMT1	protein_coding	77	23	201	NA	NA	NA	-0.243	31
ELAVL1	ENSG00000134369	NAV1	protein_coding	45	21	201	NA	NA	NA	NA	15
ELAVL1	ENSG00000148690	FRA10AC1	protein_coding	46	21	201	NA	NA	NA	NA	16
ELAVL1	ENSG00000150347	ARID5B	protein_coding	76	25	201	NA	NA	NA	NA	14
ELAVL1	ENSG00000165704	HPRT1	protein_coding	70	18	201	NA	NA	NA	NA	26
ELAVL1	ENSG00000197386	HTT	protein_coding	91	20	201	NA	NA	NA	NA	16
ELAVL1	ENSG00000197756	RPL37A	protein_coding	60	21	201	NA	NA	NA	NA	13
ELAVL1	ENSG00000258465	AL139011.2	protein_coding	50	24	201	NA	NA	NA	NA	15
ELAVL1	ENSG00000288591	AC078815.1	protein_coding	75	19	201	NA	NA	NA	NA	0
ELAVL1	ENSG00000057935	MTA3	protein_coding	88	21	200	NA	NA	NA	-0.322	23
ELAVL1	ENSG00000074603	DPP8	protein_coding	60	32	200	NA	NA	NA	0.192	20
ELAVL1	ENSG00000085365	SCAMP1	protein_coding	66	26	200	NA	NA	NA	NA	18
ELAVL1	ENSG00000103121	CMC2	protein_coding	47	22	200	NA	NA	NA	NA	18
ELAVL1	ENSG00000103591	AAGAB	protein_coding	59	27	200	NA	NA	NA	NA	23
ELAVL1	ENSG00000104290	FZD3	protein_coding	38	25	200	NA	NA	NA	NA	19
ELAVL1	ENSG00000113318	MSH3	protein_coding	79	22	200	NA	NA	NA	NA	24
ELAVL1	ENSG00000136938	ANP32B	protein_coding	41	27	200	NA	NA	NA	NA	28
ELAVL1	ENSG00000172340	SUCLG2	protein_coding	75	26	200	NA	NA	NA	NA	16
ELAVL1	ENSG00000196396	PTPN1	protein_coding	59	24	200	NA	NA	NA	NA	22
ELAVL1	ENSG00000203546	AL139353.1	protein_coding	82	23	200	NA	NA	NA	NA	9
ELAVL1	ENSG00000250021	ARPIN-AP3S2	protein_coding	65	23	200	NA	NA	NA	NA	16
ELAVL1	ENSG00000050748	MAPK9	protein_coding	60	26	199	NA	NA	NA	NA	20
ELAVL1	ENSG00000067715	SYT1	protein_coding	92	21	199	NA	NA	NA	NA	17
ELAVL1	ENSG00000080603	SRCAP	protein_coding	54	26	199	NA	NA	NA	NA	22
ELAVL1	ENSG00000101152	DNAJC5	protein_coding	39	22	199	NA	NA	NA	NA	12
ELAVL1	ENSG00000106049	HIBADH	protein_coding	92	26	199	NA	NA	NA	NA	15
ELAVL1	ENSG00000106571	GLI3	protein_coding	77	23	199	NA	NA	NA	NA	16
ELAVL1	ENSG00000127914	AKAP9	protein_coding	95	21	199	NA	NA	NA	NA	21
ELAVL1	ENSG00000132670	PTPRA	protein_coding	92	19	199	NA	NA	NA	NA	20
ELAVL1	ENSG00000140948	ZCCHC14	protein_coding	54	26	199	NA	NA	NA	NA	20
ELAVL1	ENSG00000153707	PTPRD	protein_coding	136	17	199	NA	NA	NA	NA	10
ELAVL1	ENSG00000157107	FCHO2	protein_coding	82	21	199	NA	NA	NA	NA	17
ELAVL1	ENSG00000166689	PLEKHA7	protein_coding	83	19	199	NA	NA	NA	NA	14
ELAVL1	ENSG00000170522	ELOVL6	protein_coding	78	21	199	NA	NA	NA	NA	22
ELAVL1	ENSG00000175106	TVP23C	protein_coding	65	26	199	NA	NA	NA	NA	12
ELAVL1	ENSG00000187555	USP7	protein_coding	55	24	199	NA	NA	NA	NA	27
ELAVL1	ENSG00000072518	MARK2	protein_coding	56	26	198	NA	NA	NA	NA	25
ELAVL1	ENSG00000107863	ARHGAP21	protein_coding	95	22	198	NA	NA	NA	NA	19
ELAVL1	ENSG00000108557	RAI1	protein_coding	57	20	198	NA	NA	-0.171	NA	25
ELAVL1	ENSG00000115942	ORC2	protein_coding	59	23	198	NA	NA	NA	NA	29
ELAVL1	ENSG00000119912	IDE	protein_coding	100	26	198	NA	NA	NA	NA	20
ELAVL1	ENSG00000132640	BTBD3	protein_coding	44	25	198	NA	NA	NA	NA	20
ELAVL1	ENSG00000134313	KIDINS220	protein_coding	94	21	198	NA	NA	NA	NA	23
ELAVL1	ENSG00000143353	LYPLAL1	protein_coding	53	20	198	NA	NA	NA	NA	11
ELAVL1	ENSG00000145348	TBCK	protein_coding	87	20	198	NA	NA	NA	NA	21
ELAVL1	ENSG00000150938	CRIM1	protein_coding	63	28	198	NA	NA	0.213	NA	8
ELAVL1	ENSG00000153250	RBMS1	protein_coding	89	25	198	NA	NA	NA	NA	17
ELAVL1	ENSG00000189403	HMGB1	protein_coding	42	27	198	NA	NA	NA	NA	27
ELAVL1	ENSG00000198131	ZNF544	protein_coding	43	25	198	NA	NA	NA	NA	18
ELAVL1	ENSG00000198862	LTN1	protein_coding	71	22	198	NA	NA	NA	NA	19
ELAVL1	ENSG00000267360	AC012309.1	protein_coding	58	23	198	NA	NA	NA	NA	9
ELAVL1	ENSG00000268361	L34079.1	protein_coding	28	27	198	NA	NA	NA	NA	8
ELAVL1	ENSG00000272968	RBAK-RBAKDN	protein_coding	67	23	198	NA	NA	NA	NA	6
ELAVL1	ENSG00000284989	AL451062.2	protein_coding	97	26	198	NA	NA	NA	NA	0
ELAVL1	ENSG00000100596	SPTLC2	protein_coding	37	25	197	NA	NA	NA	NA	21
ELAVL1	ENSG00000120868	APAF1	protein_coding	69	24	197	NA	NA	NA	NA	21
ELAVL1	ENSG00000127481	UBR4	protein_coding	93	19	197	NA	NA	0.15	0.136	20
ELAVL1	ENSG00000135535	CD164	protein_coding	19	29	197	NA	NA	NA	NA	18
ELAVL1	ENSG00000136450	SRSF1	protein_coding	6	34	197	NA	NA	-0.166	NA	32
ELAVL1	ENSG00000136731	UGGT1	protein_coding	80	25	197	NA	NA	NA	NA	25
ELAVL1	ENSG00000139726	DENR	protein_coding	22	28	197	NA	NA	NA	-0.247	29
ELAVL1	ENSG00000164944	VIRMA	protein_coding	72	21	197	NA	NA	NA	0.3	22
ELAVL1	ENSG00000256500	AL139300.1	protein_coding	63	25	197	NA	NA	NA	NA	9
ELAVL1	ENSG00000283782	AC116366.1	protein_coding	82	25	197	NA	NA	NA	NA	0
ELAVL1	ENSG00000087301	TXNDC16	protein_coding	88	19	196	NA	NA	NA	NA	23
ELAVL1	ENSG00000109911	ELP4	protein_coding	100	25	196	NA	NA	NA	NA	26
ELAVL1	ENSG00000119231	SENP5	protein_coding	49	27	196	NA	NA	NA	NA	25
ELAVL1	ENSG00000120262	CCDC170	protein_coding	53	15	196	NA	NA	NA	NA	13
ELAVL1	ENSG00000143401	ANP32E	protein_coding	14	30	196	NA	NA	NA	NA	27
ELAVL1	ENSG00000155096	AZIN1	protein_coding	47	28	196	NA	NA	NA	NA	27
ELAVL1	ENSG00000184178	SCFD2	protein_coding	122	23	196	NA	NA	NA	NA	25
ELAVL1	ENSG00000198373	WWP2	protein_coding	83	22	196	NA	NA	NA	NA	15
ELAVL1	ENSG00000086712	TXLNG	protein_coding	63	24	195	NA	NA	NA	-0.297	28
ELAVL1	ENSG00000100523	DDHD1	protein_coding	83	24	195	NA	NA	NA	NA	18
ELAVL1	ENSG00000114480	GBE1	protein_coding	81	23	195	NA	NA	NA	NA	17
ELAVL1	ENSG00000115866	DARS1	protein_coding	69	24	195	NA	NA	NA	NA	24
ELAVL1	ENSG00000121774	KHDRBS1	protein_coding	42	26	195	NA	NA	NA	NA	32
ELAVL1	ENSG00000142875	PRKACB	protein_coding	78	27	195	NA	NA	NA	NA	16
ELAVL1	ENSG00000144224	UBXN4	protein_coding	45	26	195	NA	NA	NA	NA	26
ELAVL1	ENSG00000159217	IGF2BP1	protein_coding	47	18	195	NA	NA	NA	NA	13
ELAVL1	ENSG00000165417	GTF2A1	protein_coding	29	27	195	NA	NA	NA	NA	24
ELAVL1	ENSG00000198369	SPRED2	protein_coding	71	23	195	NA	NA	-0.122	NA	25
ELAVL1	ENSG00000030066	NUP160	protein_coding	69	21	194	NA	NA	NA	NA	28
ELAVL1	ENSG00000109046	WSB1	protein_coding	26	25	194	NA	NA	NA	NA	13
ELAVL1	ENSG00000120733	KDM3B	protein_coding	69	24	194	NA	NA	NA	NA	25
ELAVL1	ENSG00000139323	POC1B	protein_coding	58	24	194	NA	NA	NA	NA	21
ELAVL1	ENSG00000152127	MGAT5	protein_coding	67	25	194	NA	NA	NA	NA	14
ELAVL1	ENSG00000156931	VPS8	protein_coding	110	19	194	NA	NA	NA	NA	17
ELAVL1	ENSG00000166532	RIMKLB	protein_coding	50	28	194	NA	NA	NA	0.348	17
ELAVL1	ENSG00000172775	PSME3IP1	protein_coding	39	27	194	NA	NA	NA	NA	25
ELAVL1	ENSG00000173542	MOB1B	protein_coding	79	30	194	NA	NA	NA	0.413	21
ELAVL1	ENSG00000196821	ILRUN	protein_coding	79	24	194	NA	NA	NA	0.351	14
ELAVL1	ENSG00000100014	SPECC1L	protein_coding	86	23	193	NA	NA	NA	NA	22
ELAVL1	ENSG00000100796	PPP4R3A	protein_coding	55	24	193	NA	NA	NA	NA	26
ELAVL1	ENSG00000112237	CCNC	protein_coding	41	22	193	NA	NA	NA	NA	20
ELAVL1	ENSG00000122218	COPA	protein_coding	62	27	193	NA	NA	NA	0.325	25
ELAVL1	ENSG00000123505	AMD1	protein_coding	35	31	193	NA	NA	NA	NA	19
ELAVL1	ENSG00000129534	MIS18BP1	protein_coding	58	23	193	NA	NA	NA	NA	27
ELAVL1	ENSG00000146676	PURB	protein_coding	8	29	193	NA	NA	NA	NA	19
ELAVL1	ENSG00000152413	HOMER1	protein_coding	81	22	193	NA	NA	NA	NA	25
ELAVL1	ENSG00000177189	RPS6KA3	protein_coding	90	17	193	NA	NA	NA	NA	21
ELAVL1	ENSG00000188647	PTAR1	protein_coding	48	23	193	NA	NA	NA	0.293	19
ELAVL1	ENSG00000197930	ERO1A	protein_coding	41	26	193	NA	NA	NA	NA	16
ELAVL1	ENSG00000197965	MPZL1	protein_coding	57	27	193	NA	NA	NA	NA	19
ELAVL1	ENSG00000096401	CDC5L	protein_coding	56	21	192	NA	NA	NA	NA	27
ELAVL1	ENSG00000102144	PGK1	protein_coding	73	30	192	NA	NA	NA	NA	19
ELAVL1	ENSG00000112081	SRSF3	protein_coding	16	29	192	NA	NA	NA	NA	29
ELAVL1	ENSG00000113615	SEC24A	protein_coding	68	23	192	NA	NA	NA	0.299	18
ELAVL1	ENSG00000114850	SSR3	protein_coding	21	29	192	NA	NA	NA	NA	15
ELAVL1	ENSG00000120697	ALG5	protein_coding	55	22	192	NA	NA	NA	NA	20
ELAVL1	ENSG00000126821	SGPP1	protein_coding	45	25	192	NA	NA	NA	NA	16
ELAVL1	ENSG00000132780	NASP	protein_coding	50	21	192	NA	NA	NA	NA	28
ELAVL1	ENSG00000138101	DTNB	protein_coding	84	20	192	NA	NA	NA	NA	15
ELAVL1	ENSG00000166479	TMX3	protein_coding	42	26	192	NA	NA	NA	NA	22
ELAVL1	ENSG00000172939	OXSR1	protein_coding	66	27	192	NA	NA	NA	NA	24
ELAVL1	ENSG00000268750	AC010522.1	protein_coding	52	25	192	NA	NA	NA	NA	22
ELAVL1	ENSG00000081014	AP4E1	protein_coding	56	20	191	NA	NA	NA	NA	22
ELAVL1	ENSG00000100916	BRMS1L	protein_coding	77	23	191	NA	NA	NA	NA	22
ELAVL1	ENSG00000108010	GLRX3	protein_coding	60	21	191	NA	NA	NA	NA	22
ELAVL1	ENSG00000120539	MASTL	protein_coding	40	23	191	NA	NA	NA	NA	29
ELAVL1	ENSG00000138698	RAP1GDS1	protein_coding	83	28	191	NA	NA	NA	NA	22
ELAVL1	ENSG00000139354	GAS2L3	protein_coding	43	26	191	NA	NA	NA	NA	24
ELAVL1	ENSG00000165732	DDX21	protein_coding	33	25	191	NA	NA	NA	NA	24
ELAVL1	ENSG00000173406	DAB1	protein_coding	112	21	191	NA	NA	NA	NA	10
ELAVL1	ENSG00000173726	TOMM20	protein_coding	22	26	191	NA	NA	NA	NA	23
ELAVL1	ENSG00000175893	ZDHHC21	protein_coding	56	28	191	NA	NA	NA	NA	16
ELAVL1	ENSG00000196323	ZBTB44	protein_coding	53	27	191	NA	NA	NA	NA	21
ELAVL1	ENSG00000198060	MARCHF5	protein_coding	64	25	191	NA	NA	NA	NA	25
ELAVL1	ENSG00000282246	AL157392.5	protein_coding	57	16	191	NA	NA	NA	NA	0
ELAVL1	ENSG00000065833	ME1	protein_coding	71	21	190	NA	NA	NA	0.544	10
ELAVL1	ENSG00000107951	MTPAP	protein_coding	47	26	190	NA	NA	NA	NA	29
ELAVL1	ENSG00000113522	RAD50	protein_coding	75	24	190	NA	NA	NA	-0.347	23
ELAVL1	ENSG00000114573	ATP6V1A	protein_coding	55	28	190	NA	NA	NA	NA	17
ELAVL1	ENSG00000115159	GPD2	protein_coding	66	30	190	NA	NA	NA	NA	22
ELAVL1	ENSG00000116120	FARSB	protein_coding	86	18	190	NA	NA	NA	NA	27
ELAVL1	ENSG00000137831	UACA	protein_coding	87	21	190	NA	NA	NA	NA	10
ELAVL1	ENSG00000159023	EPB41	protein_coding	97	23	190	NA	NA	NA	NA	23
ELAVL1	ENSG00000159459	UBR1	protein_coding	116	21	190	NA	NA	NA	NA	20
ELAVL1	ENSG00000189159	JPT1	protein_coding	39	31	190	NA	NA	NA	NA	21
ELAVL1	ENSG00000197102	DYNC1H1	protein_coding	65	24	190	NA	NA	NA	0.59	18
ELAVL1	ENSG00000205726	ITSN1	protein_coding	106	19	190	NA	NA	NA	NA	20
ELAVL1	ENSG00000113407	TARS1	protein_coding	35	20	189	NA	NA	NA	NA	27
ELAVL1	ENSG00000117222	RBBP5	protein_coding	43	28	189	NA	NA	NA	NA	29
ELAVL1	ENSG00000120705	ETF1	protein_coding	44	24	189	NA	NA	NA	NA	21
ELAVL1	ENSG00000134138	MEIS2	protein_coding	115	17	189	NA	NA	NA	-0.319	15
ELAVL1	ENSG00000153561	RMND5A	protein_coding	47	32	189	NA	NA	NA	NA	25
ELAVL1	ENSG00000155189	AGPAT5	protein_coding	56	27	189	NA	NA	NA	NA	25
ELAVL1	ENSG00000162409	PRKAA2	protein_coding	59	18	189	NA	NA	NA	NA	15
ELAVL1	ENSG00000164162	ANAPC10	protein_coding	106	21	189	NA	NA	NA	NA	23
ELAVL1	ENSG00000196542	SPTSSB	protein_coding	39	16	189	NA	NA	NA	NA	11
ELAVL1	ENSG00000272602	ZNF595	protein_coding	36	24	189	NA	NA	-4.571	NA	16
ELAVL1	ENSG00000276547	PCDHGB5	protein_coding	44	26	189	NA	NA	NA	NA	20
ELAVL1	ENSG00000122591	FAM126A	protein_coding	97	13	188	NA	NA	NA	NA	19
ELAVL1	ENSG00000135048	CEMIP2	protein_coding	74	28	188	NA	NA	0.339	NA	18
ELAVL1	ENSG00000137804	NUSAP1	protein_coding	47	28	188	NA	NA	NA	NA	30
ELAVL1	ENSG00000143457	GOLPH3L	protein_coding	37	28	188	NA	NA	NA	NA	19
ELAVL1	ENSG00000151090	THRB	protein_coding	84	19	188	NA	NA	NA	NA	11
ELAVL1	ENSG00000156162	DPY19L4	protein_coding	51	23	188	NA	NA	NA	NA	20
ELAVL1	ENSG00000170144	HNRNPA3	protein_coding	15	28	188	NA	NA	NA	NA	30
ELAVL1	ENSG00000179134	SAMD4B	protein_coding	50	25	188	NA	NA	NA	-0.154	26
ELAVL1	ENSG00000071537	SEL1L	protein_coding	50	26	187	NA	NA	NA	NA	14
ELAVL1	ENSG00000076108	BAZ2A	protein_coding	28	24	187	NA	NA	NA	0.195	23
ELAVL1	ENSG00000102471	NDFIP2	protein_coding	69	24	187	NA	NA	NA	NA	18
ELAVL1	ENSG00000103091	WDR59	protein_coding	74	20	187	NA	NA	NA	NA	21
ELAVL1	ENSG00000107077	KDM4C	protein_coding	96	26	187	NA	NA	NA	NA	19
ELAVL1	ENSG00000109686	SH3D19	protein_coding	75	27	187	NA	NA	NA	NA	16
ELAVL1	ENSG00000127124	HIVEP3	protein_coding	72	17	187	NA	NA	NA	NA	13
ELAVL1	ENSG00000132478	UNK	protein_coding	32	26	187	NA	NA	NA	0.201	27
ELAVL1	ENSG00000133835	HSD17B4	protein_coding	84	21	187	NA	NA	NA	NA	24
ELAVL1	ENSG00000144566	RAB5A	protein_coding	44	23	187	NA	NA	NA	NA	16
ELAVL1	ENSG00000165733	BMS1	protein_coding	53	20	187	NA	NA	NA	NA	30
ELAVL1	ENSG00000169379	ARL13B	protein_coding	91	16	187	NA	NA	NA	NA	23
ELAVL1	ENSG00000197535	MYO5A	protein_coding	84	23	187	NA	NA	NA	NA	13
ELAVL1	ENSG00000206418	RAB12	protein_coding	44	31	187	NA	NA	NA	NA	18
ELAVL1	ENSG00000066557	LRRC40	protein_coding	71	21	186	NA	NA	NA	NA	25
ELAVL1	ENSG00000079950	STX7	protein_coding	71	28	186	NA	NA	NA	NA	14
ELAVL1	ENSG00000095209	TMEM38B	protein_coding	58	24	186	NA	NA	NA	NA	23
ELAVL1	ENSG00000100890	PRORP	protein_coding	81	23	186	NA	NA	NA	NA	24
ELAVL1	ENSG00000113739	STC2	protein_coding	16	25	186	NA	NA	NA	NA	18
ELAVL1	ENSG00000115053	NCL	protein_coding	15	33	186	NA	NA	NA	NA	31
ELAVL1	ENSG00000116918	TSNAX	protein_coding	44	26	186	NA	NA	NA	NA	21
ELAVL1	ENSG00000125304	TM9SF2	protein_coding	67	25	186	NA	NA	0.201	NA	18
ELAVL1	ENSG00000134243	SORT1	protein_coding	60	30	186	NA	NA	NA	NA	14
ELAVL1	ENSG00000136631	VPS45	protein_coding	67	18	186	NA	NA	NA	NA	23
ELAVL1	ENSG00000160633	SAFB	protein_coding	58	21	186	NA	NA	NA	NA	31
ELAVL1	ENSG00000180233	ZNRF2	protein_coding	46	24	186	NA	NA	NA	NA	21
ELAVL1	ENSG00000181722	ZBTB20	protein_coding	127	20	186	NA	NA	NA	NA	15
ELAVL1	ENSG00000189180	ZNF33A	protein_coding	50	23	186	NA	NA	NA	NA	18
ELAVL1	ENSG00000197771	MCMBP	protein_coding	61	28	186	NA	NA	NA	NA	25
ELAVL1	ENSG00000244687	UBE2V1	protein_coding	47	27	186	NA	NA	NA	-0.138	19
ELAVL1	ENSG00000274810	NPHP3-ACAD11	protein_coding	95	20	186	NA	NA	NA	NA	12
ELAVL1	ENSG00000282034	AC106886.5	protein_coding	50	26	186	NA	NA	NA	NA	0
ELAVL1	ENSG00000006652	IFRD1	protein_coding	43	28	185	NA	NA	NA	NA	18
ELAVL1	ENSG00000085511	MAP3K4	protein_coding	68	20	185	NA	NA	NA	NA	26
ELAVL1	ENSG00000116266	STXBP3	protein_coding	63	21	185	NA	NA	NA	NA	19
ELAVL1	ENSG00000117419	ERI3	protein_coding	108	22	185	NA	NA	NA	-0.299	20
ELAVL1	ENSG00000136891	TEX10	protein_coding	59	25	185	NA	NA	NA	NA	31
ELAVL1	ENSG00000145604	SKP2	protein_coding	51	33	185	NA	NA	NA	NA	30
ELAVL1	ENSG00000146842	TMEM209	protein_coding	38	30	185	NA	NA	NA	-0.391	27
ELAVL1	ENSG00000147140	NONO	protein_coding	22	30	185	NA	NA	NA	-0.094	29
ELAVL1	ENSG00000152558	TMEM123	protein_coding	34	29	185	NA	NA	NA	NA	23
ELAVL1	ENSG00000154274	C4orf19	protein_coding	71	22	185	NA	NA	NA	NA	11
ELAVL1	ENSG00000158195	WASF2	protein_coding	68	21	185	NA	NA	NA	NA	18
ELAVL1	ENSG00000168246	UBTD2	protein_coding	63	25	185	NA	NA	NA	NA	25
ELAVL1	ENSG00000259332	ST20-MTHFS	protein_coding	68	21	185	NA	NA	NA	-0.772	20
ELAVL1	ENSG00000089280	FUS	protein_coding	16	28	184	NA	NA	NA	-0.534	30
ELAVL1	ENSG00000099991	CABIN1	protein_coding	74	23	184	NA	NA	NA	NA	23
ELAVL1	ENSG00000113742	CPEB4	protein_coding	48	27	184	NA	NA	NA	NA	21
ELAVL1	ENSG00000137502	RAB30	protein_coding	61	20	184	NA	NA	NA	NA	13
ELAVL1	ENSG00000139921	TMX1	protein_coding	21	31	184	NA	NA	NA	NA	20
ELAVL1	ENSG00000141252	VPS53	protein_coding	81	24	184	NA	NA	NA	NA	24
ELAVL1	ENSG00000150401	DCUN1D2	protein_coding	37	25	184	NA	NA	NA	NA	18
ELAVL1	ENSG00000168675	LDLRAD4	protein_coding	82	20	184	NA	NA	NA	NA	15
ELAVL1	ENSG00000173402	DAG1	protein_coding	41	30	184	NA	NA	NA	NA	20
ELAVL1	ENSG00000185238	PRMT3	protein_coding	84	23	184	NA	NA	NA	NA	26
ELAVL1	ENSG00000197008	ZNF138	protein_coding	49	19	184	NA	NA	NA	NA	18
ELAVL1	ENSG00000261934	PCDHGA9	protein_coding	42	26	184	NA	NA	NA	NA	13
ELAVL1	ENSG00000079691	CARMIL1	protein_coding	83	27	183	NA	NA	NA	NA	24
ELAVL1	ENSG00000097096	SYDE2	protein_coding	42	26	183	NA	NA	NA	NA	12
ELAVL1	ENSG00000108094	CUL2	protein_coding	88	22	183	NA	NA	NA	NA	25
ELAVL1	ENSG00000112234	FBXL4	protein_coding	62	27	183	NA	NA	NA	NA	21
ELAVL1	ENSG00000119929	CUTC	protein_coding	41	25	183	NA	NA	NA	0.562	16
ELAVL1	ENSG00000140575	IQGAP1	protein_coding	55	30	183	NA	NA	NA	NA	16
ELAVL1	ENSG00000147853	AK3	protein_coding	32	27	183	NA	NA	NA	NA	19
ELAVL1	ENSG00000156030	MIDEAS	protein_coding	36	24	183	NA	NA	NA	NA	18
ELAVL1	ENSG00000156970	BUB1B	protein_coding	76	20	183	NA	NA	NA	NA	30
ELAVL1	ENSG00000157388	CACNA1D	protein_coding	74	16	183	NA	NA	NA	NA	13
ELAVL1	ENSG00000170448	NFXL1	protein_coding	64	19	183	NA	NA	NA	0.324	26
ELAVL1	ENSG00000175105	ZNF654	protein_coding	73	22	183	NA	NA	NA	NA	19
ELAVL1	ENSG00000205268	PDE7A	protein_coding	79	24	183	NA	NA	NA	NA	22
ELAVL1	ENSG00000035403	VCL	protein_coding	73	27	182	NA	NA	NA	NA	16
ELAVL1	ENSG00000084093	REST	protein_coding	40	32	182	NA	NA	NA	NA	20
ELAVL1	ENSG00000085382	HACE1	protein_coding	84	19	182	NA	NA	NA	NA	23
ELAVL1	ENSG00000099810	MTAP	protein_coding	64	23	182	NA	NA	NA	NA	21
ELAVL1	ENSG00000108582	CPD	protein_coding	65	24	182	NA	NA	NA	NA	20
ELAVL1	ENSG00000113575	PPP2CA	protein_coding	45	29	182	NA	NA	NA	NA	22
ELAVL1	ENSG00000113583	C5orf15	protein_coding	14	31	182	NA	NA	NA	NA	20
ELAVL1	ENSG00000119285	HEATR1	protein_coding	68	29	182	NA	NA	NA	-0.34	30
ELAVL1	ENSG00000125850	OVOL2	protein_coding	26	30	182	NA	NA	NA	NA	13
ELAVL1	ENSG00000135951	TSGA10	protein_coding	74	18	182	NA	NA	NA	NA	13
ELAVL1	ENSG00000136100	VPS36	protein_coding	39	27	182	NA	NA	NA	-0.459	18
ELAVL1	ENSG00000138078	PREPL	protein_coding	52	28	182	NA	NA	NA	NA	23
ELAVL1	ENSG00000164985	PSIP1	protein_coding	60	28	182	NA	NA	NA	-0.142	26
ELAVL1	ENSG00000185722	ANKFY1	protein_coding	78	24	182	NA	NA	NA	NA	22
ELAVL1	ENSG00000185787	MORF4L1	protein_coding	35	29	182	NA	NA	NA	NA	22
ELAVL1	ENSG00000223496	EXOSC6	protein_coding	2	32	182	NA	NA	NA	-0.384	25
ELAVL1	ENSG00000261717	AC009163.5	protein_coding	38	23	182	NA	NA	NA	NA	9
ELAVL1	ENSG00000286235	AL035461.3	protein_coding	86	24	182	NA	NA	NA	NA	0
ELAVL1	ENSG00000069248	NUP133	protein_coding	73	20	181	NA	NA	NA	NA	27
ELAVL1	ENSG00000095139	ARCN1	protein_coding	22	30	181	NA	NA	NA	0.419	19
ELAVL1	ENSG00000117000	RLF	protein_coding	82	17	181	NA	NA	NA	NA	24
ELAVL1	ENSG00000120008	WDR11	protein_coding	69	20	181	NA	NA	NA	NA	19
ELAVL1	ENSG00000132199	ENOSF1	protein_coding	49	21	181	NA	NA	NA	NA	14
ELAVL1	ENSG00000132356	PRKAA1	protein_coding	36	28	181	NA	NA	NA	NA	19
ELAVL1	ENSG00000134453	RBM17	protein_coding	37	26	181	NA	NA	NA	NA	26
ELAVL1	ENSG00000144554	FANCD2	protein_coding	59	24	181	NA	NA	NA	NA	29
ELAVL1	ENSG00000166200	COPS2	protein_coding	48	23	181	NA	NA	NA	NA	24
ELAVL1	ENSG00000172466	ZNF24	protein_coding	8	27	181	NA	NA	NA	NA	23
ELAVL1	ENSG00000176095	IP6K1	protein_coding	62	19	181	NA	NA	NA	NA	22
ELAVL1	ENSG00000183722	LHFPL6	protein_coding	92	25	181	NA	NA	NA	NA	16
ELAVL1	ENSG00000196352	CD55	protein_coding	57	24	181	NA	NA	NA	NA	15
ELAVL1	ENSG00000204740	MALRD1	protein_coding	82	22	181	NA	NA	NA	NA	7
ELAVL1	ENSG00000061936	SFSWAP	protein_coding	76	20	180	NA	NA	NA	-0.245	26
ELAVL1	ENSG00000078618	NRDC	protein_coding	77	16	180	NA	NA	NA	NA	24
ELAVL1	ENSG00000087338	GMCL1	protein_coding	58	23	180	NA	NA	NA	NA	26
ELAVL1	ENSG00000099783	HNRNPM	protein_coding	49	28	180	NA	NA	NA	NA	30
ELAVL1	ENSG00000110395	CBL	protein_coding	57	24	180	NA	NA	NA	NA	24
ELAVL1	ENSG00000115816	CEBPZ	protein_coding	37	23	180	NA	NA	NA	NA	26
ELAVL1	ENSG00000125954	CHURC1-FNTB	protein_coding	80	24	180	NA	NA	4.569	NA	15
ELAVL1	ENSG00000139350	NEDD1	protein_coding	53	22	180	NA	NA	NA	NA	30
[truncated: 13,902 more rows]
